# Supplementary figures and images for: EastGRIP ice core reveals the exceptional evolution of crystallographic preferred orientation throughout the Northeast Greenland Ice Stream
Source: Copernicus journal article supplement (doi:10.5194/egusphere-2024-2653), 2024-10-01

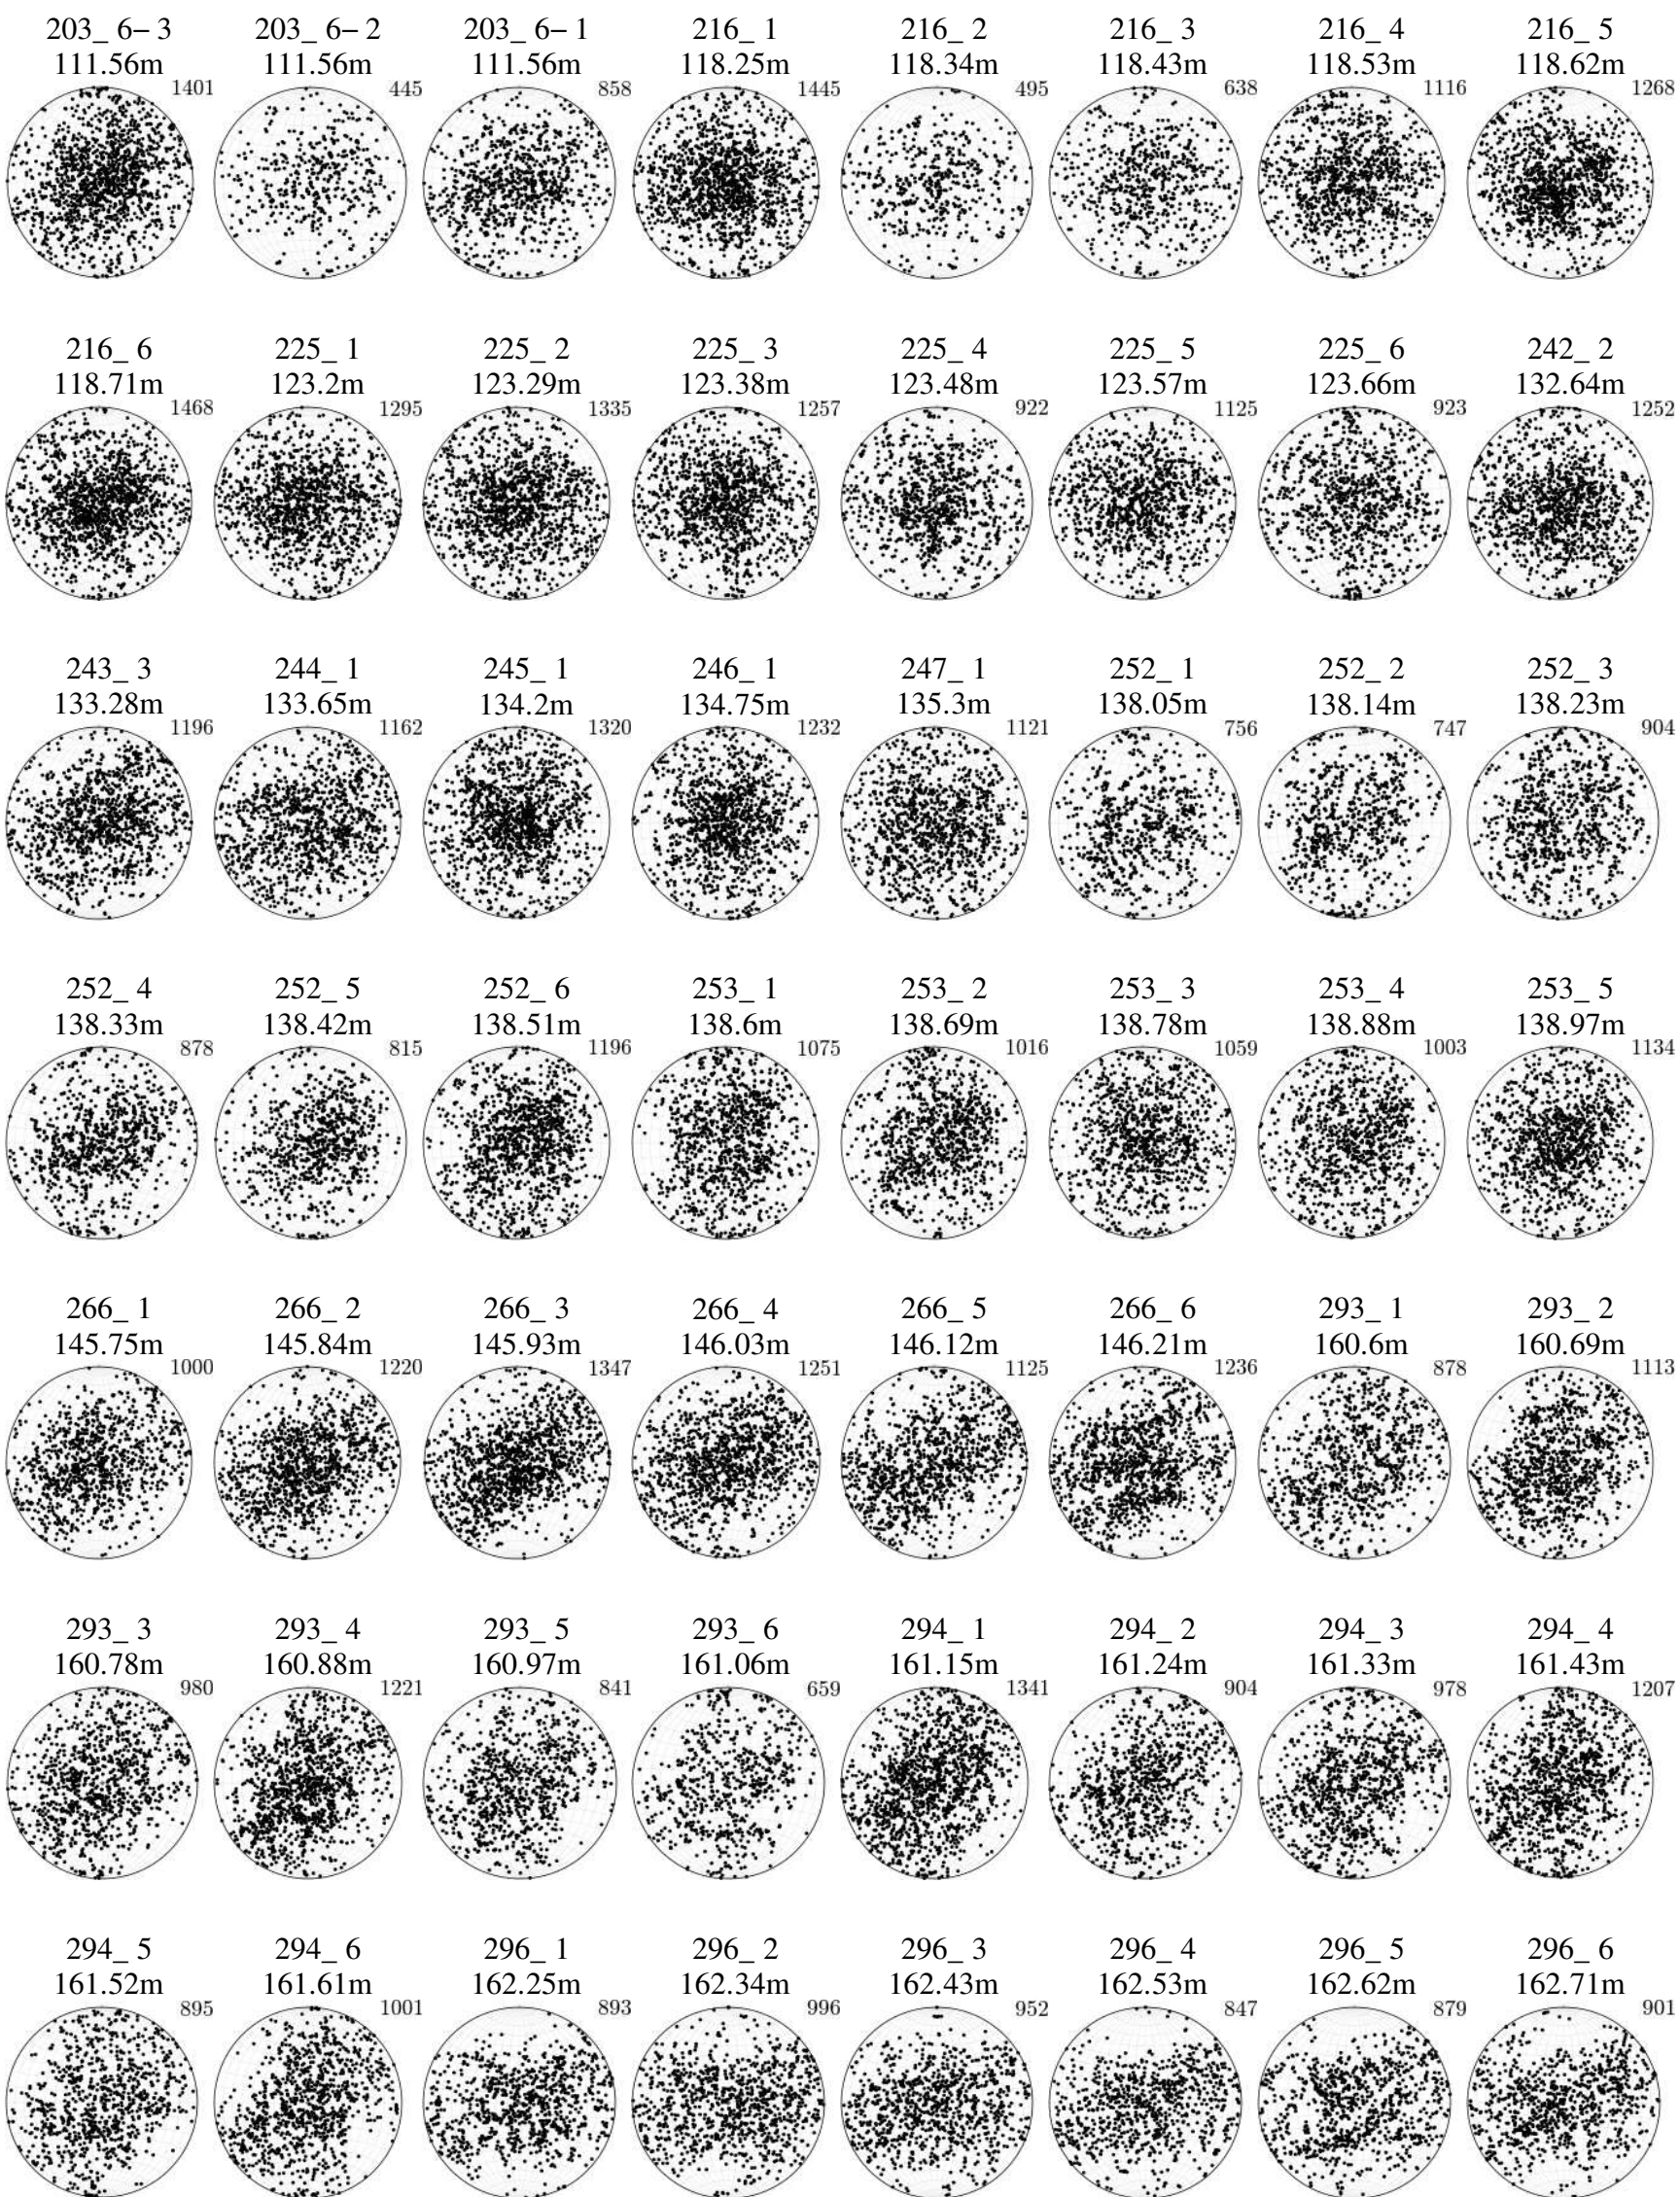

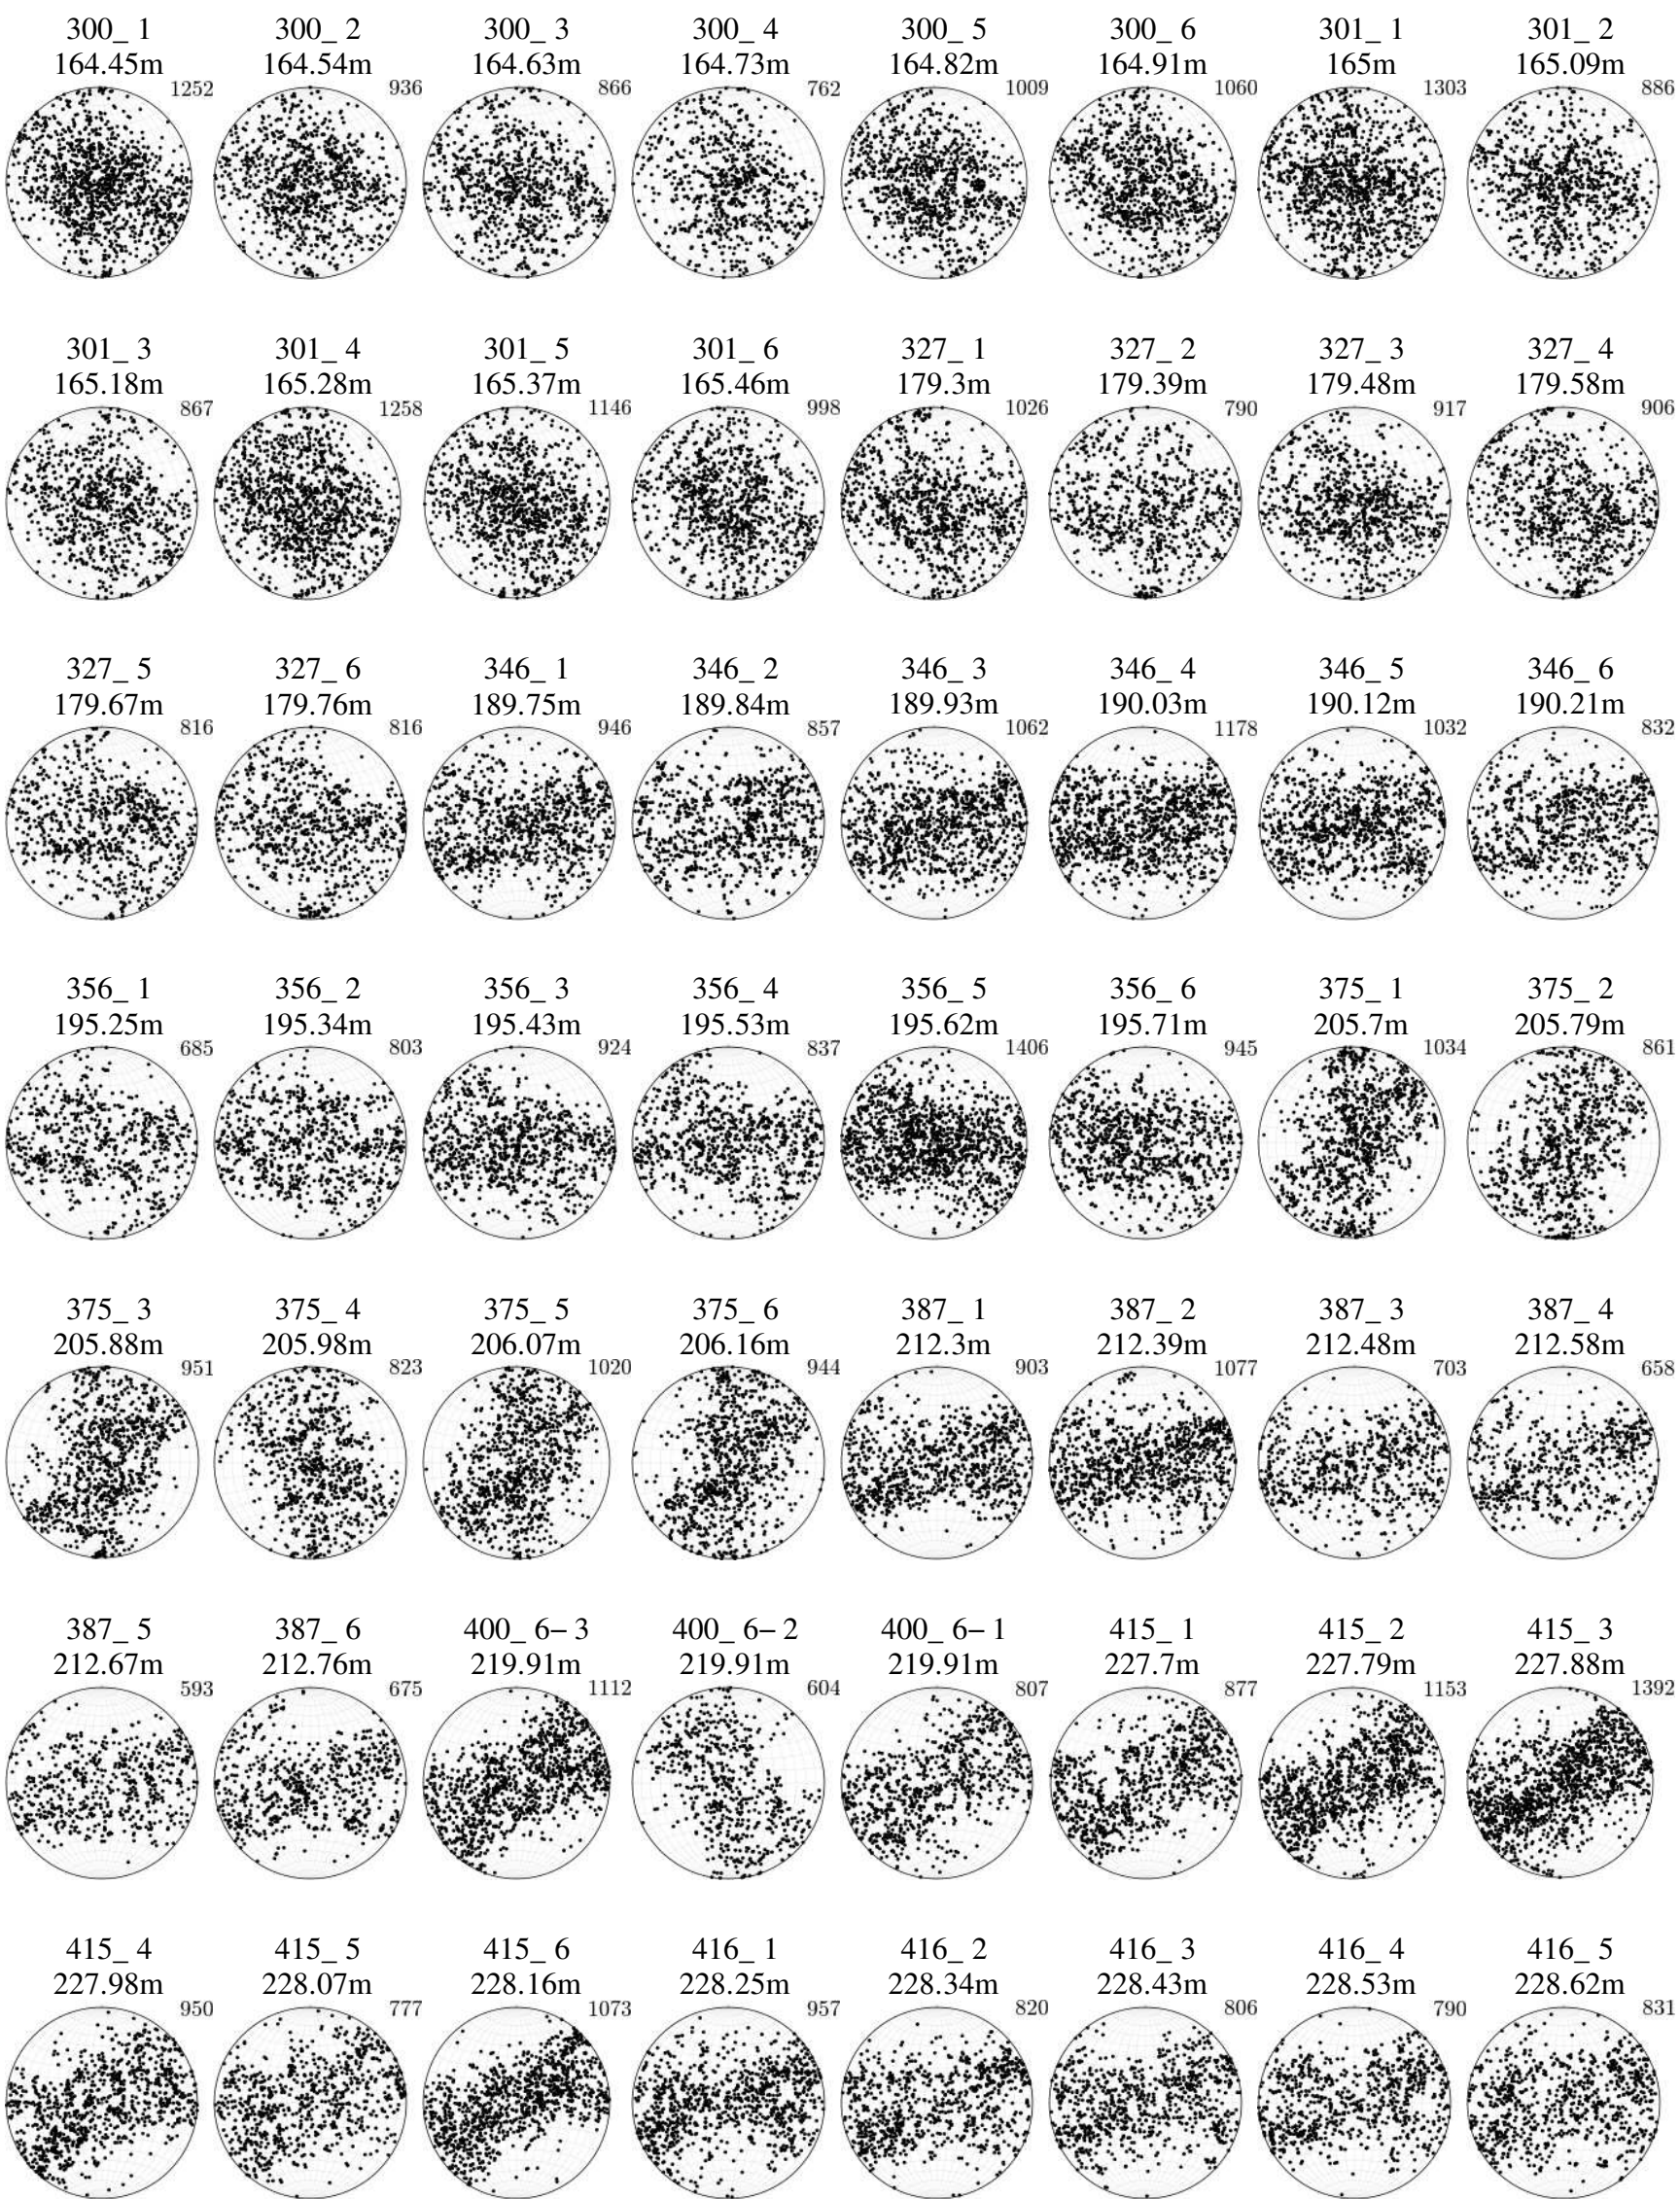

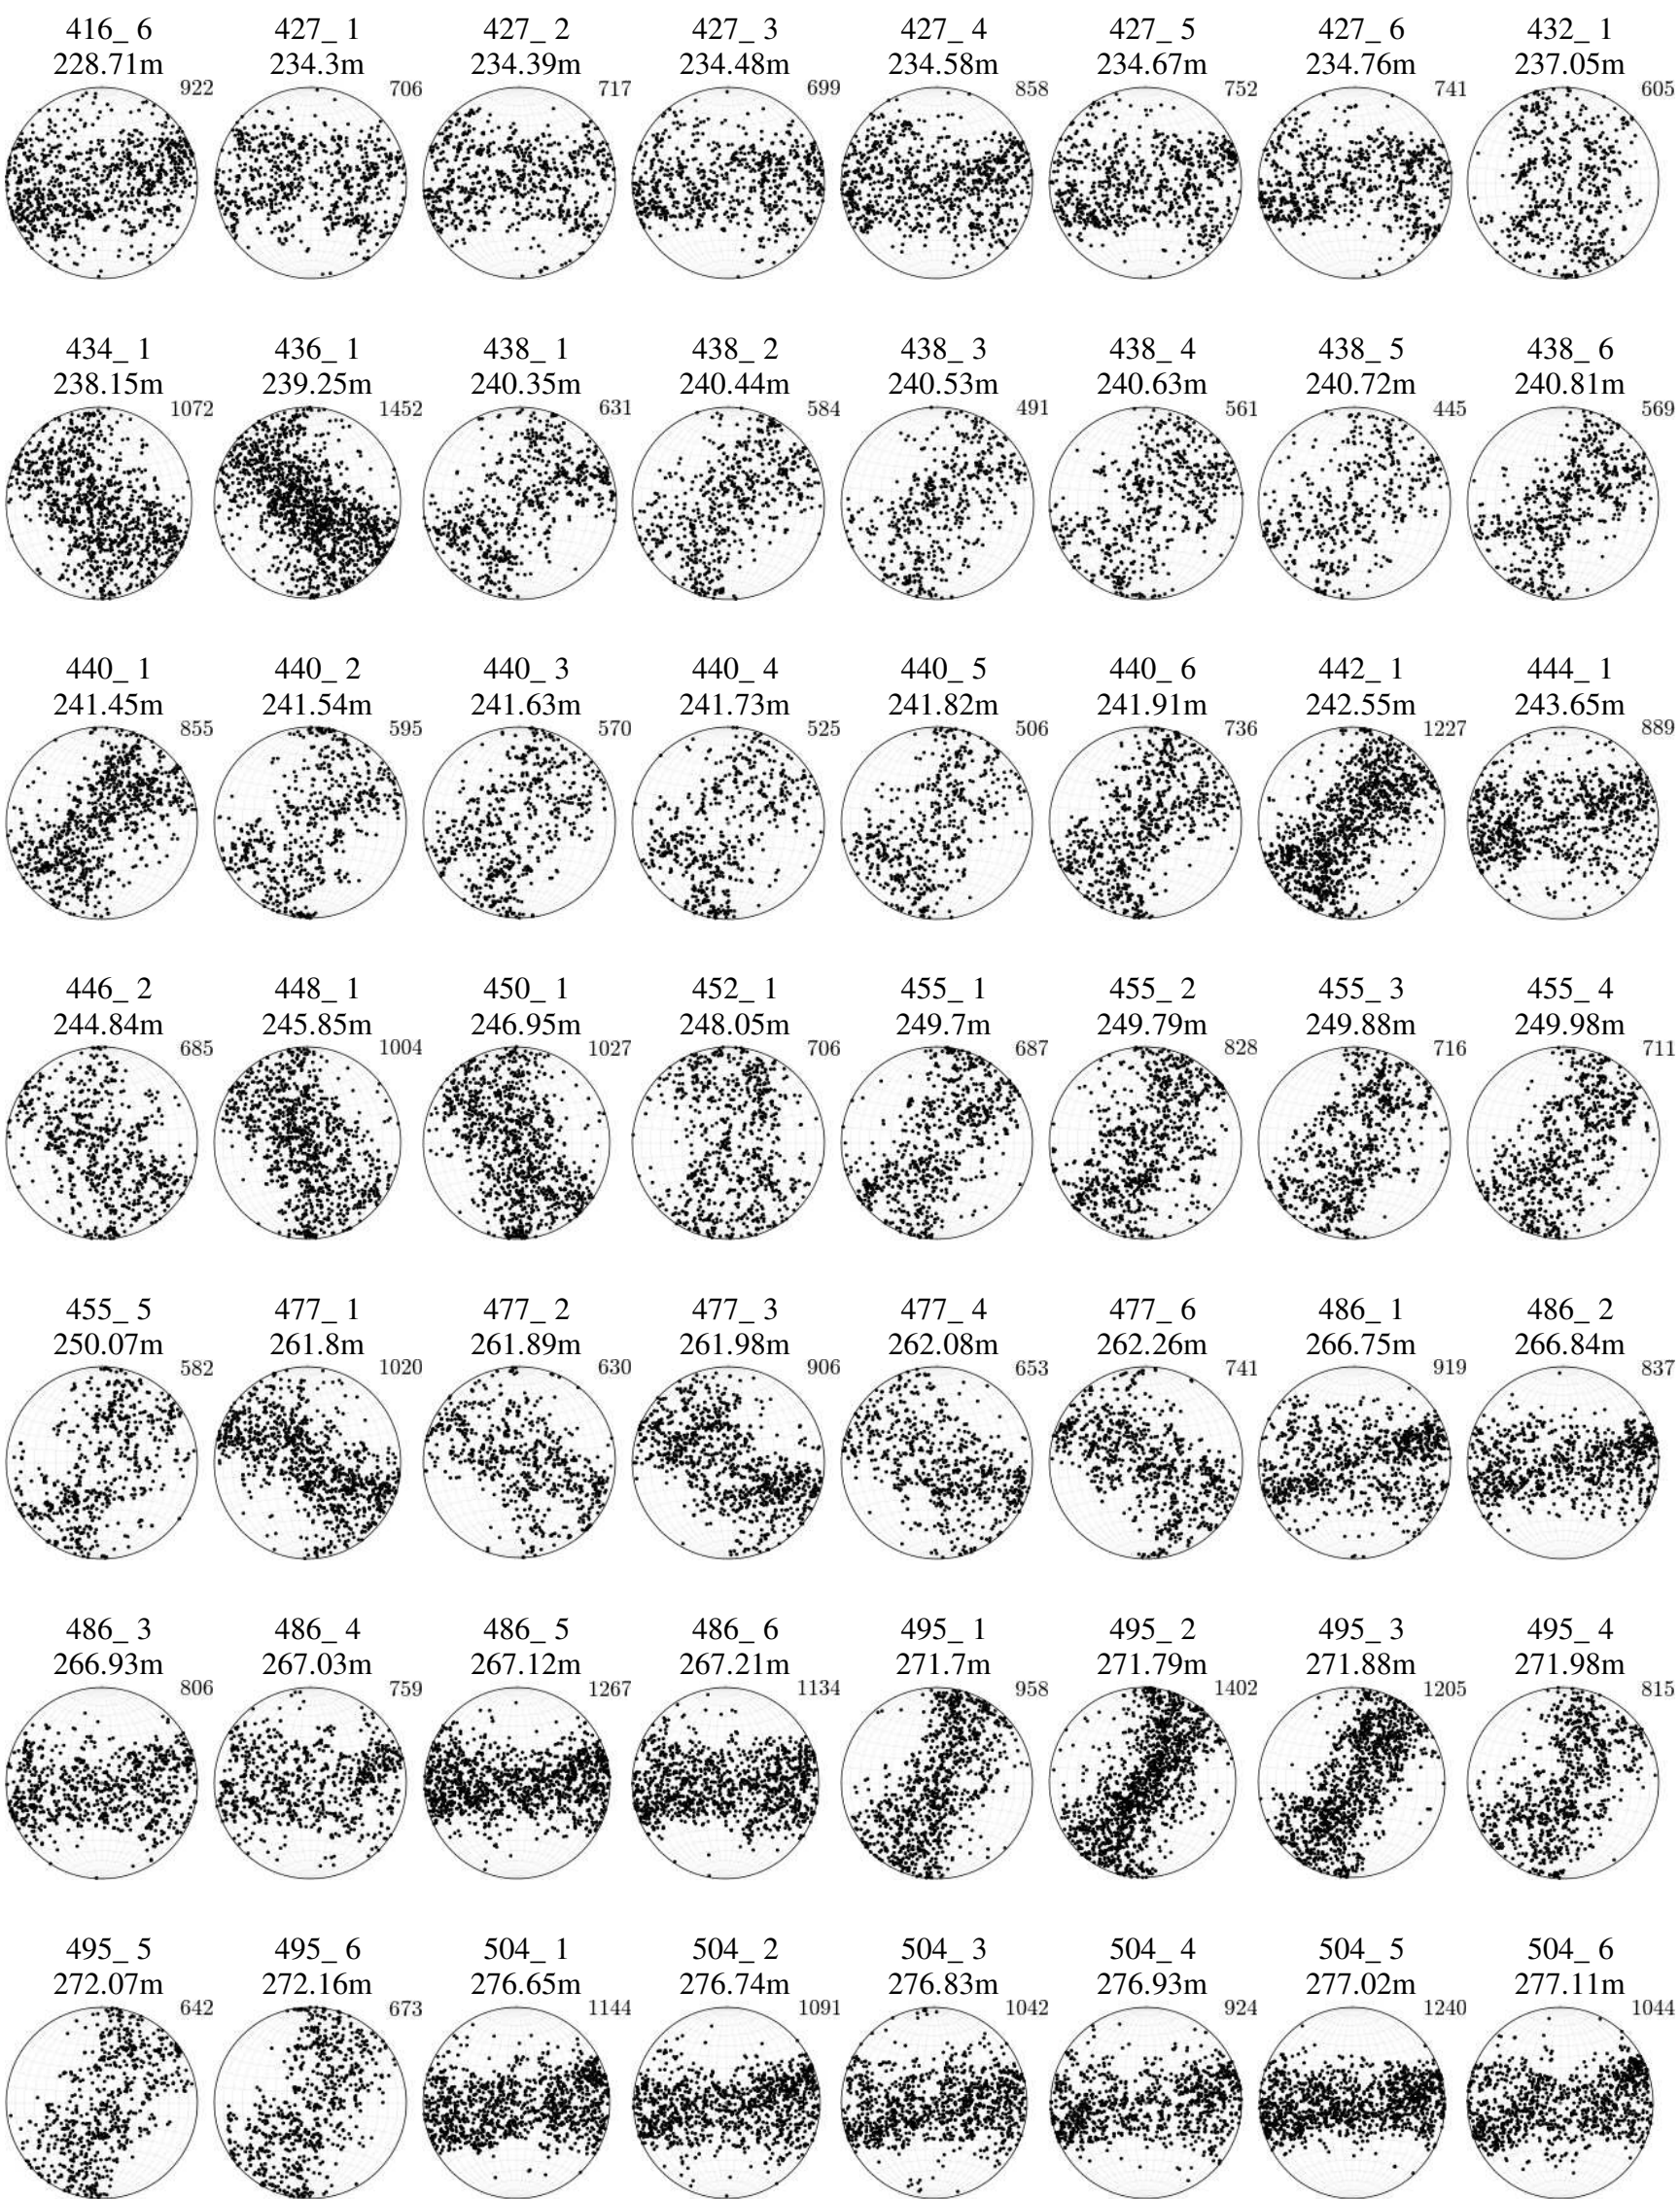

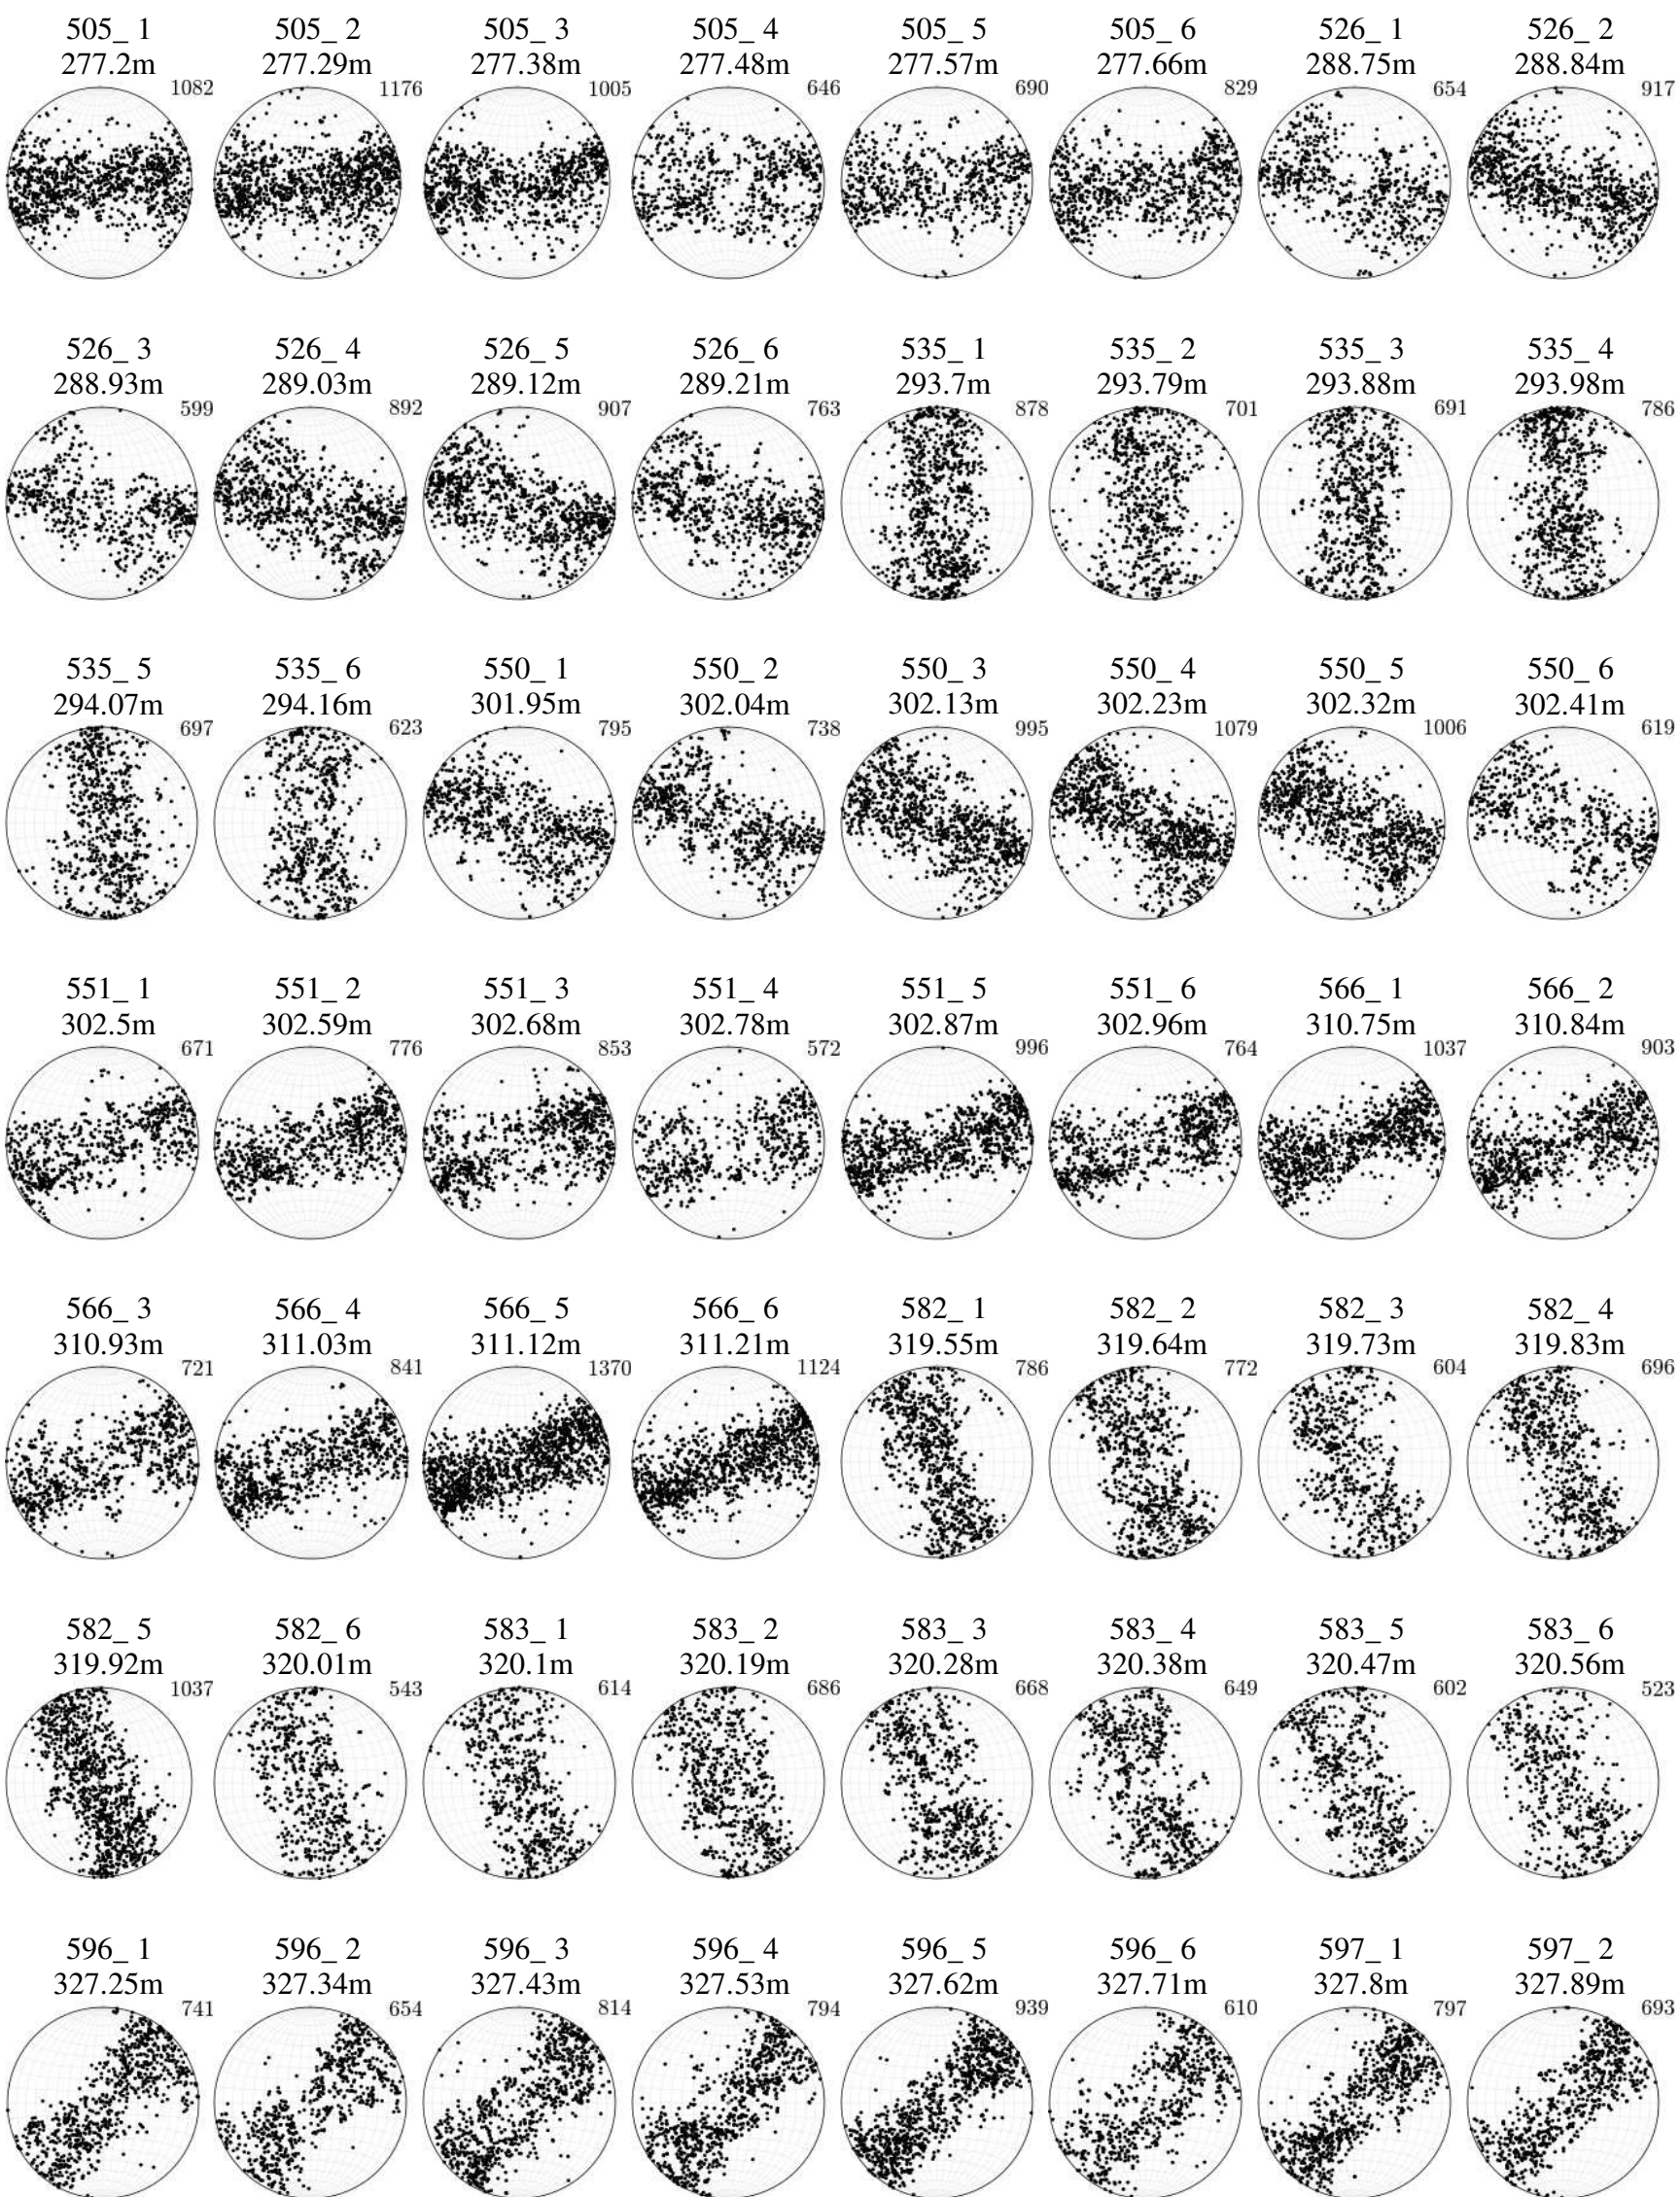

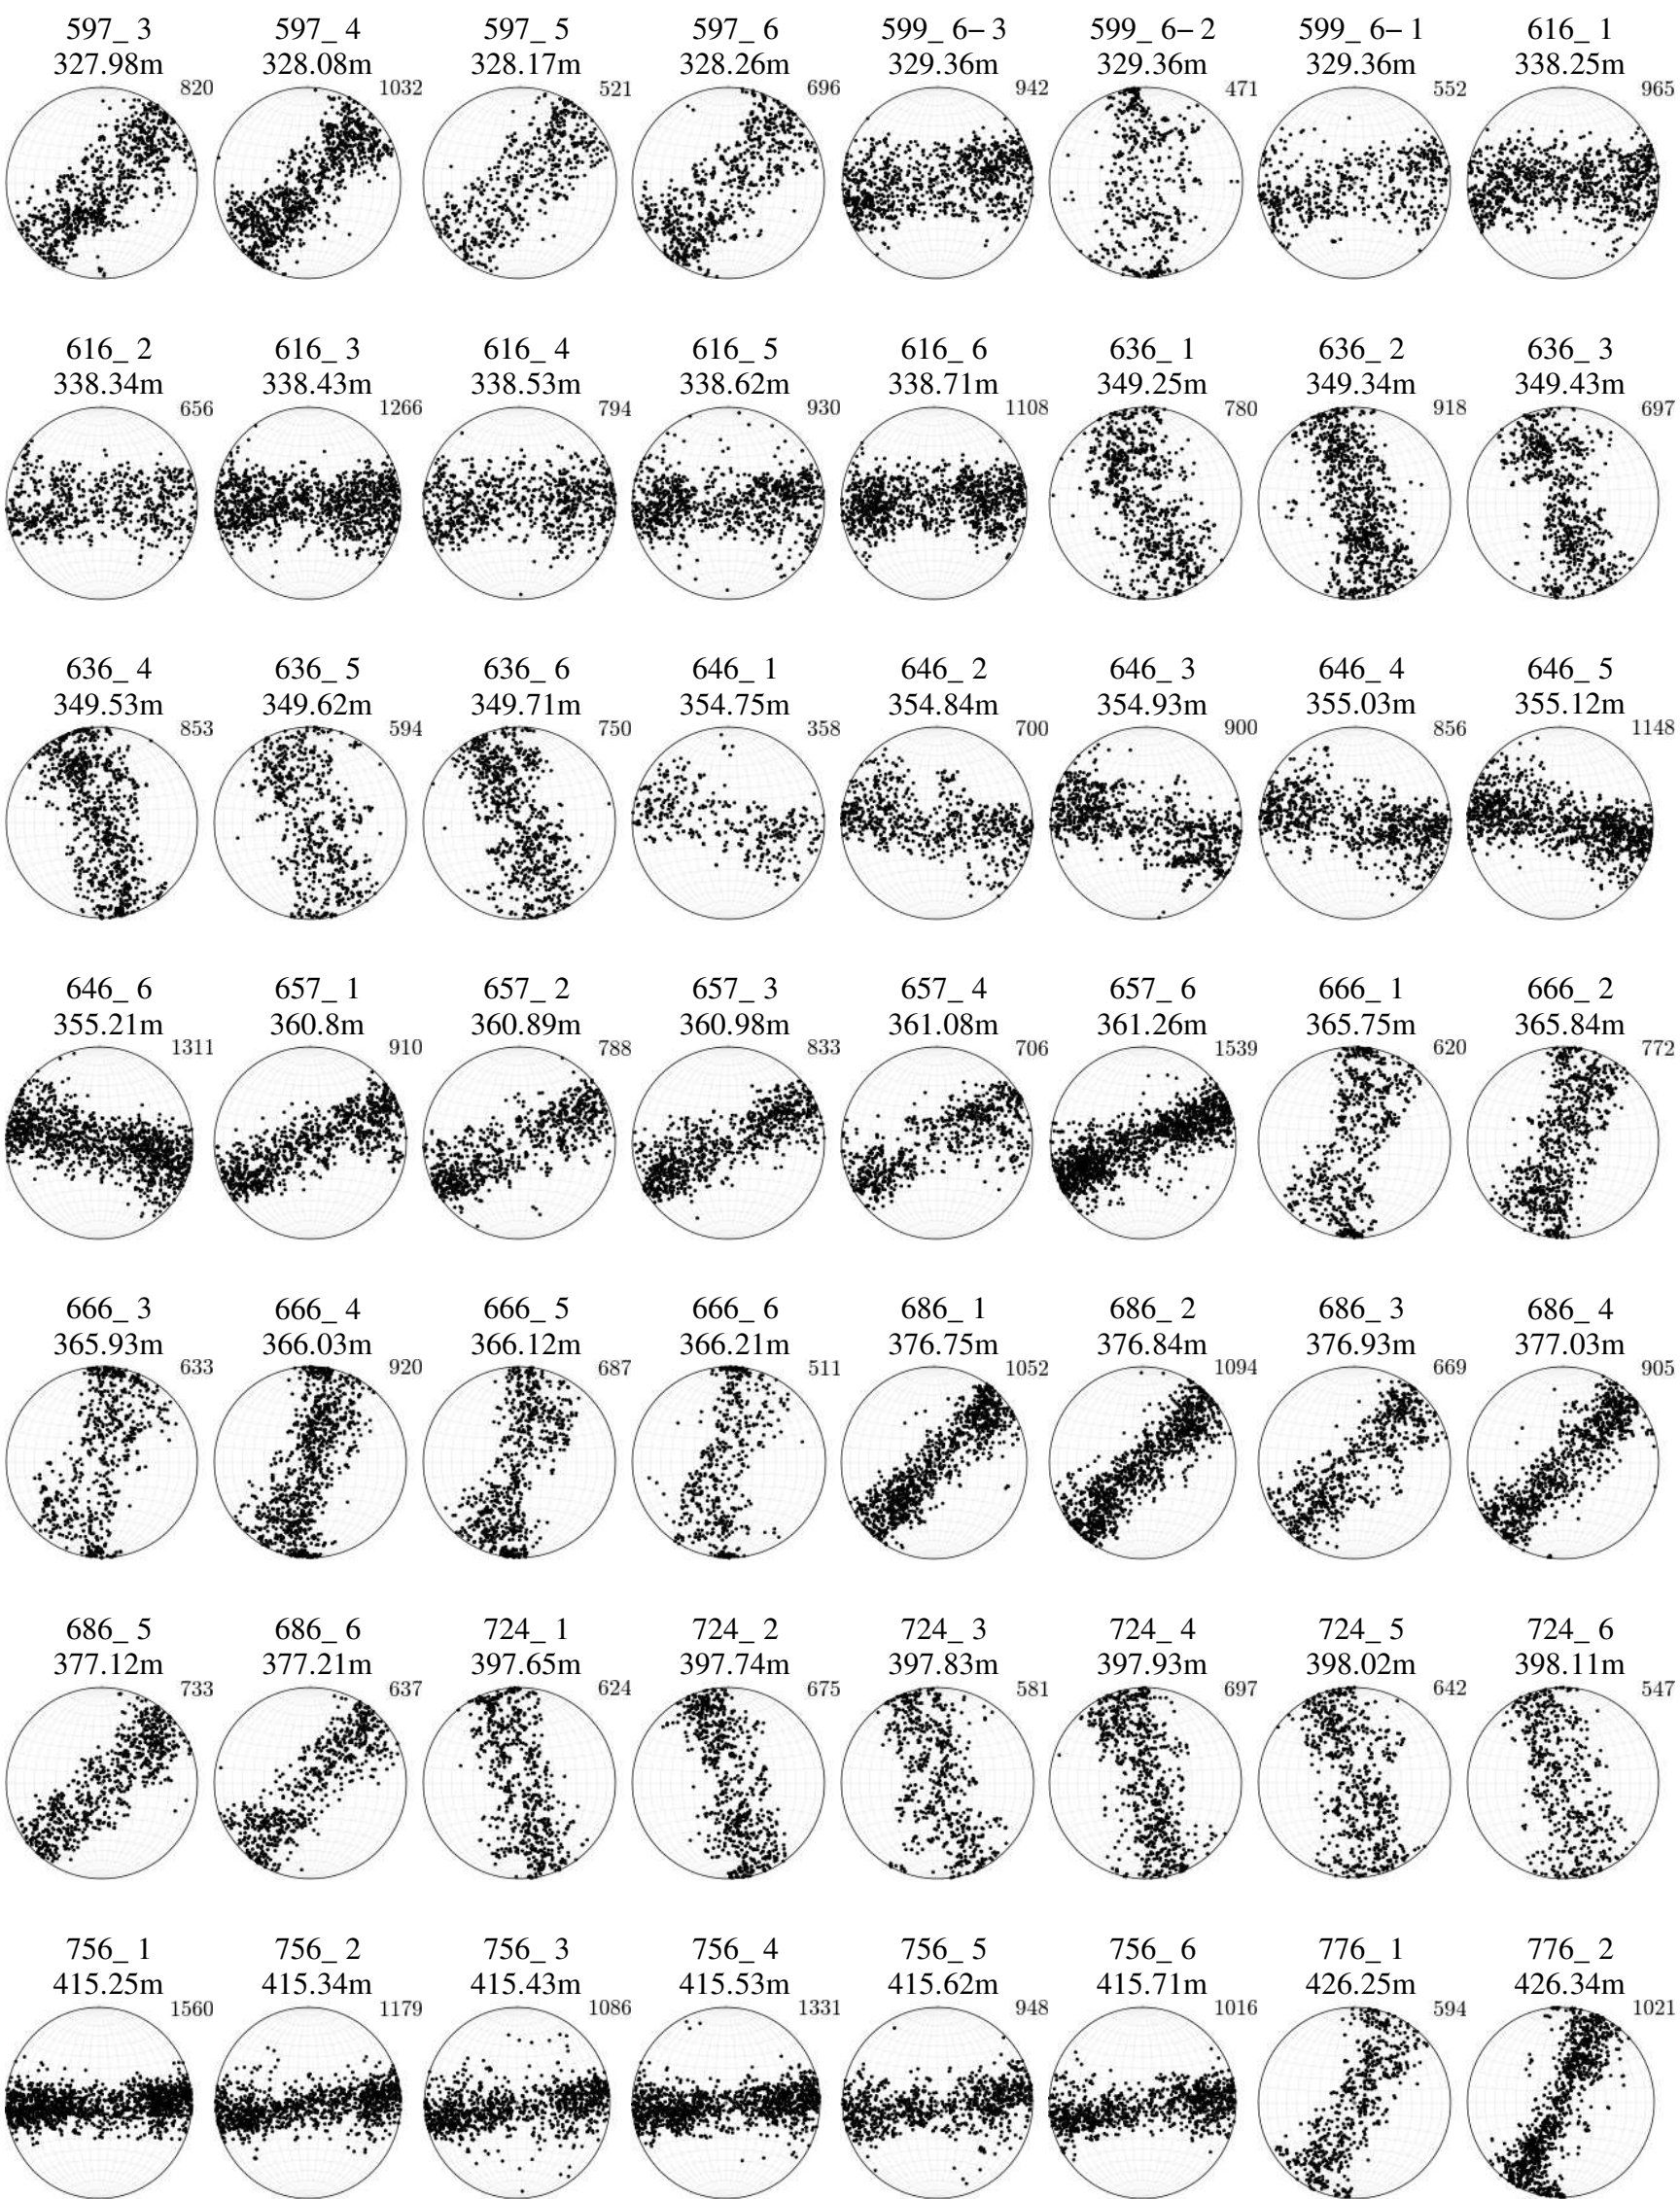

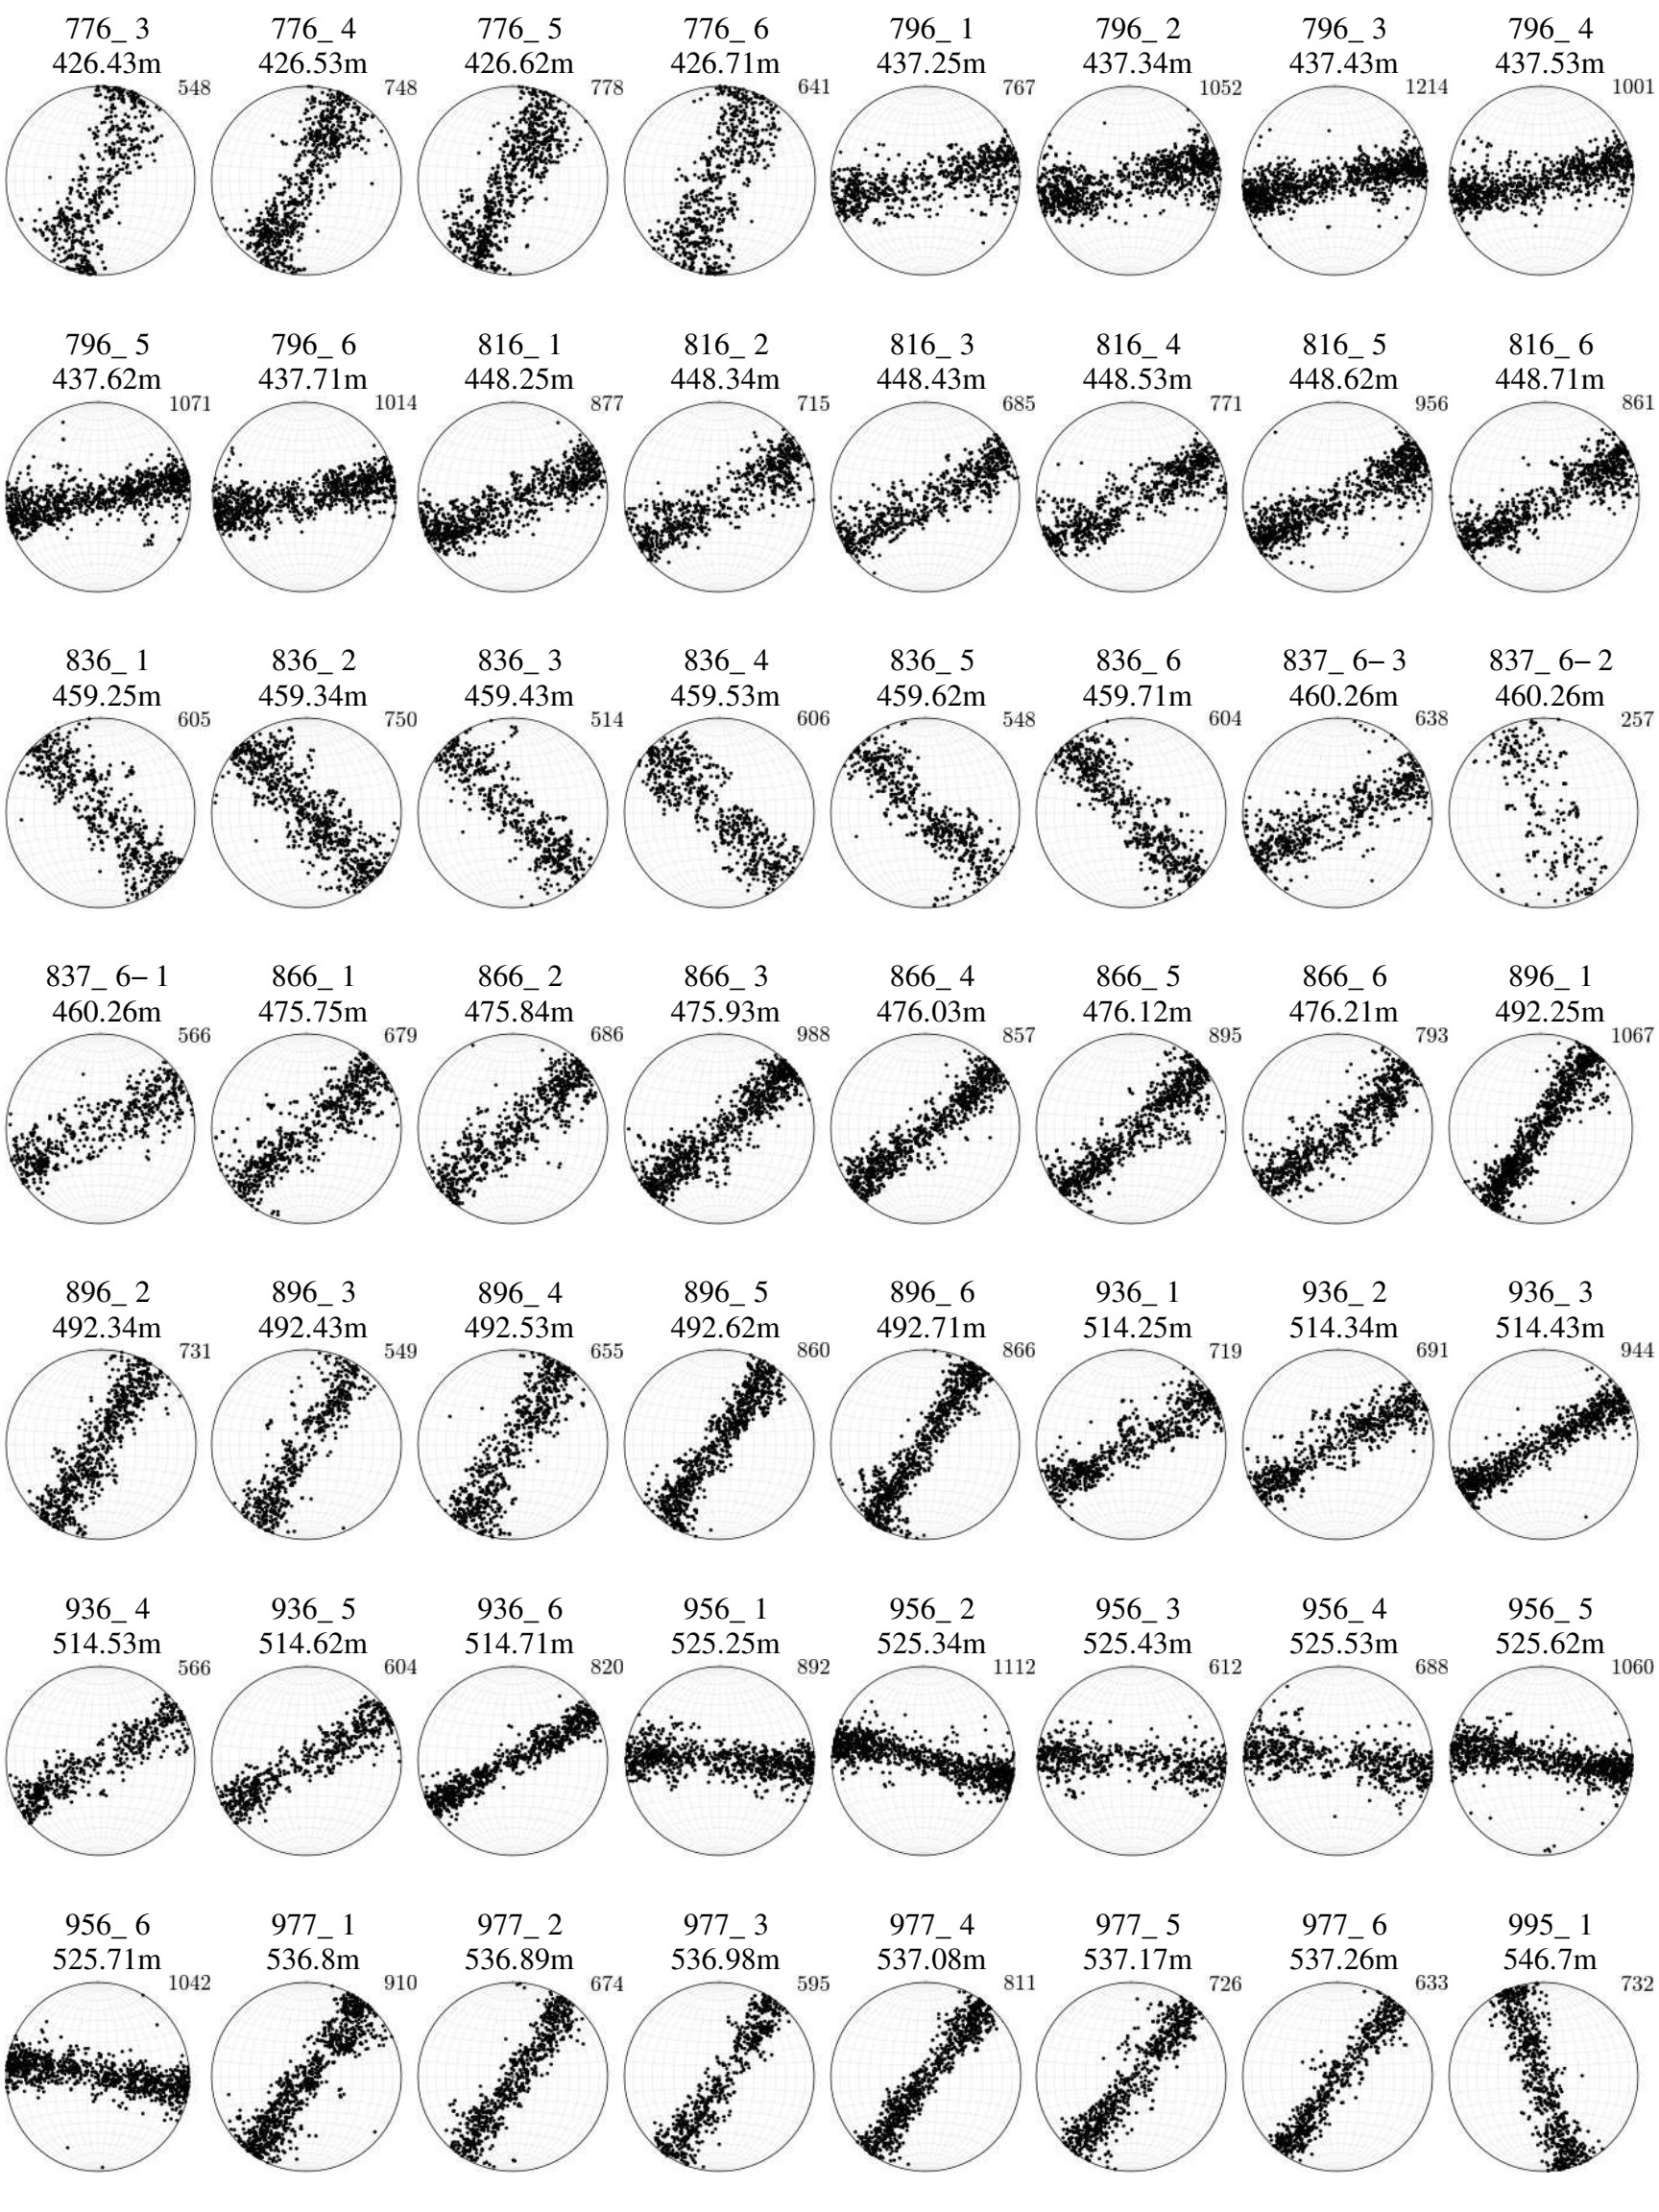

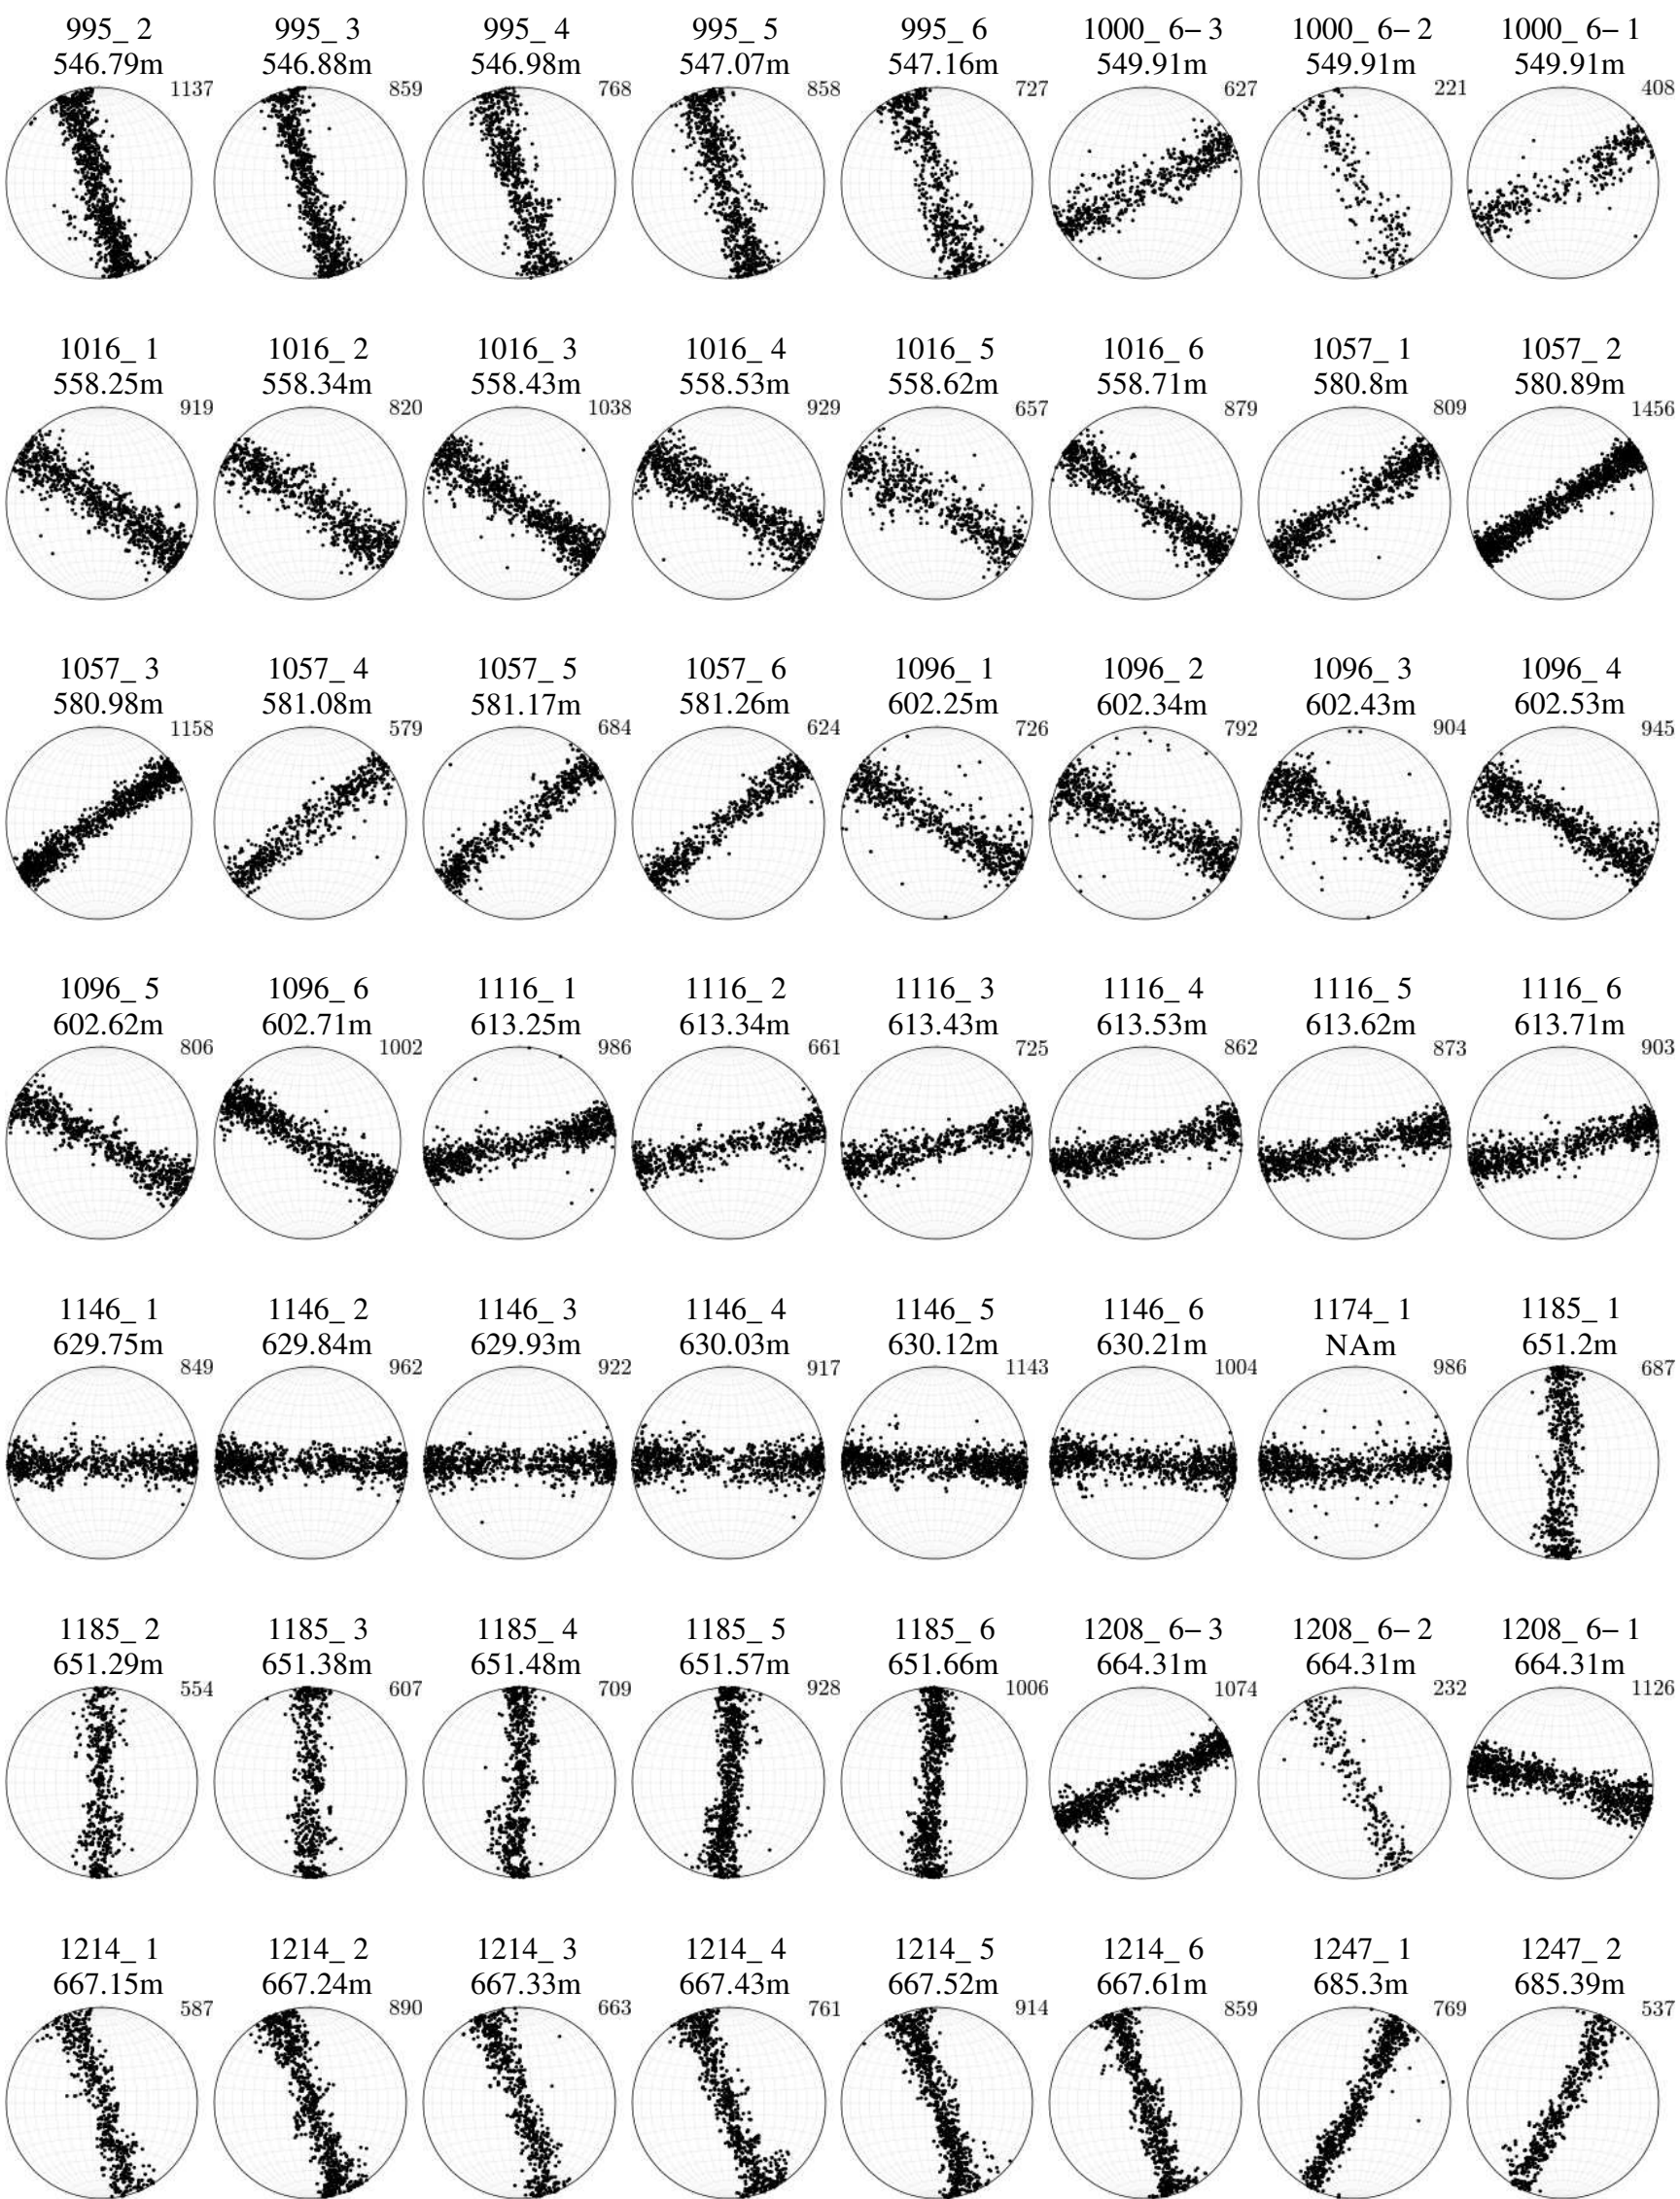

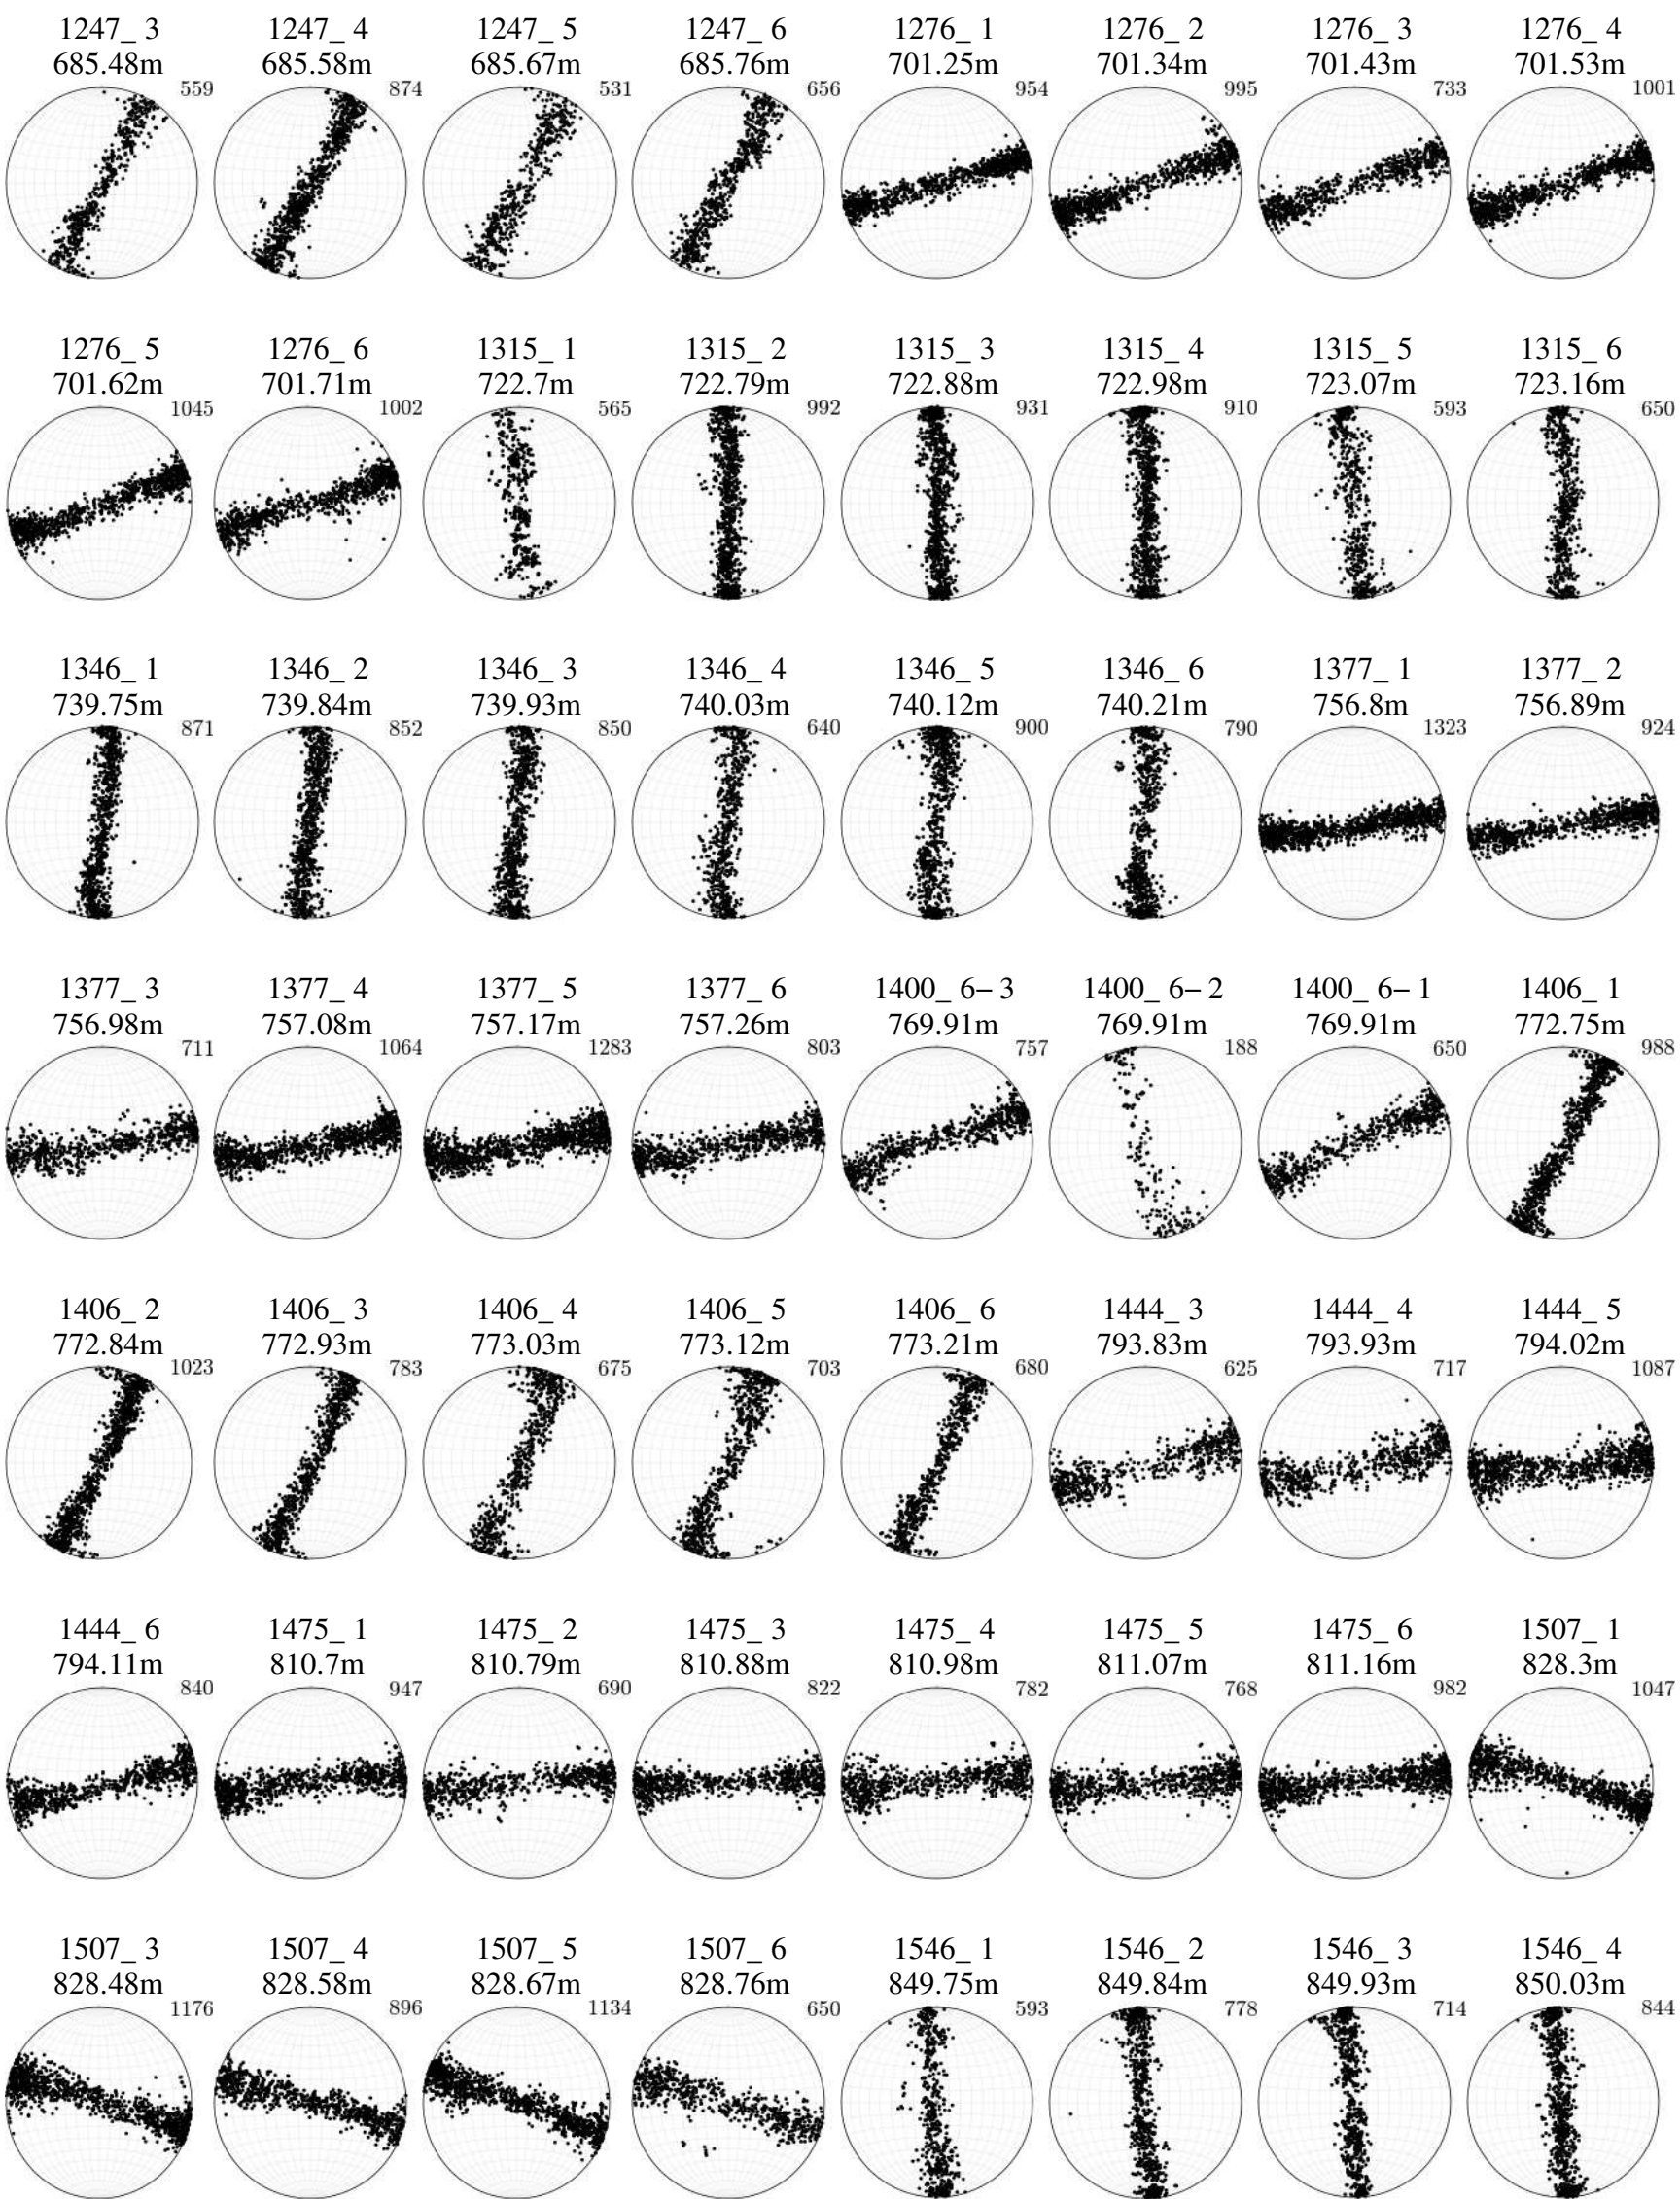



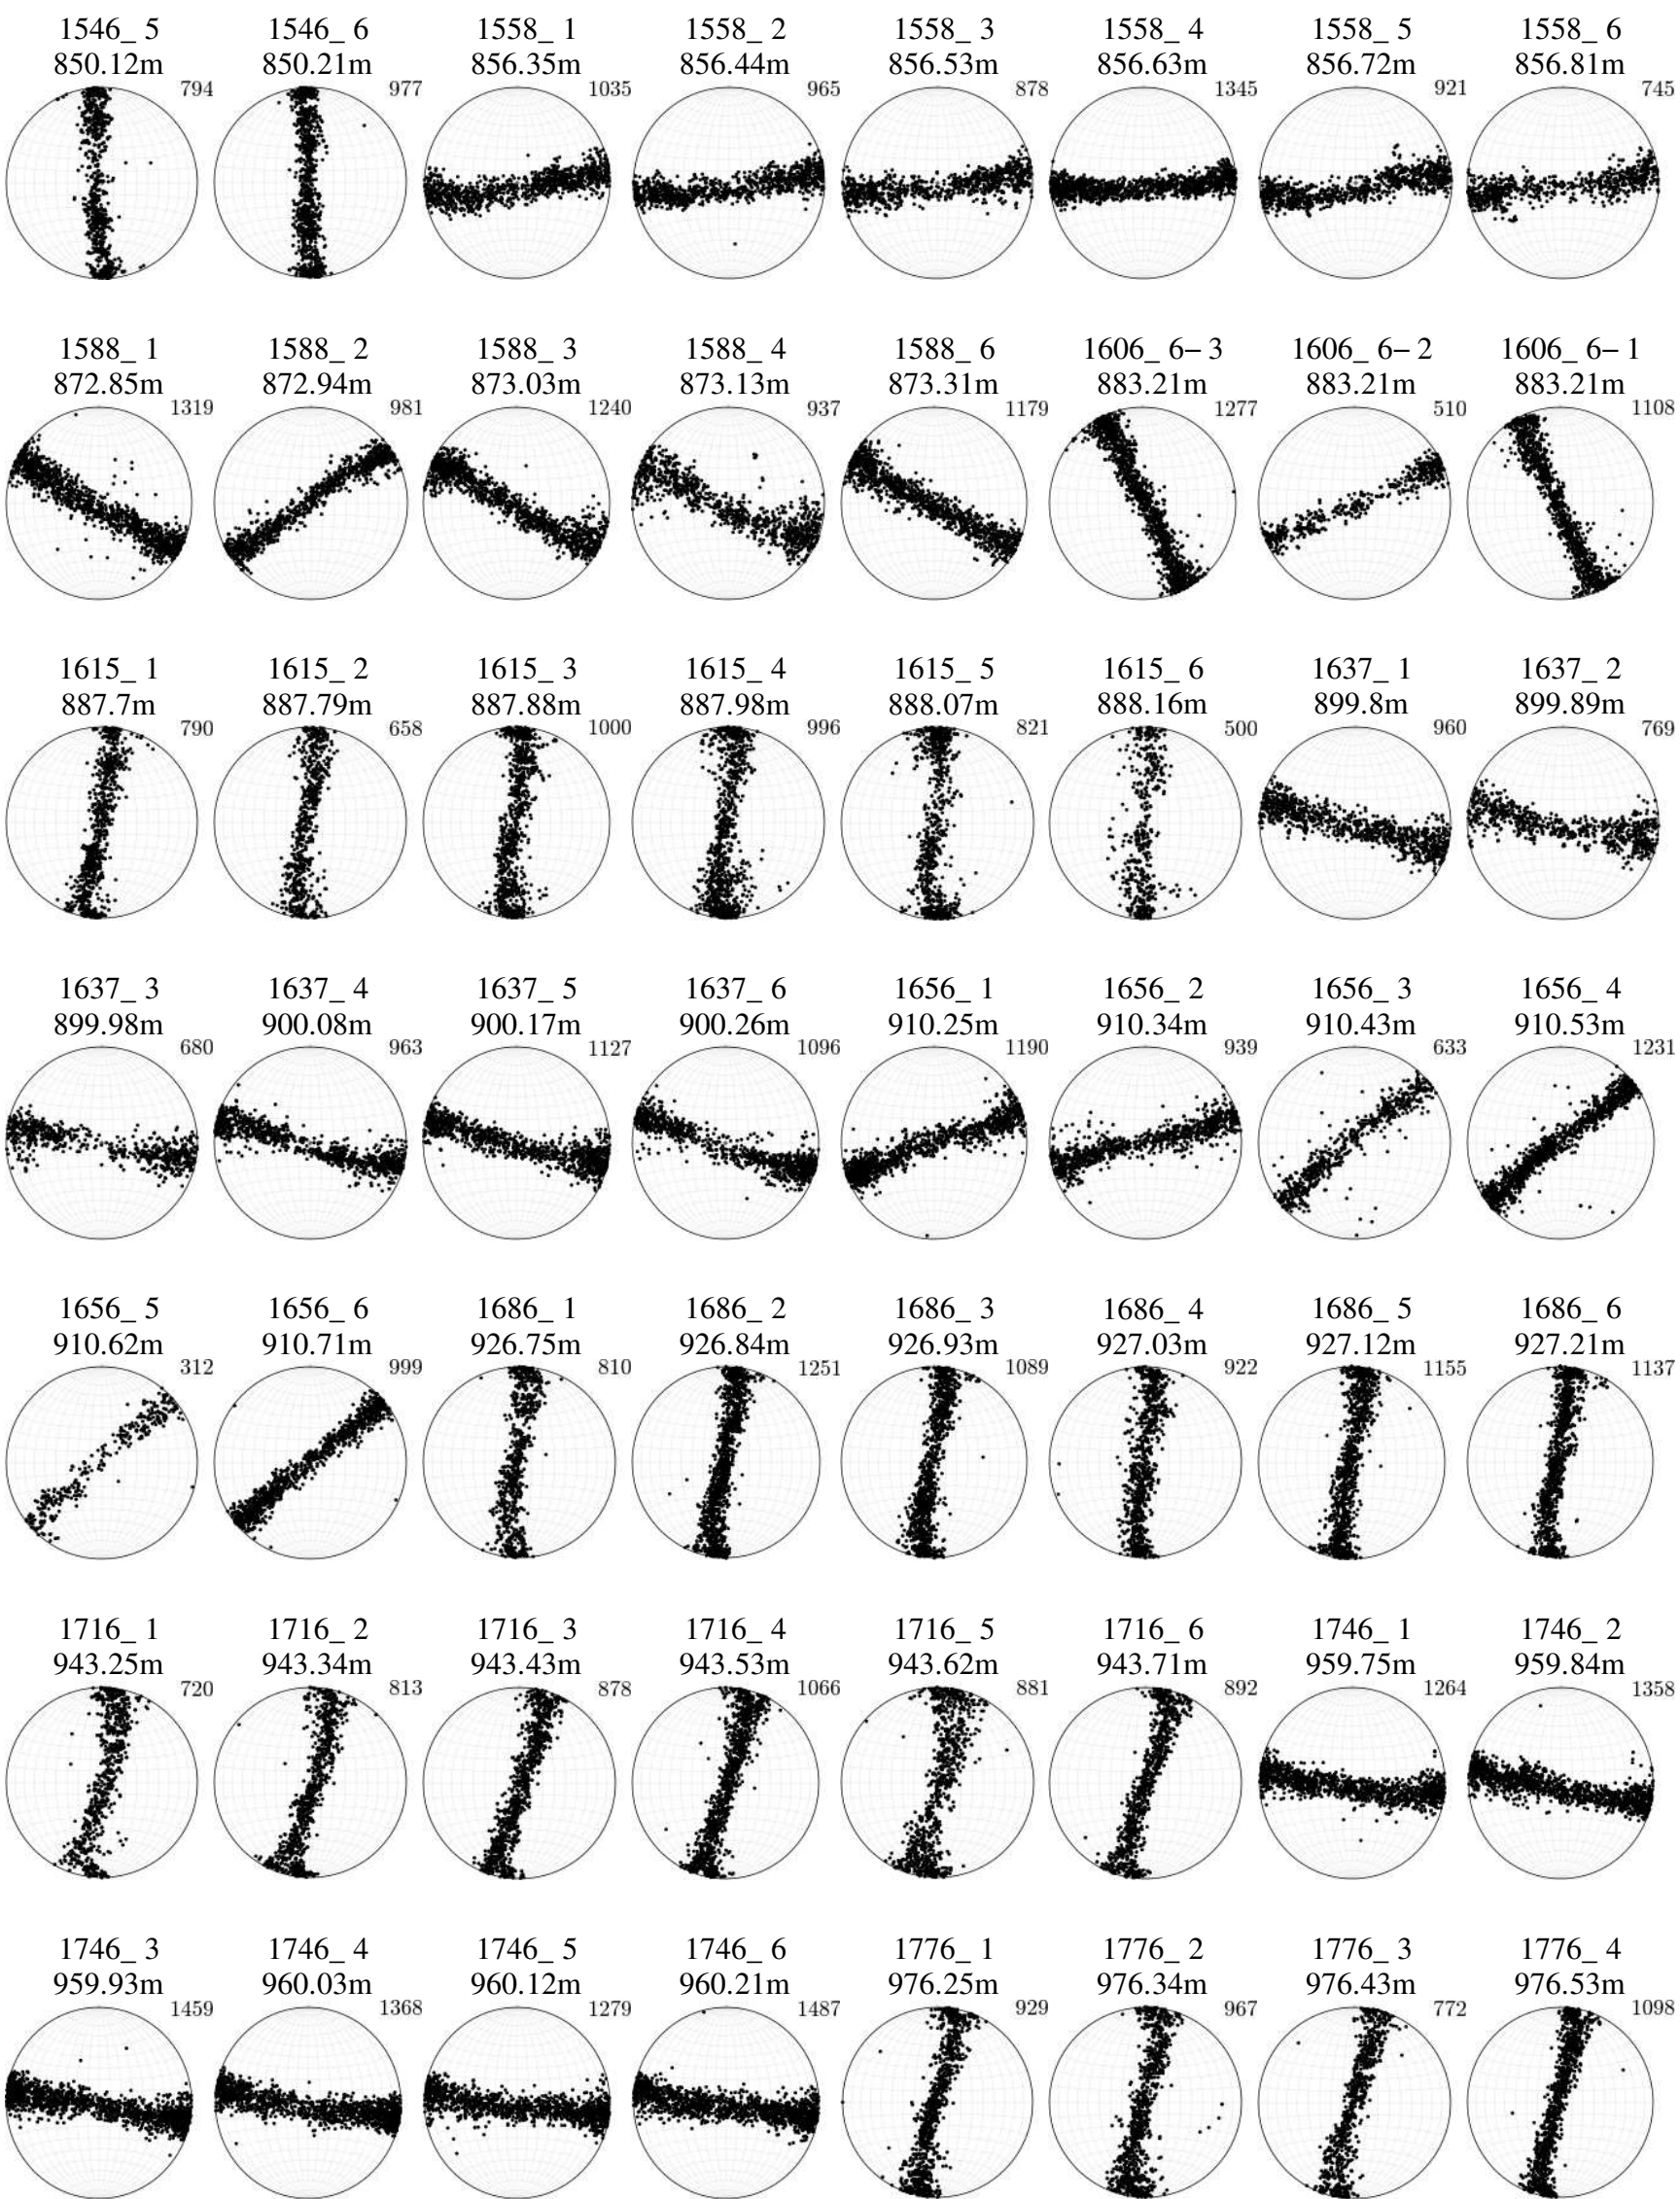

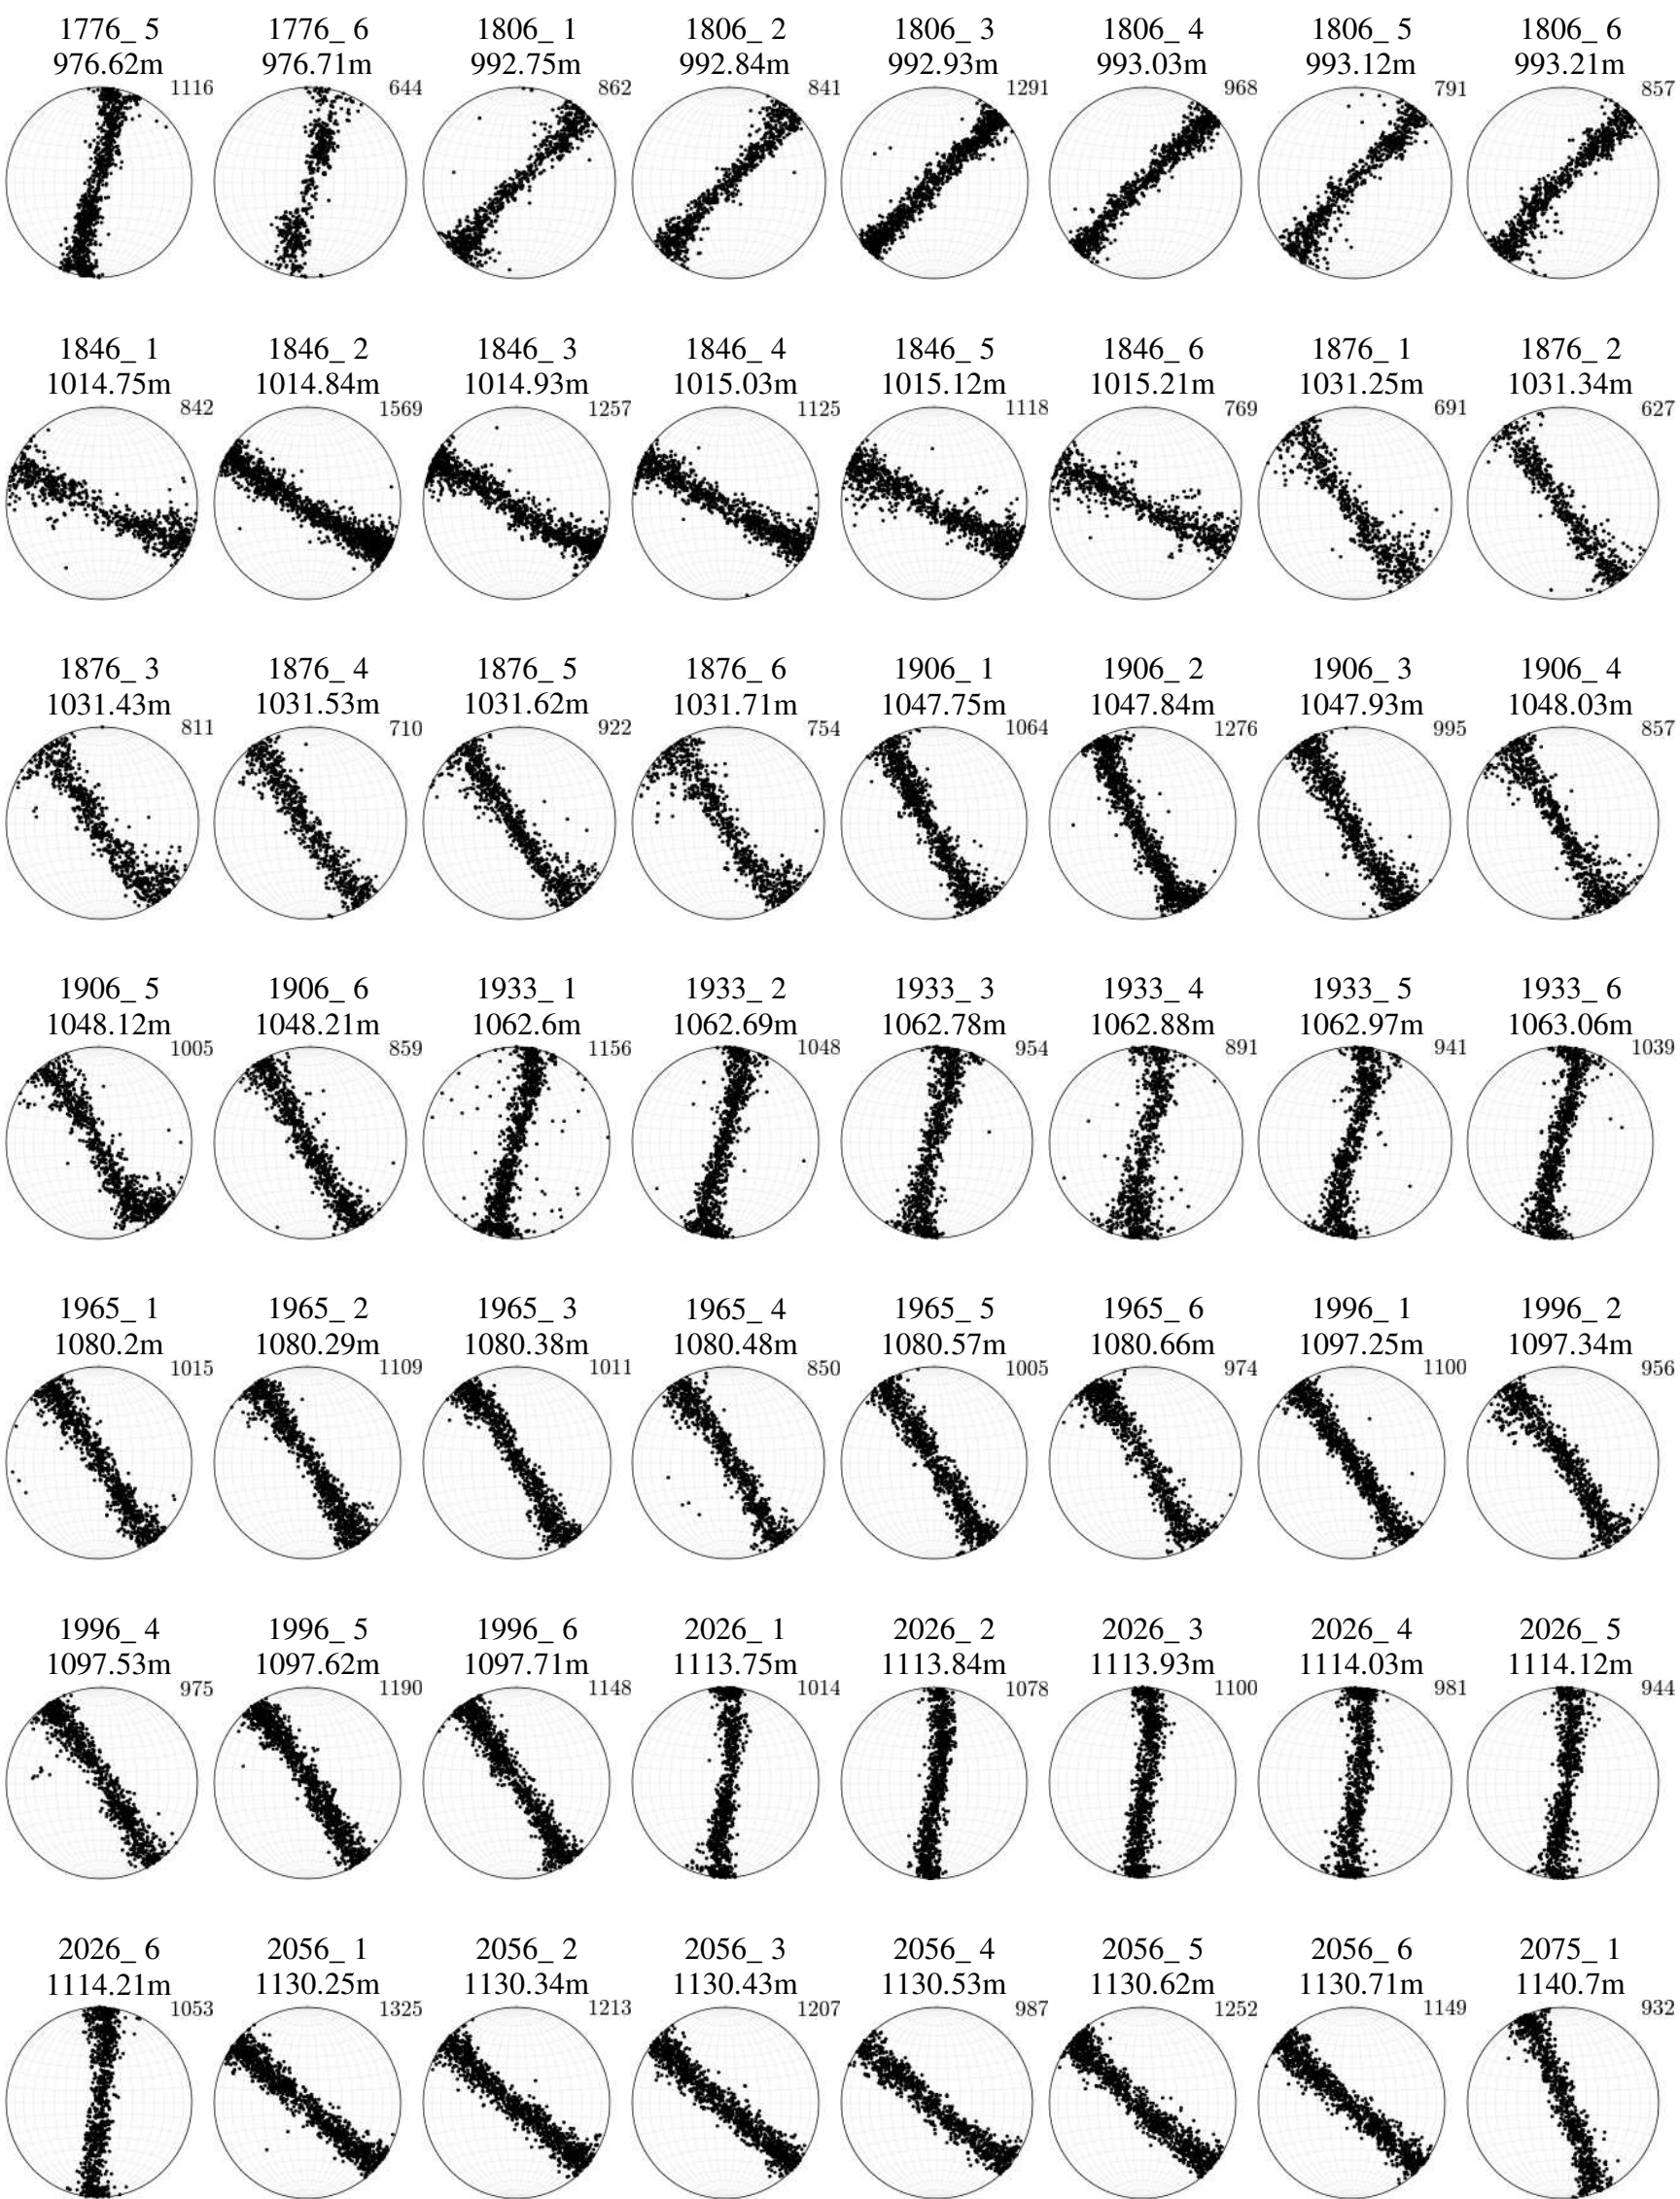

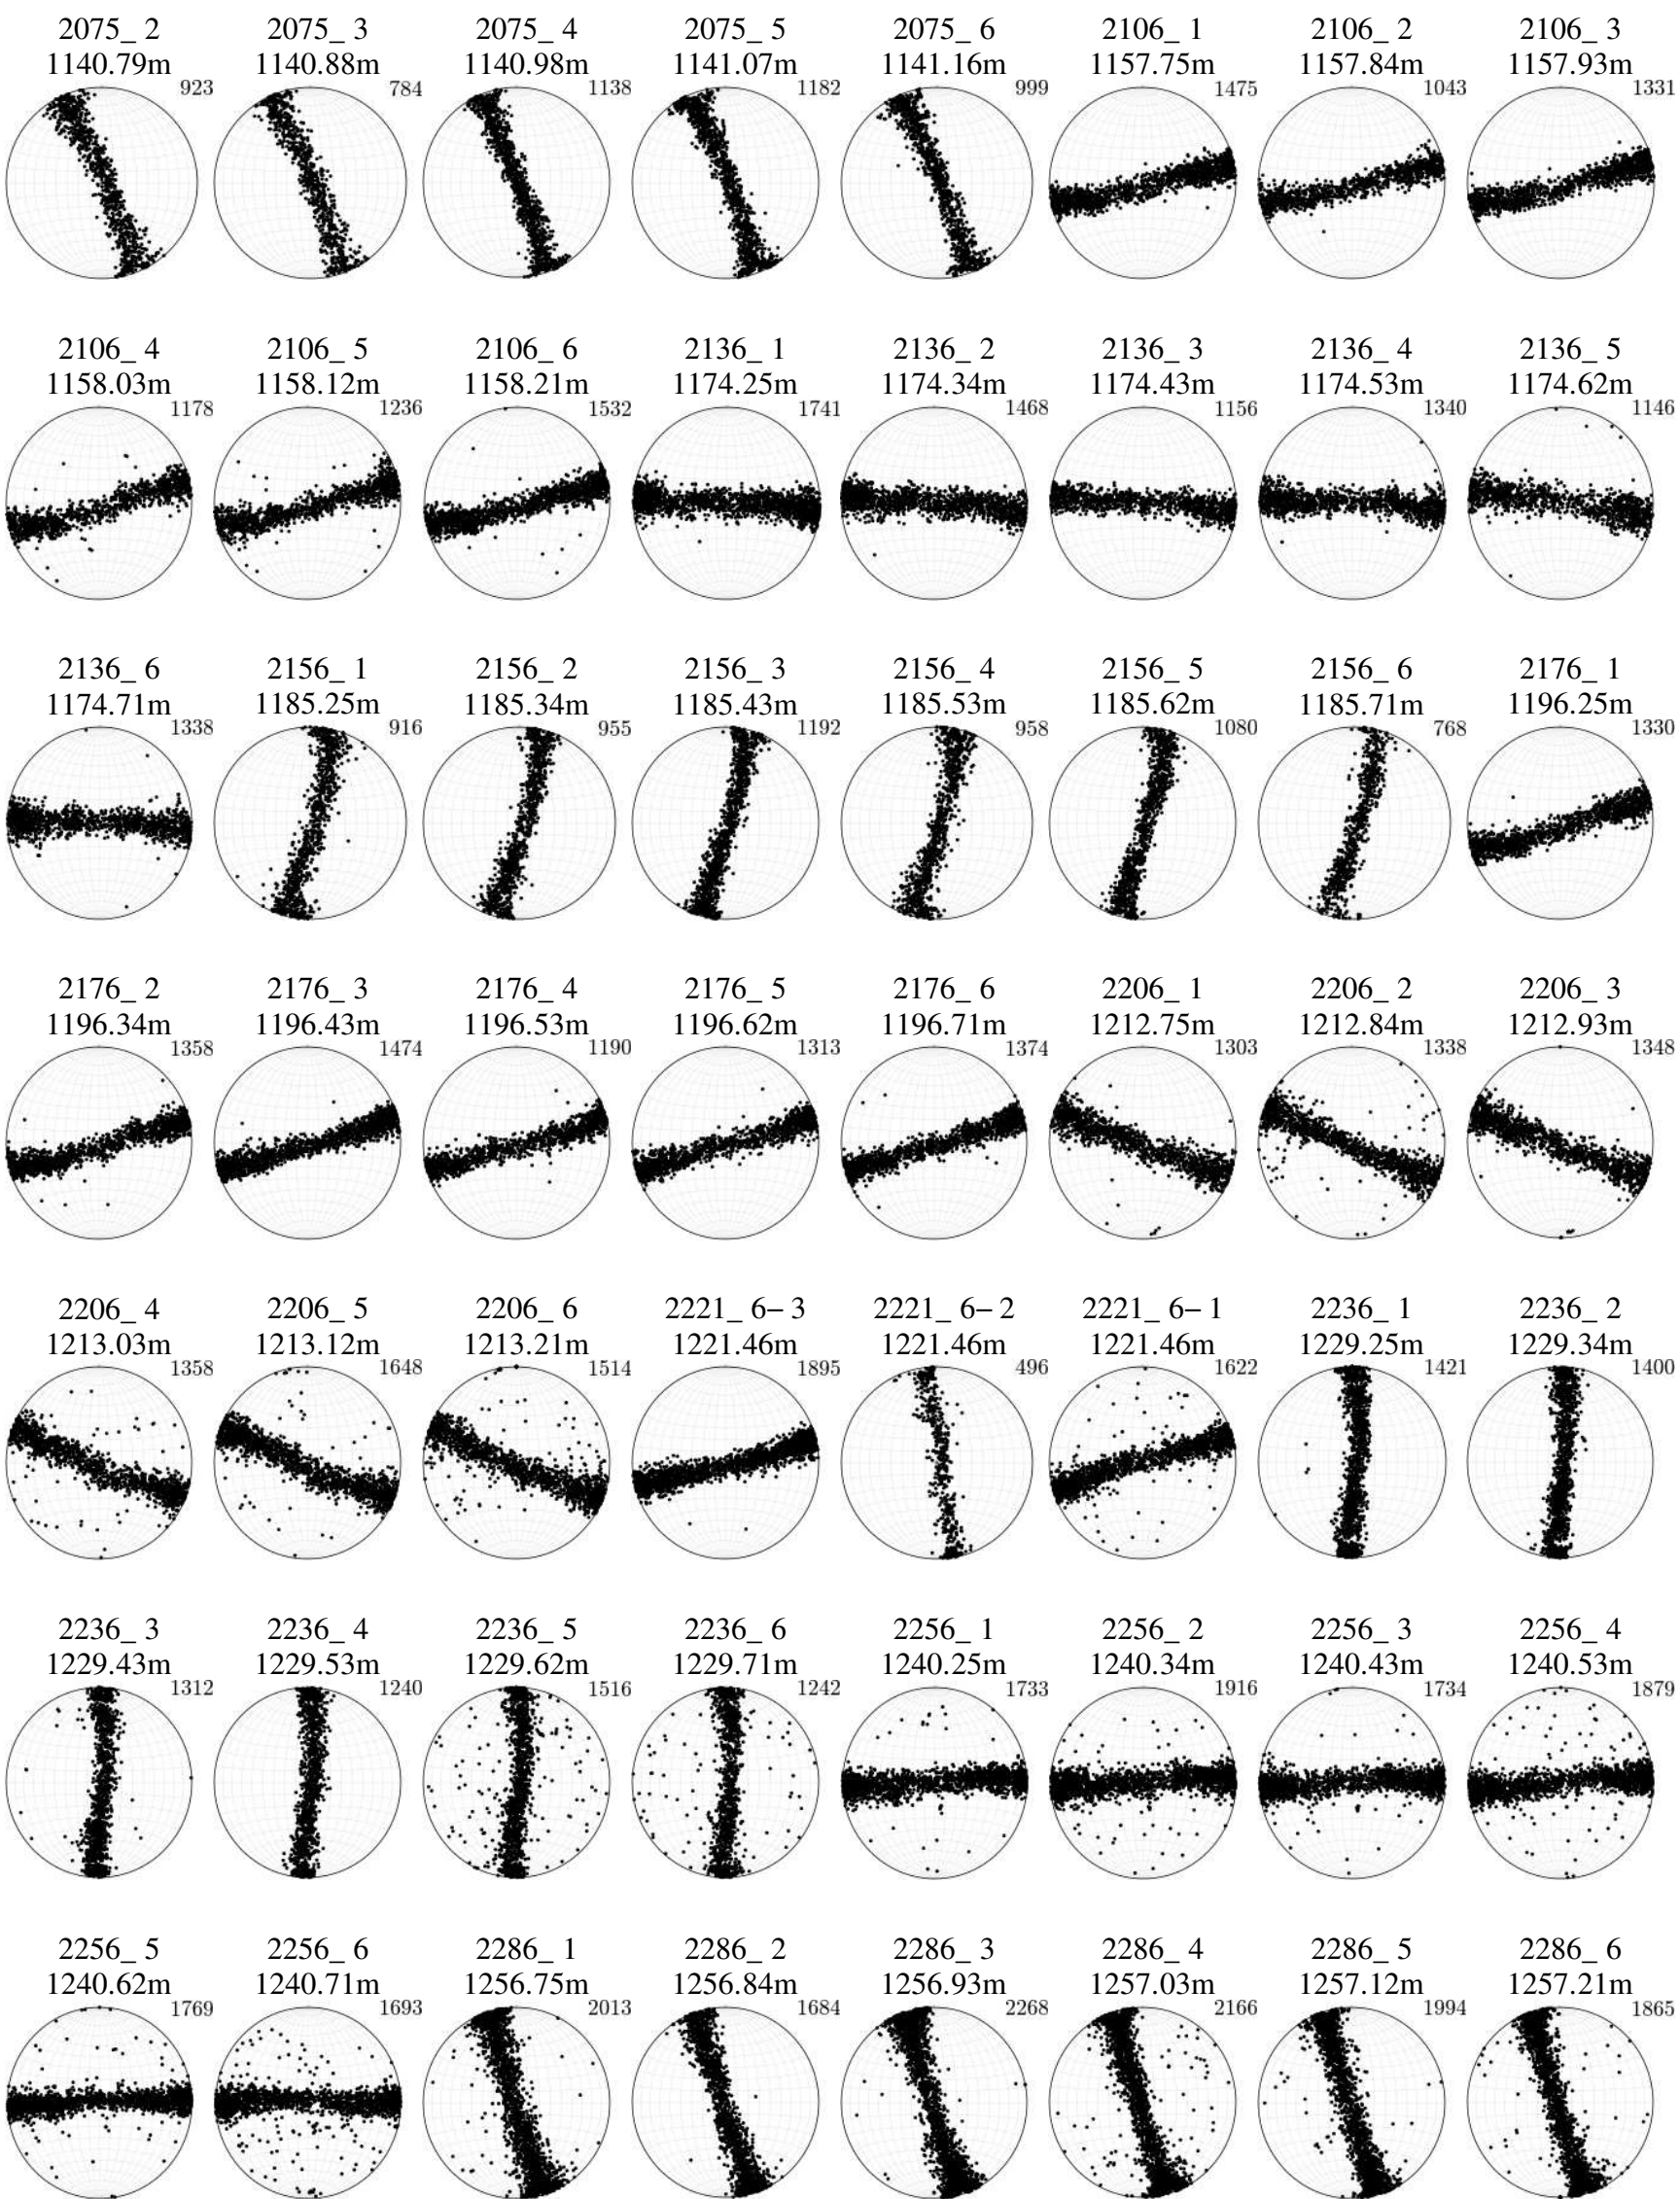

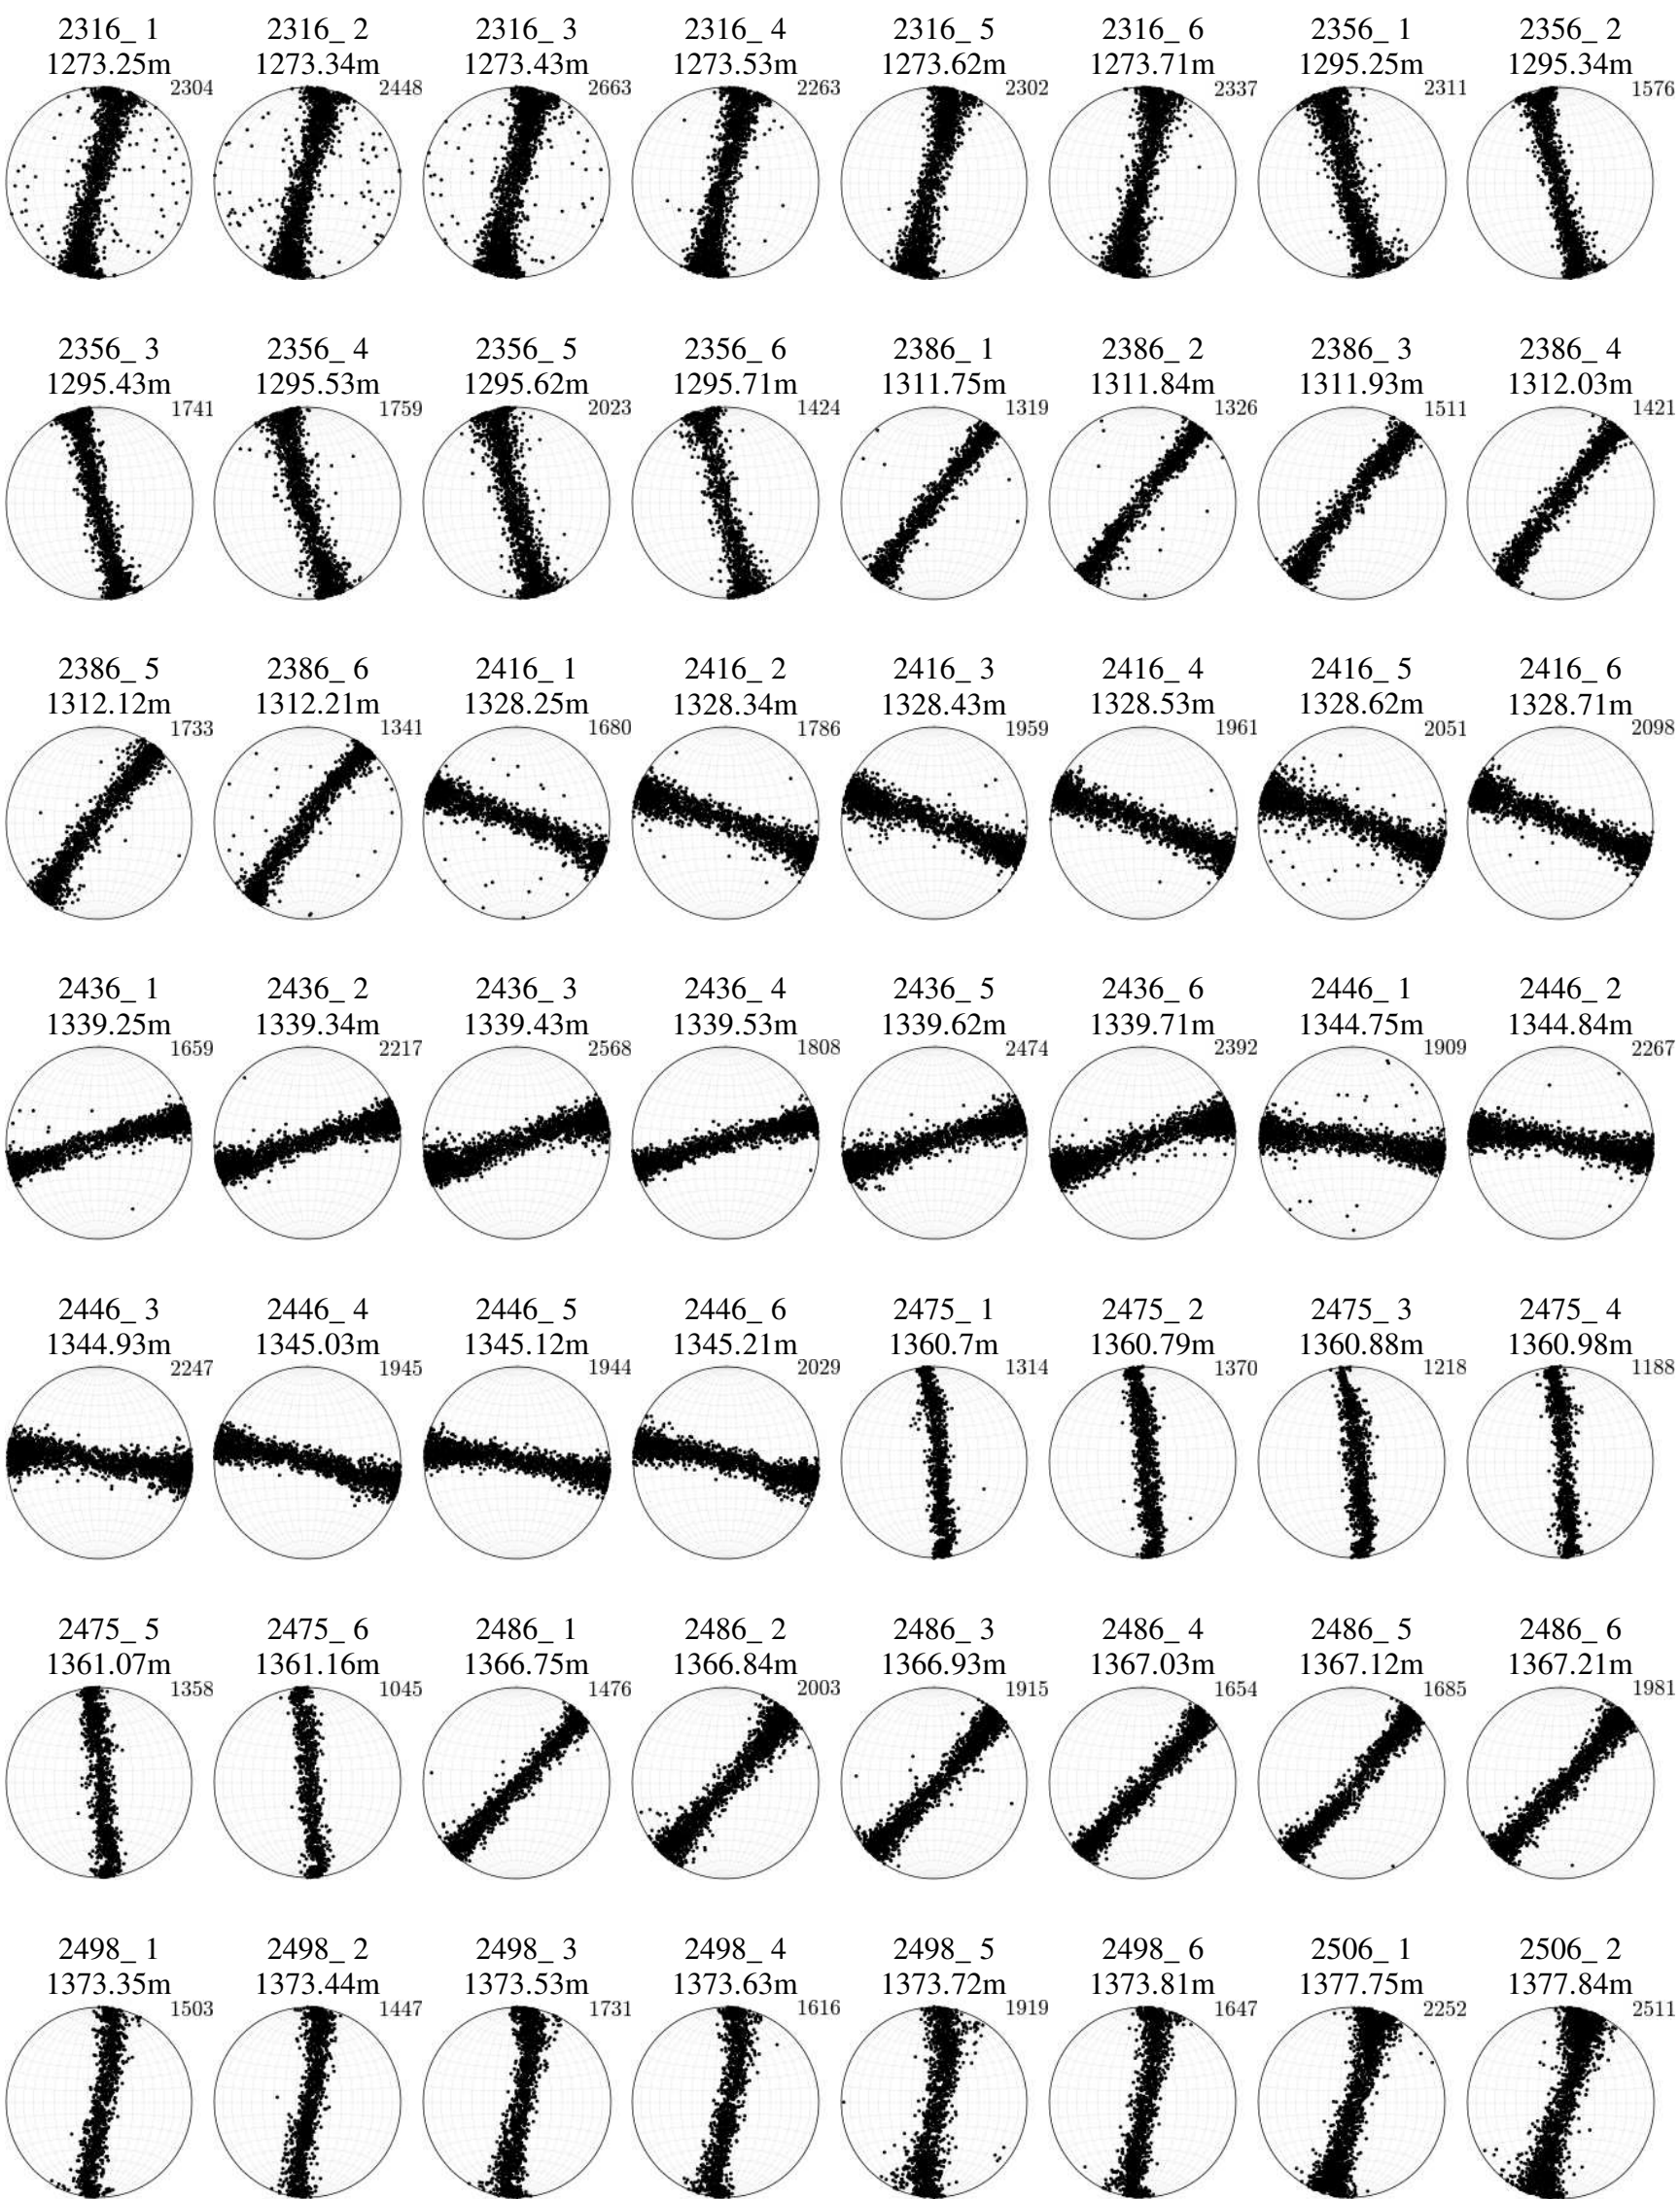

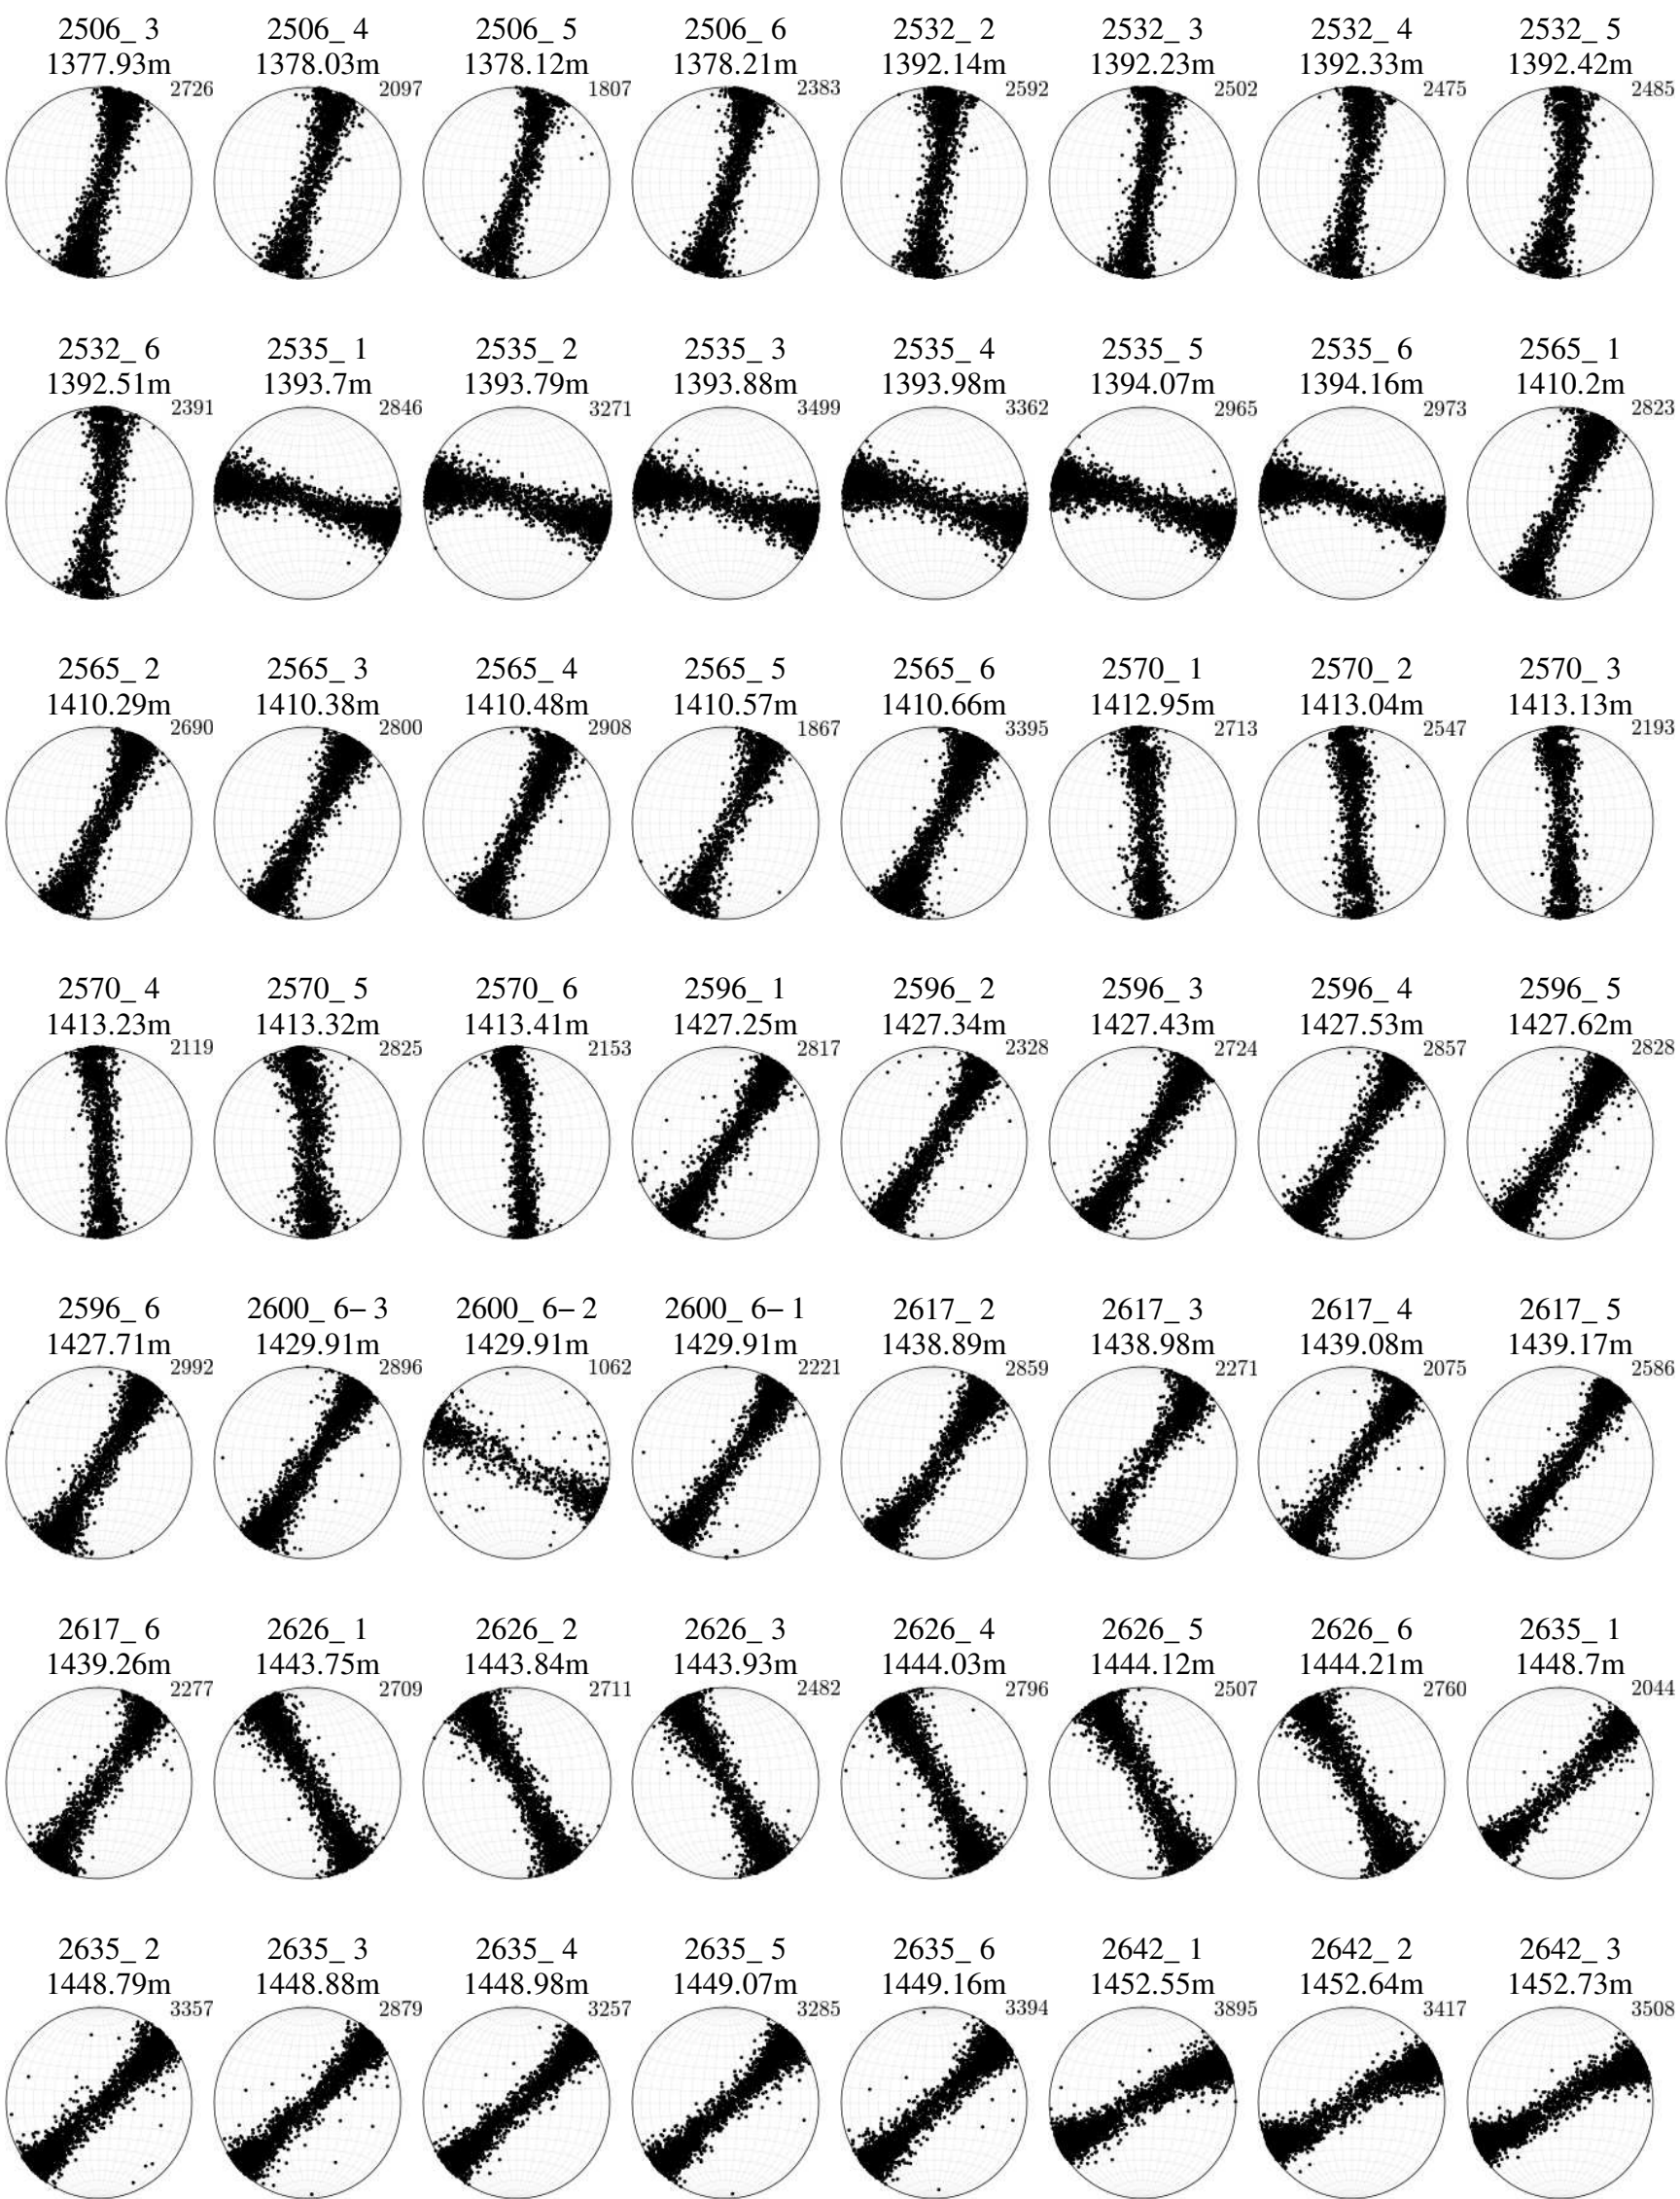

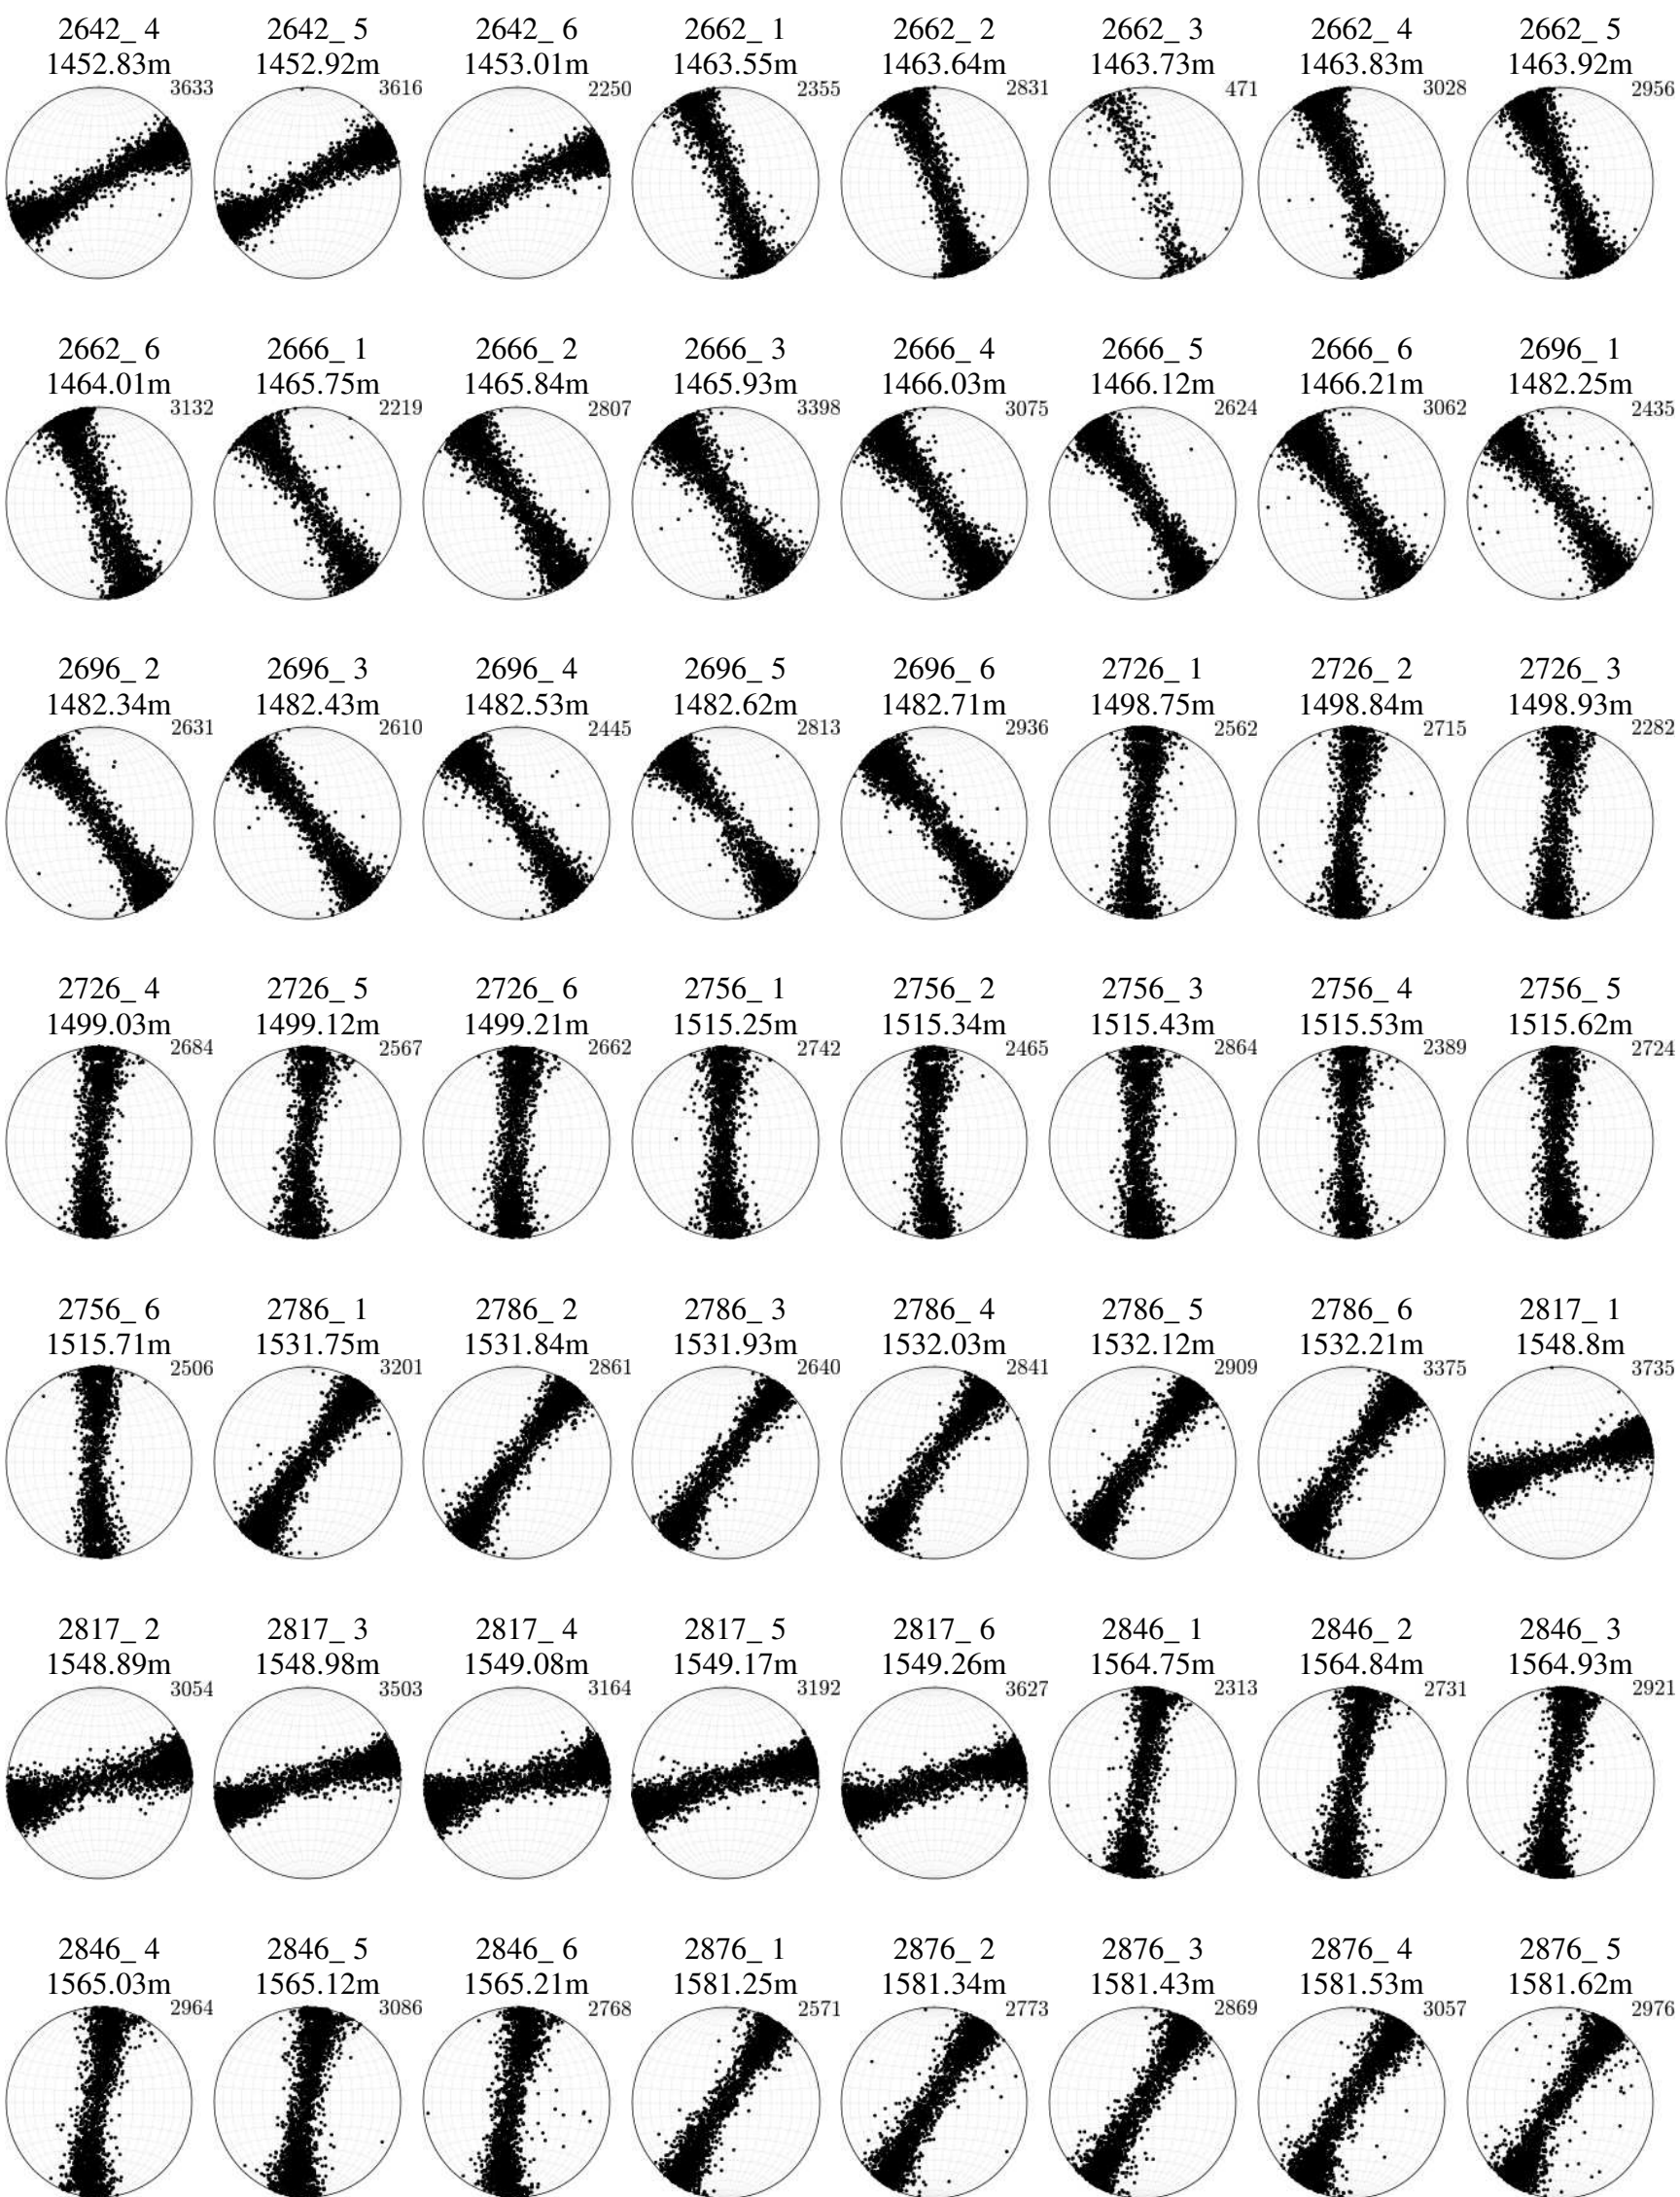

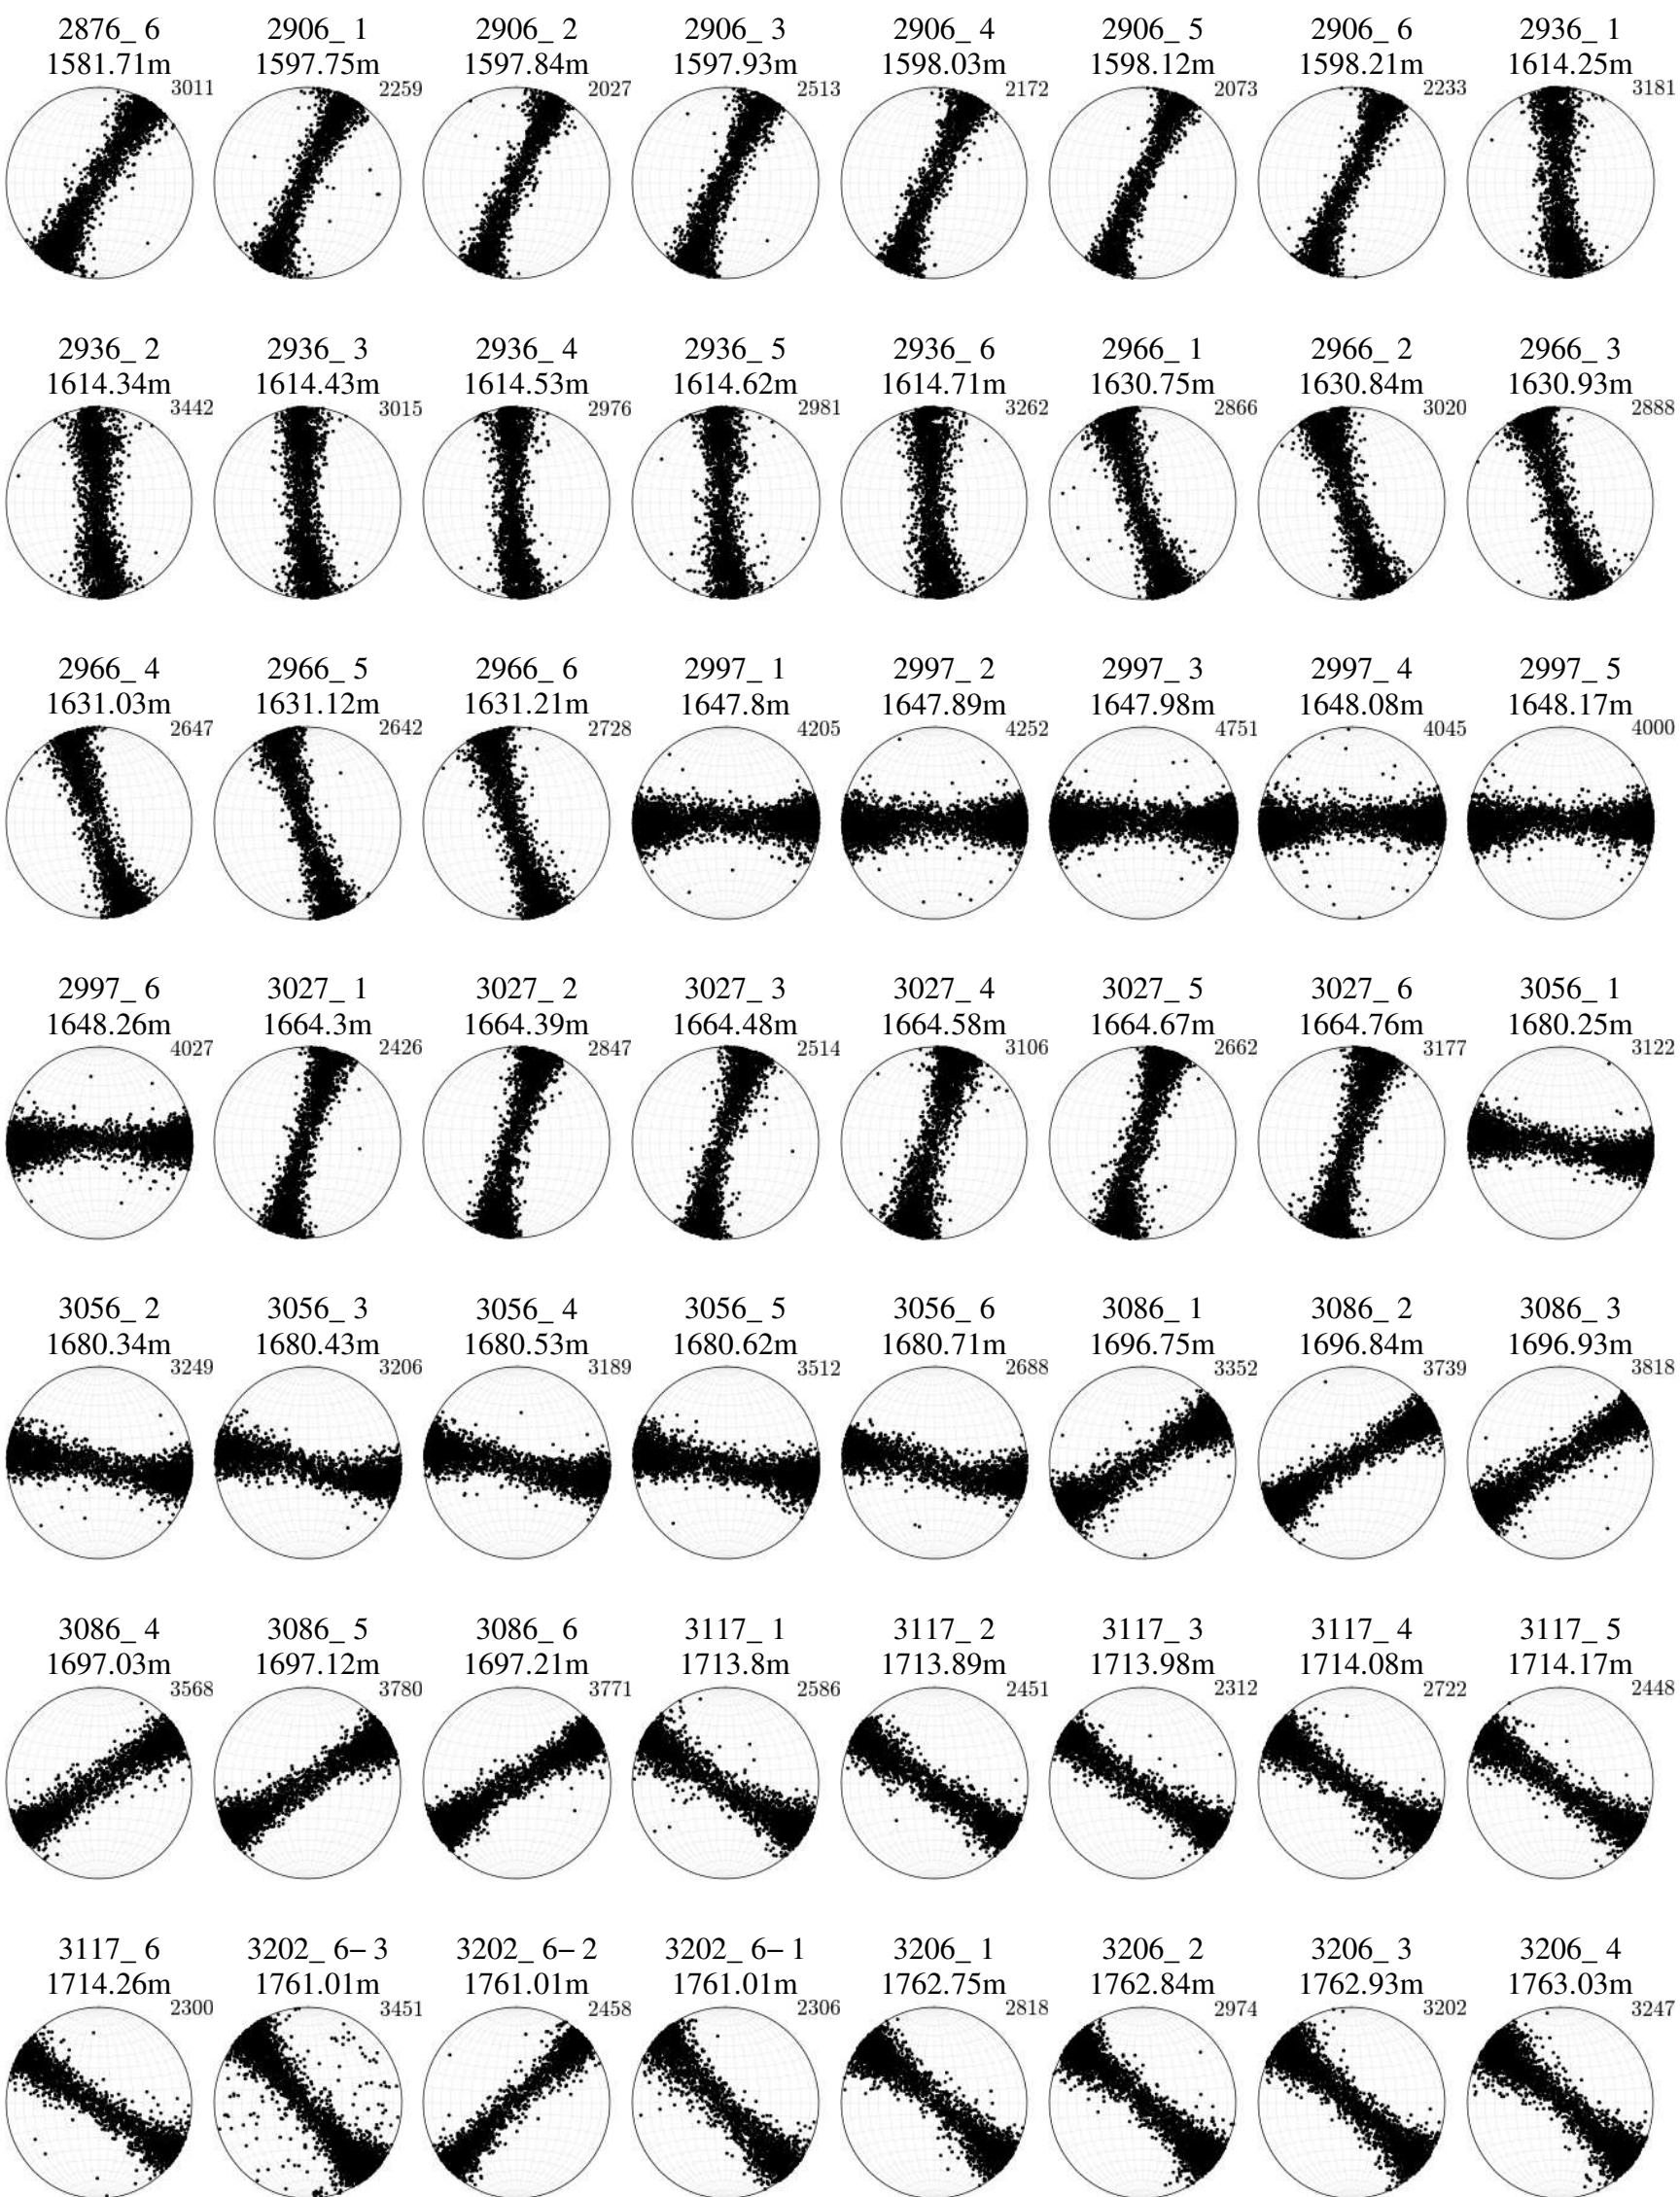

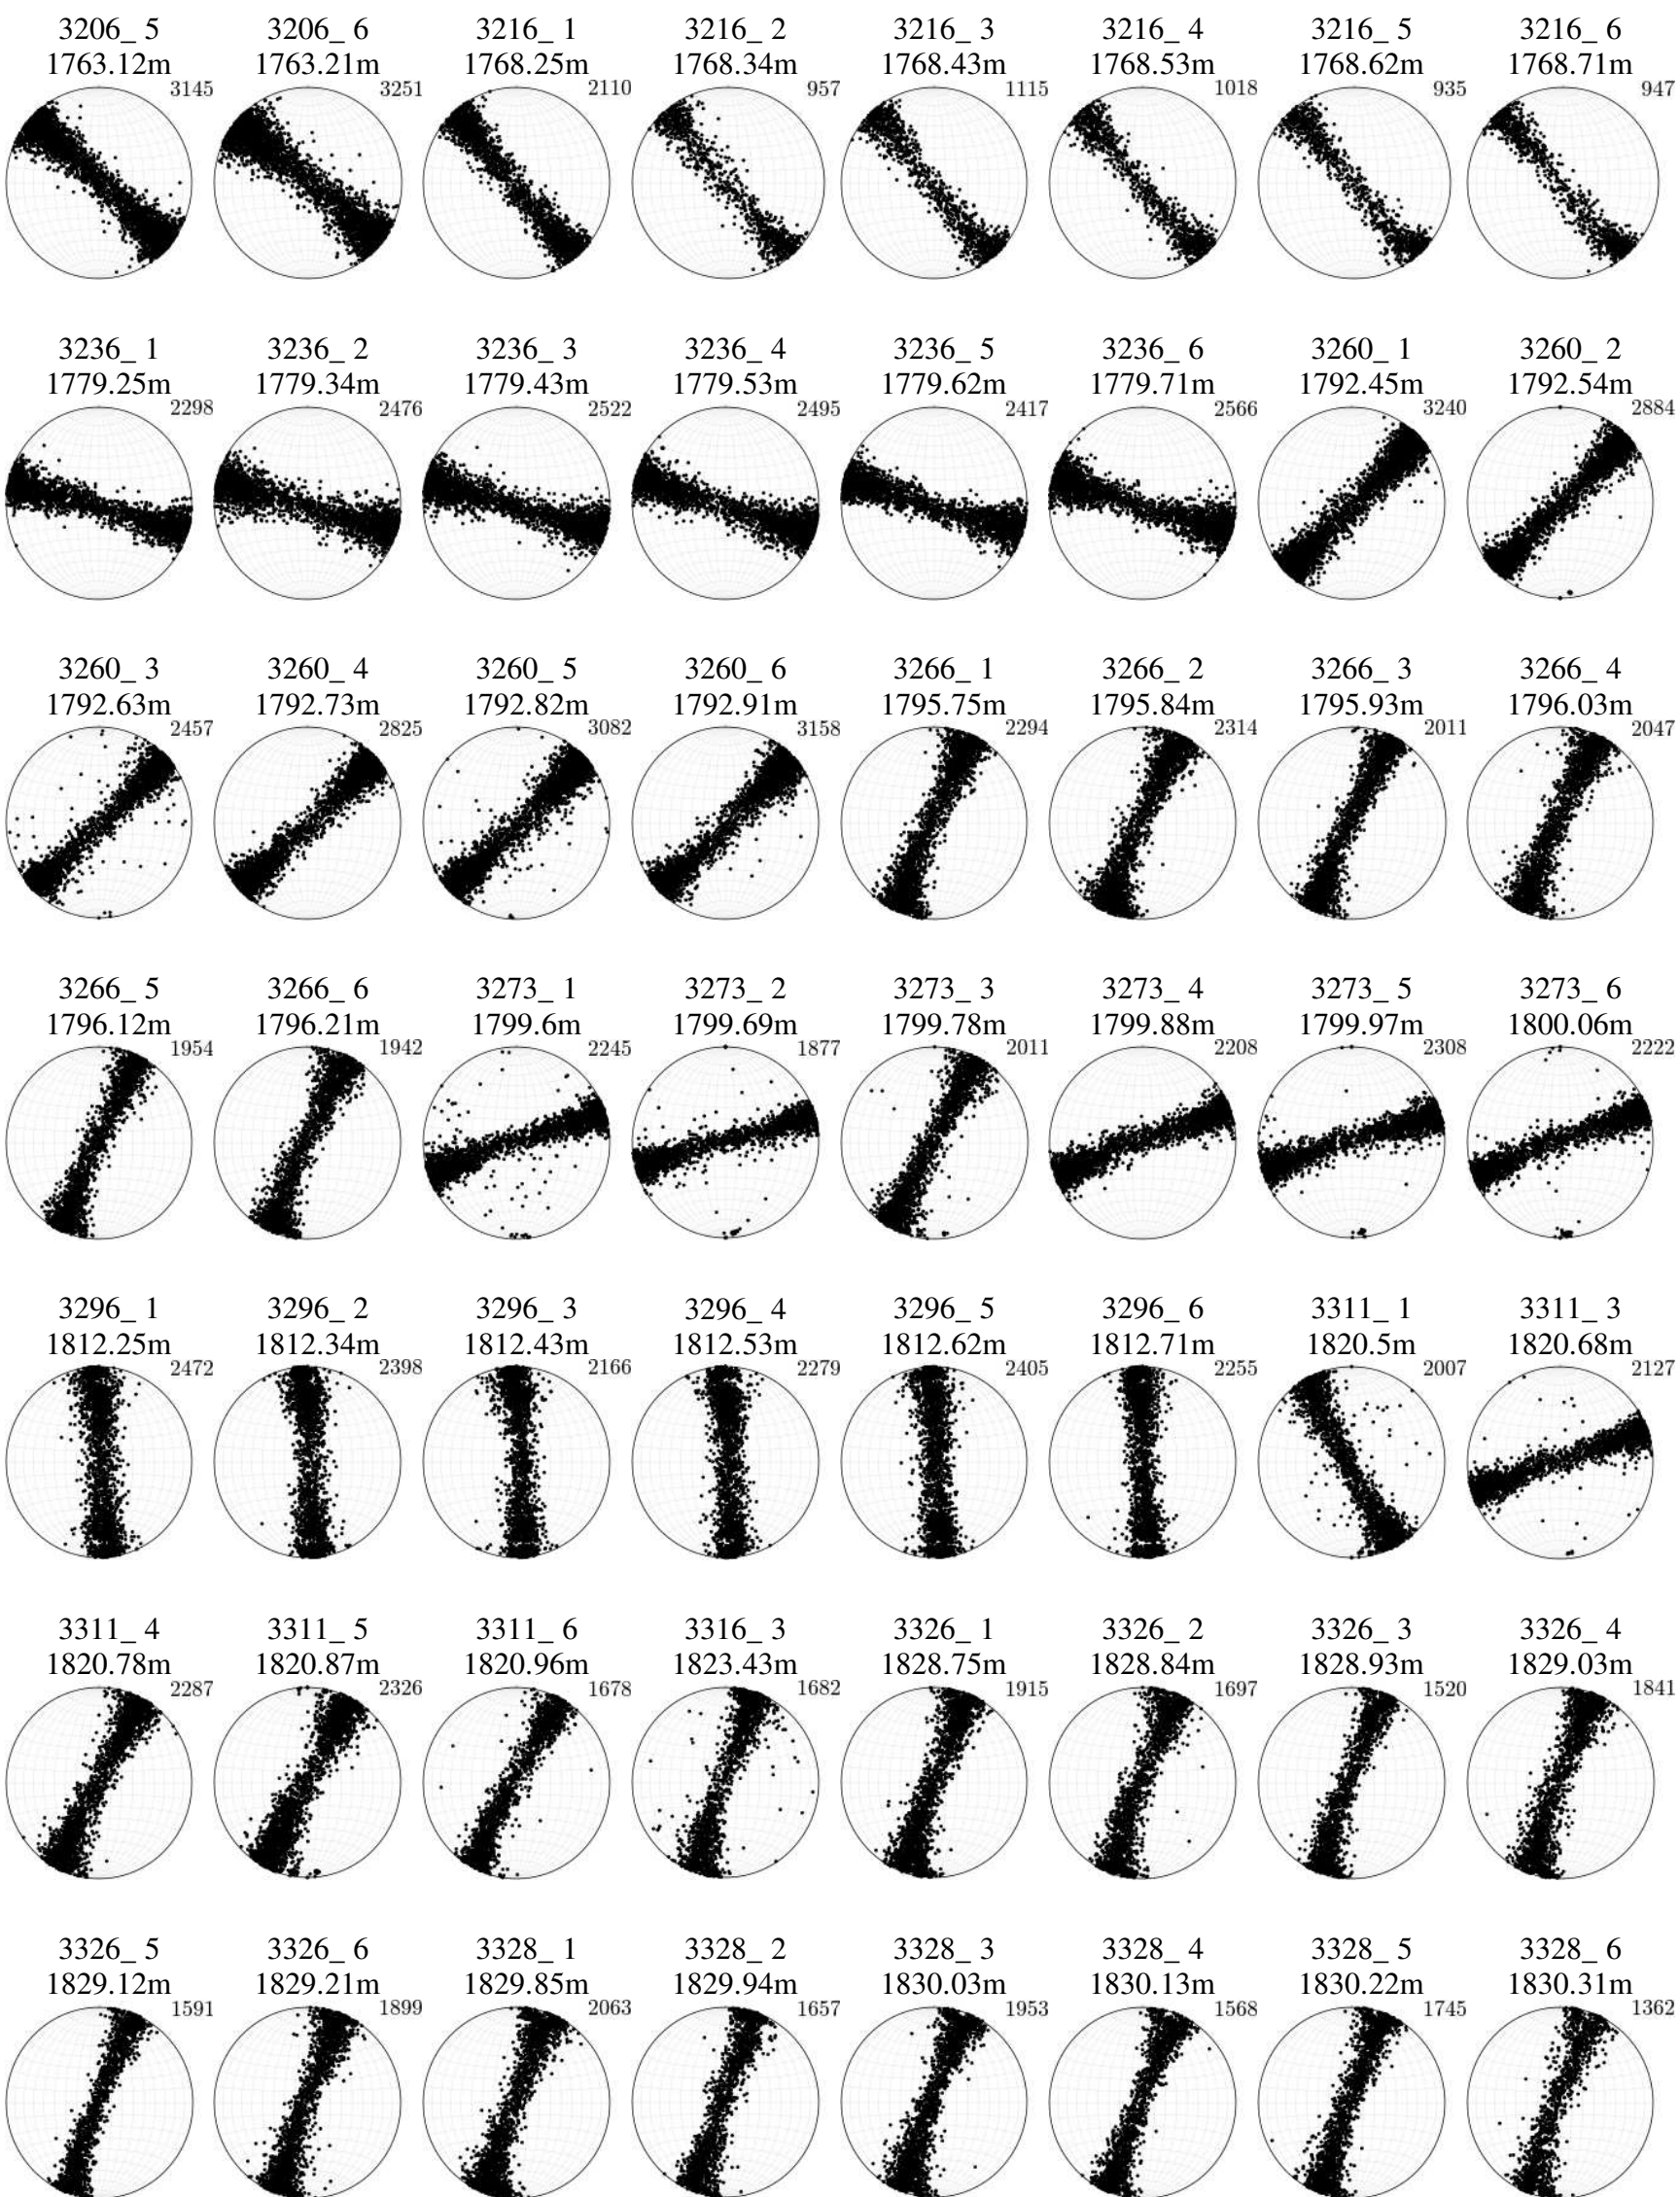



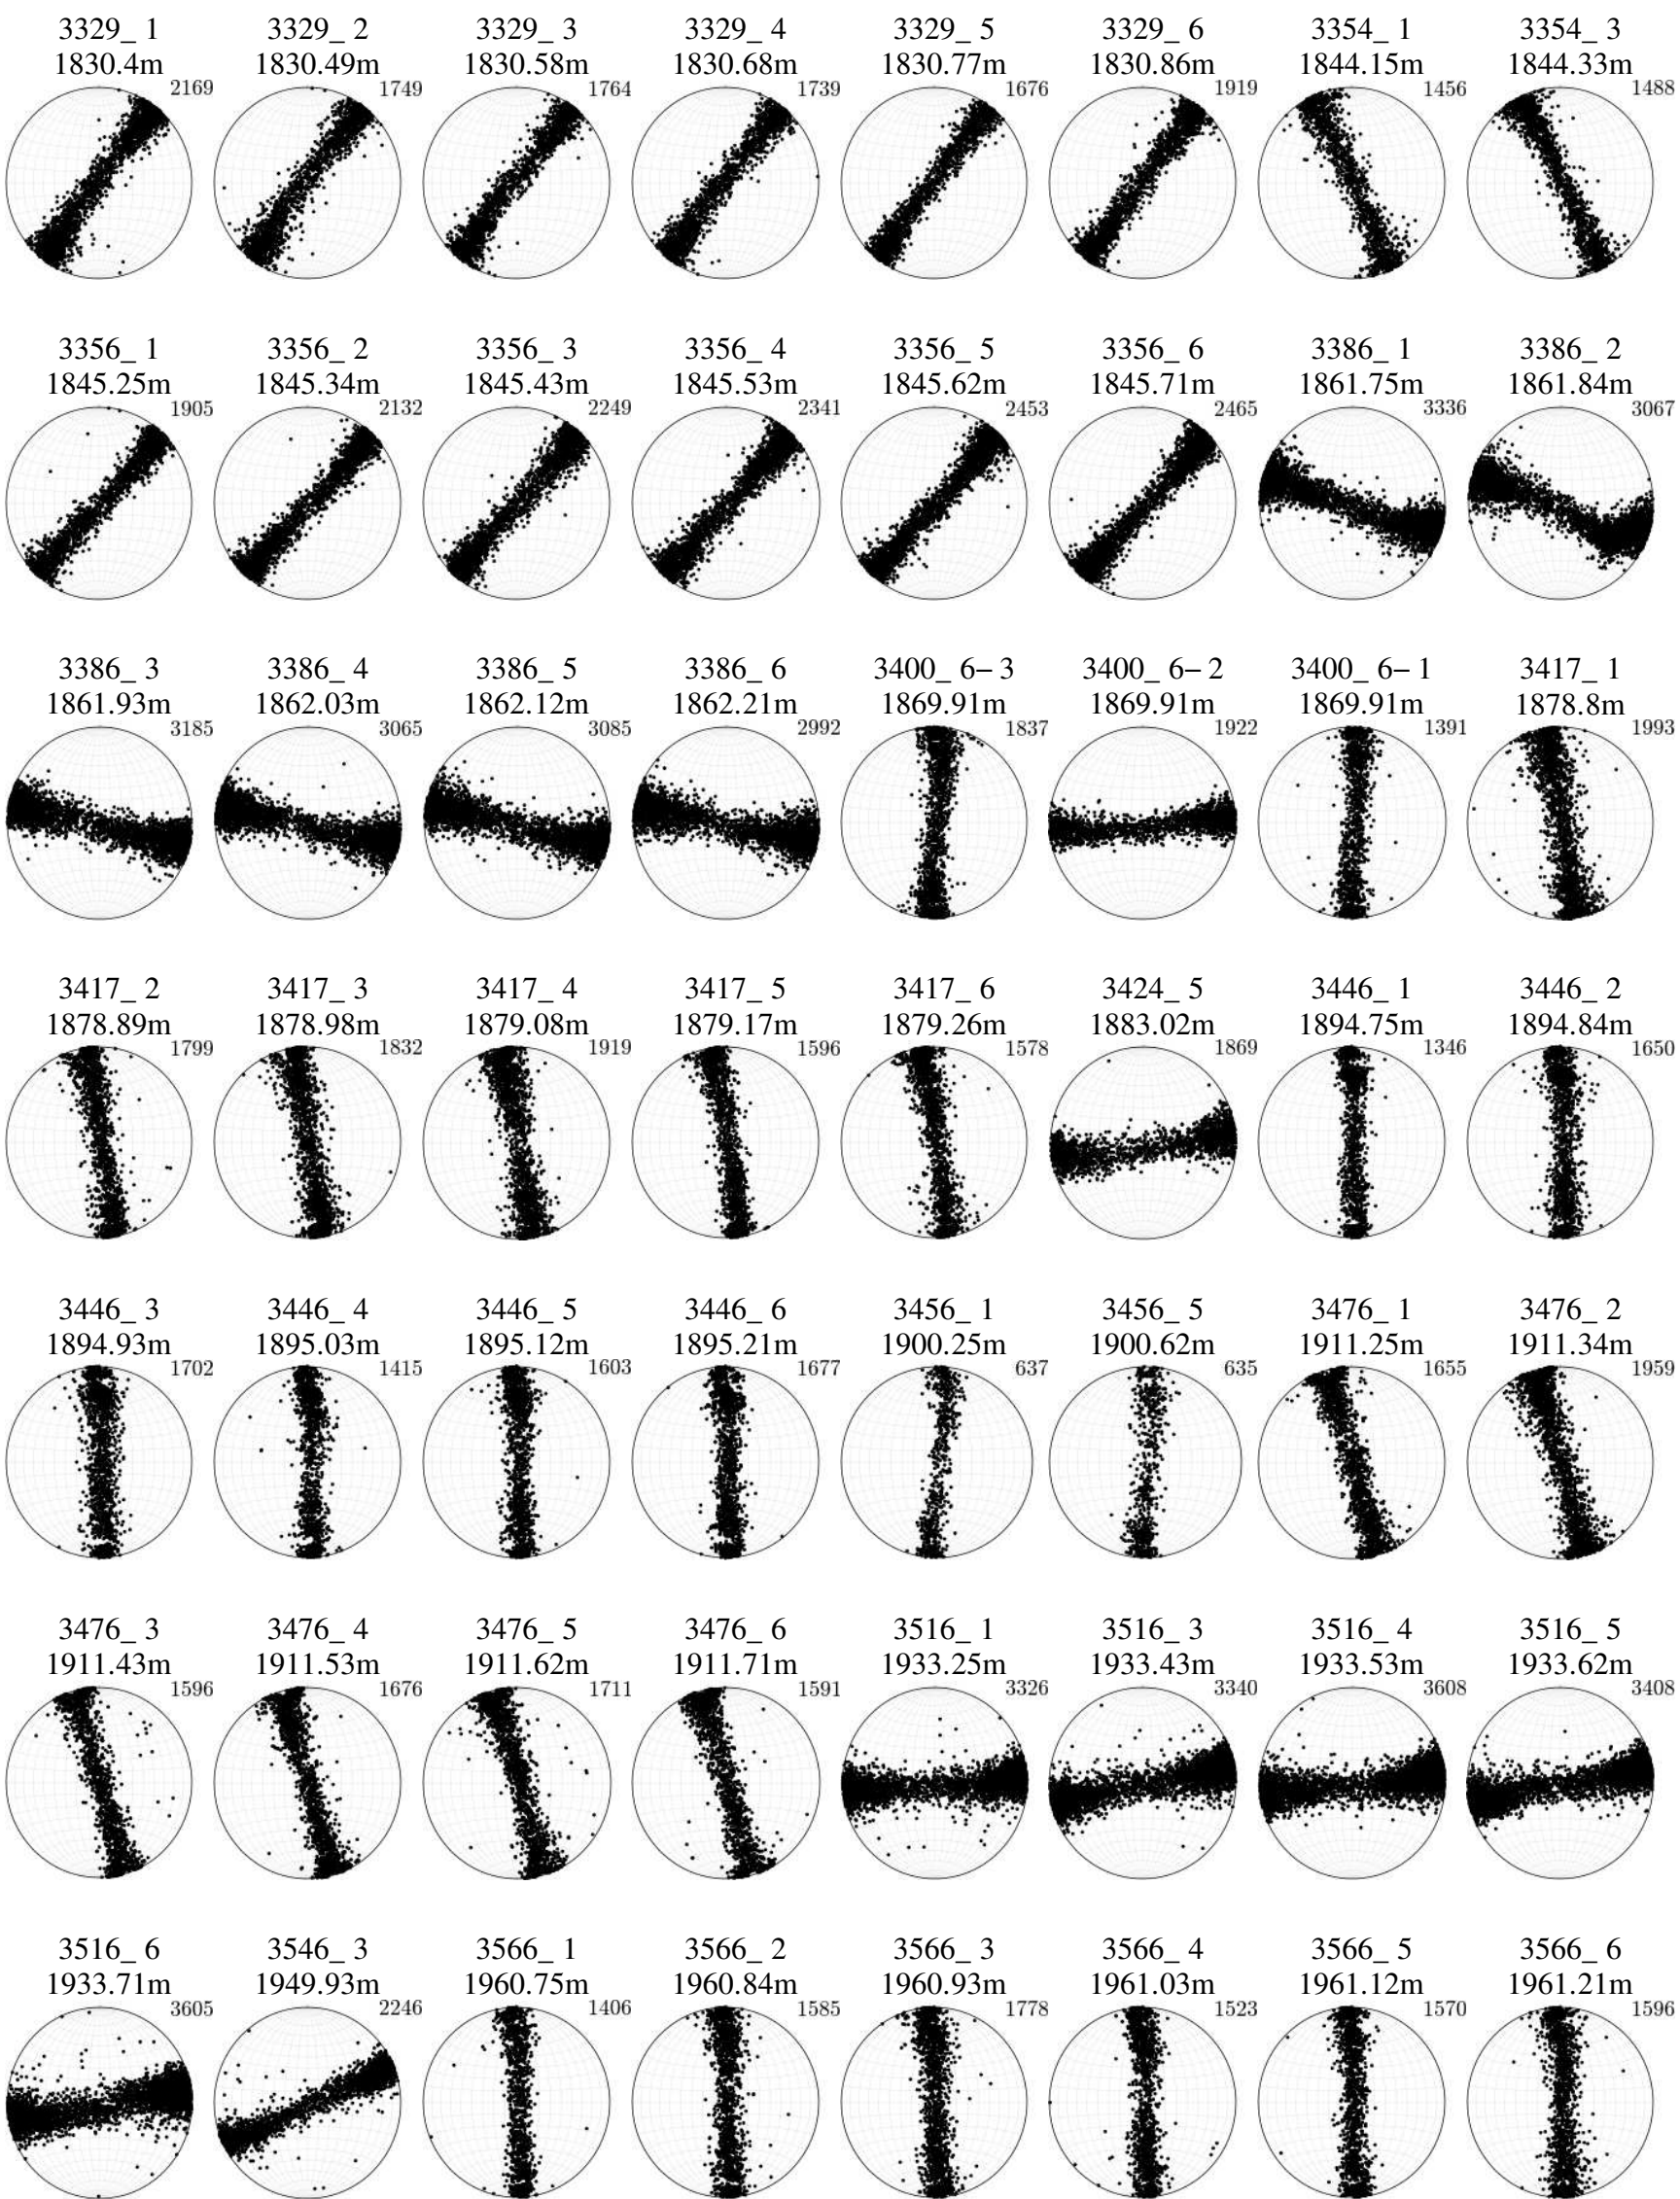

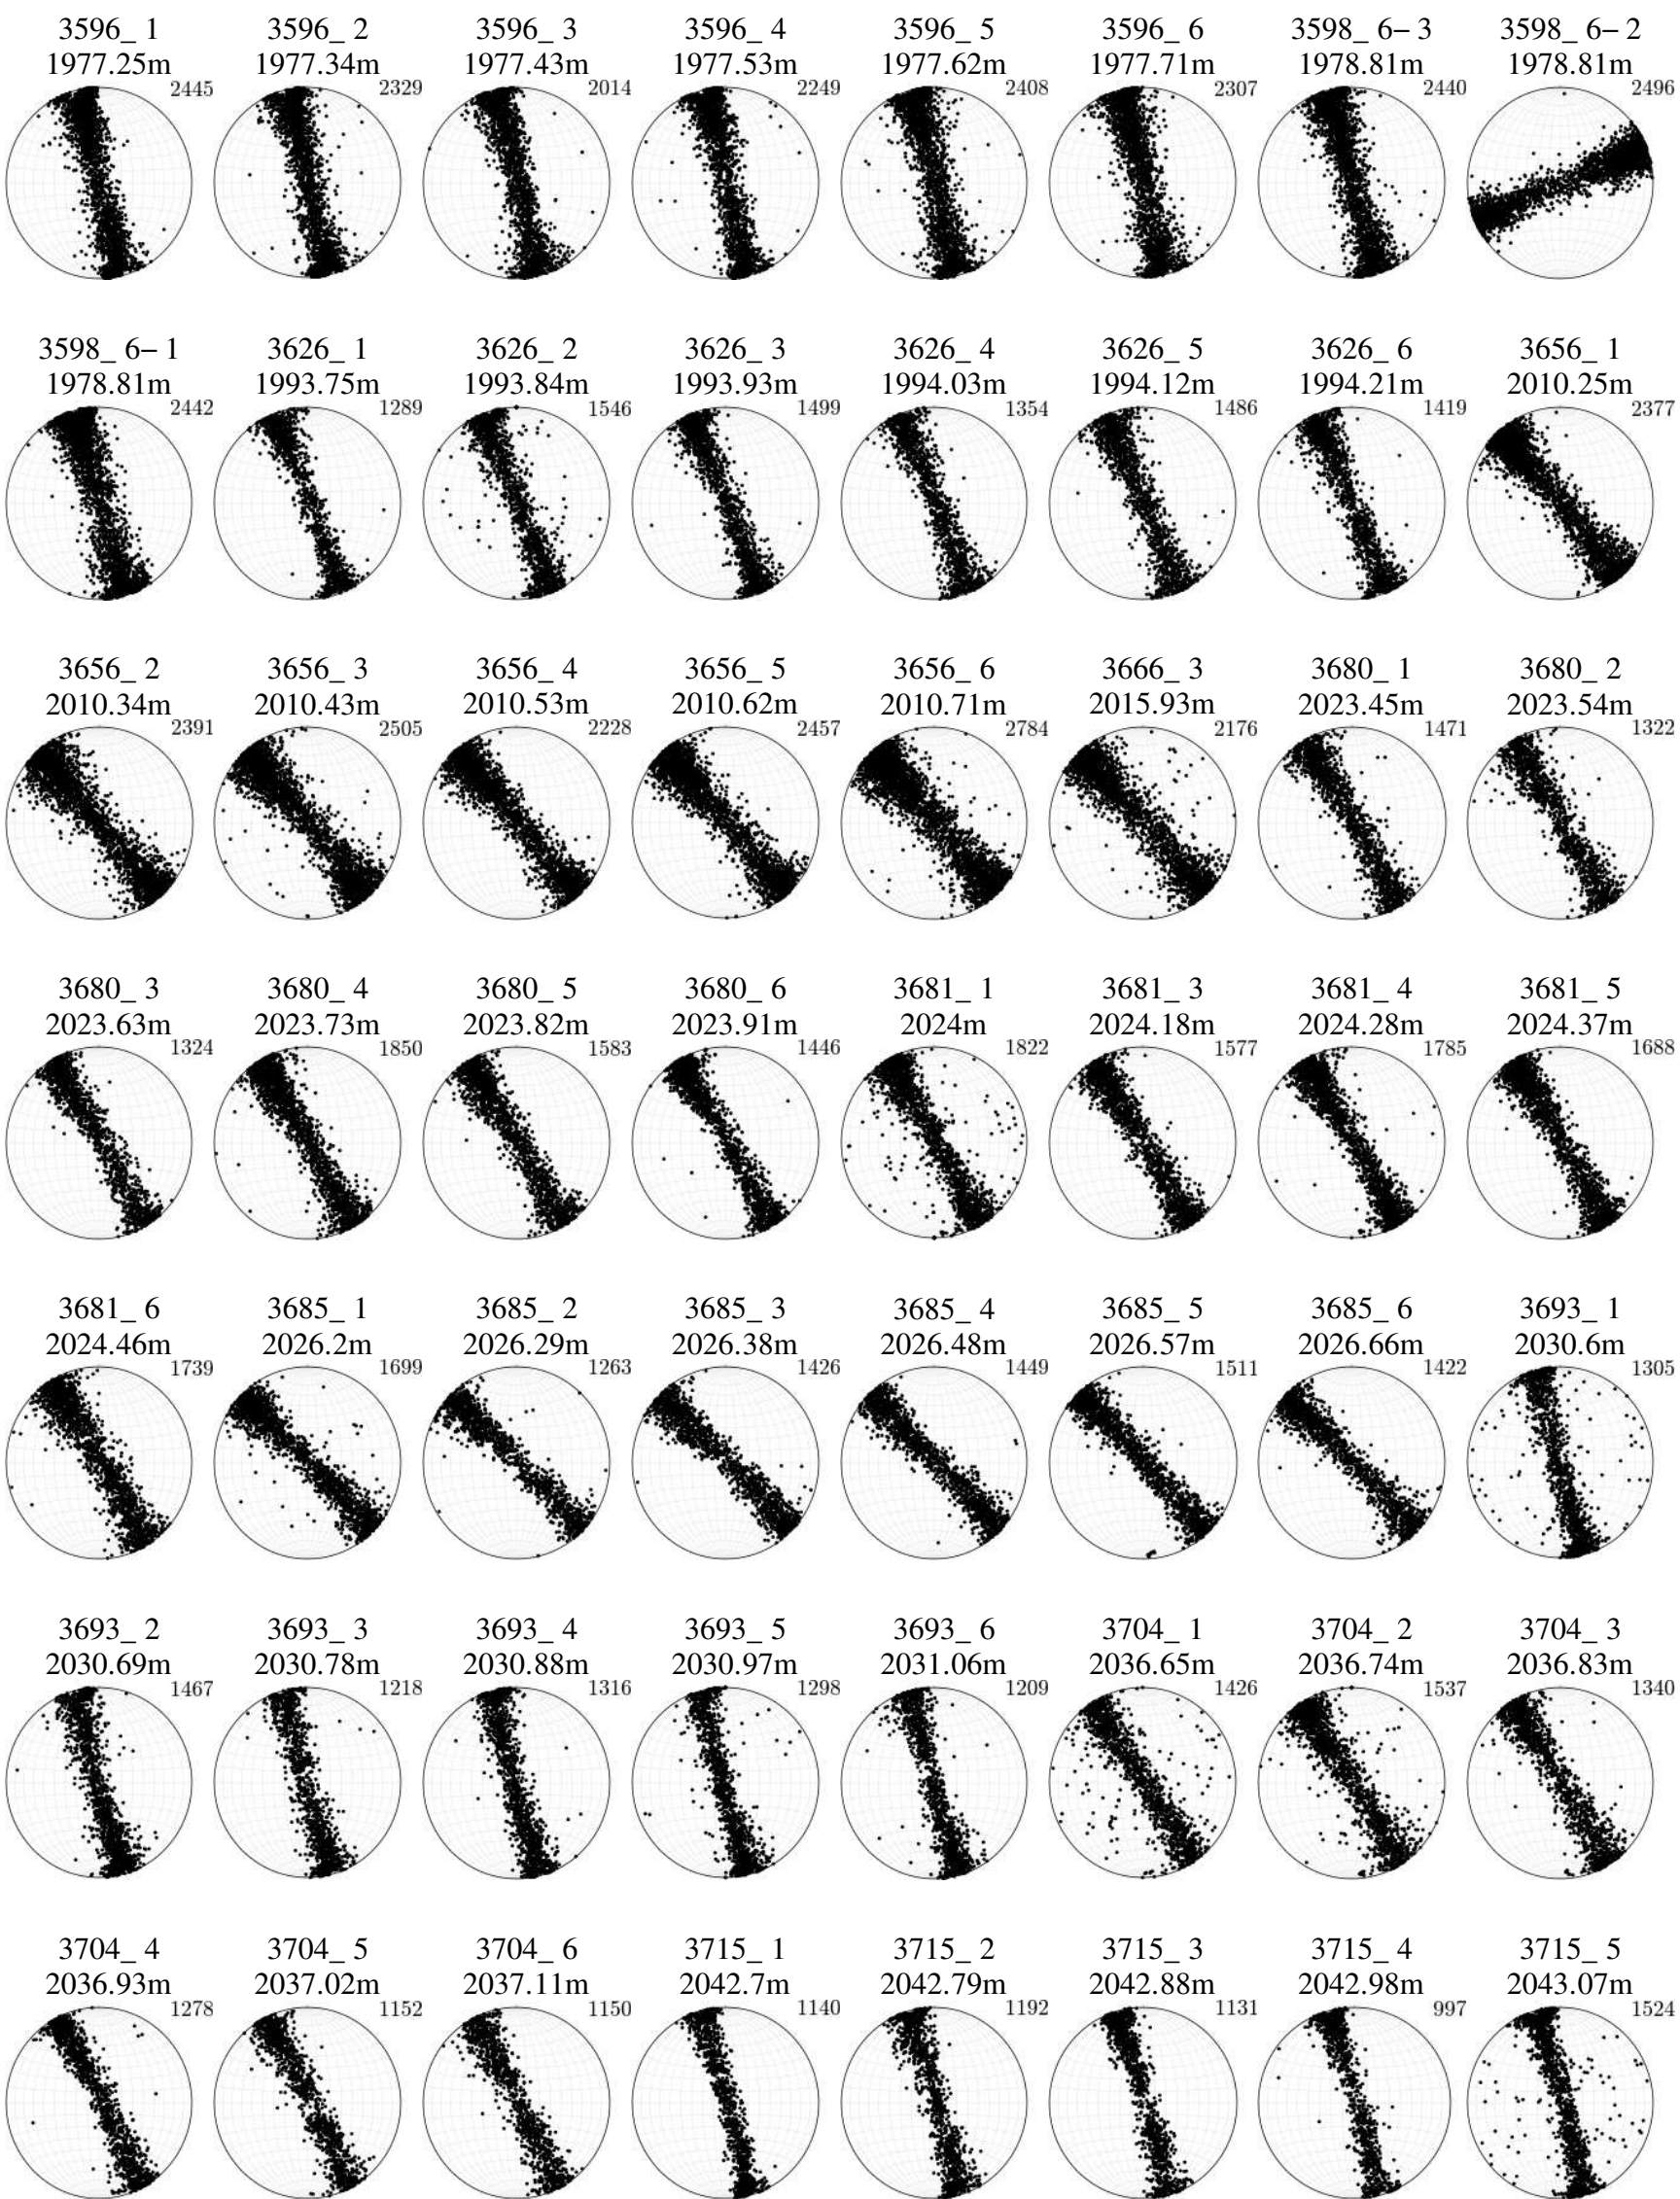

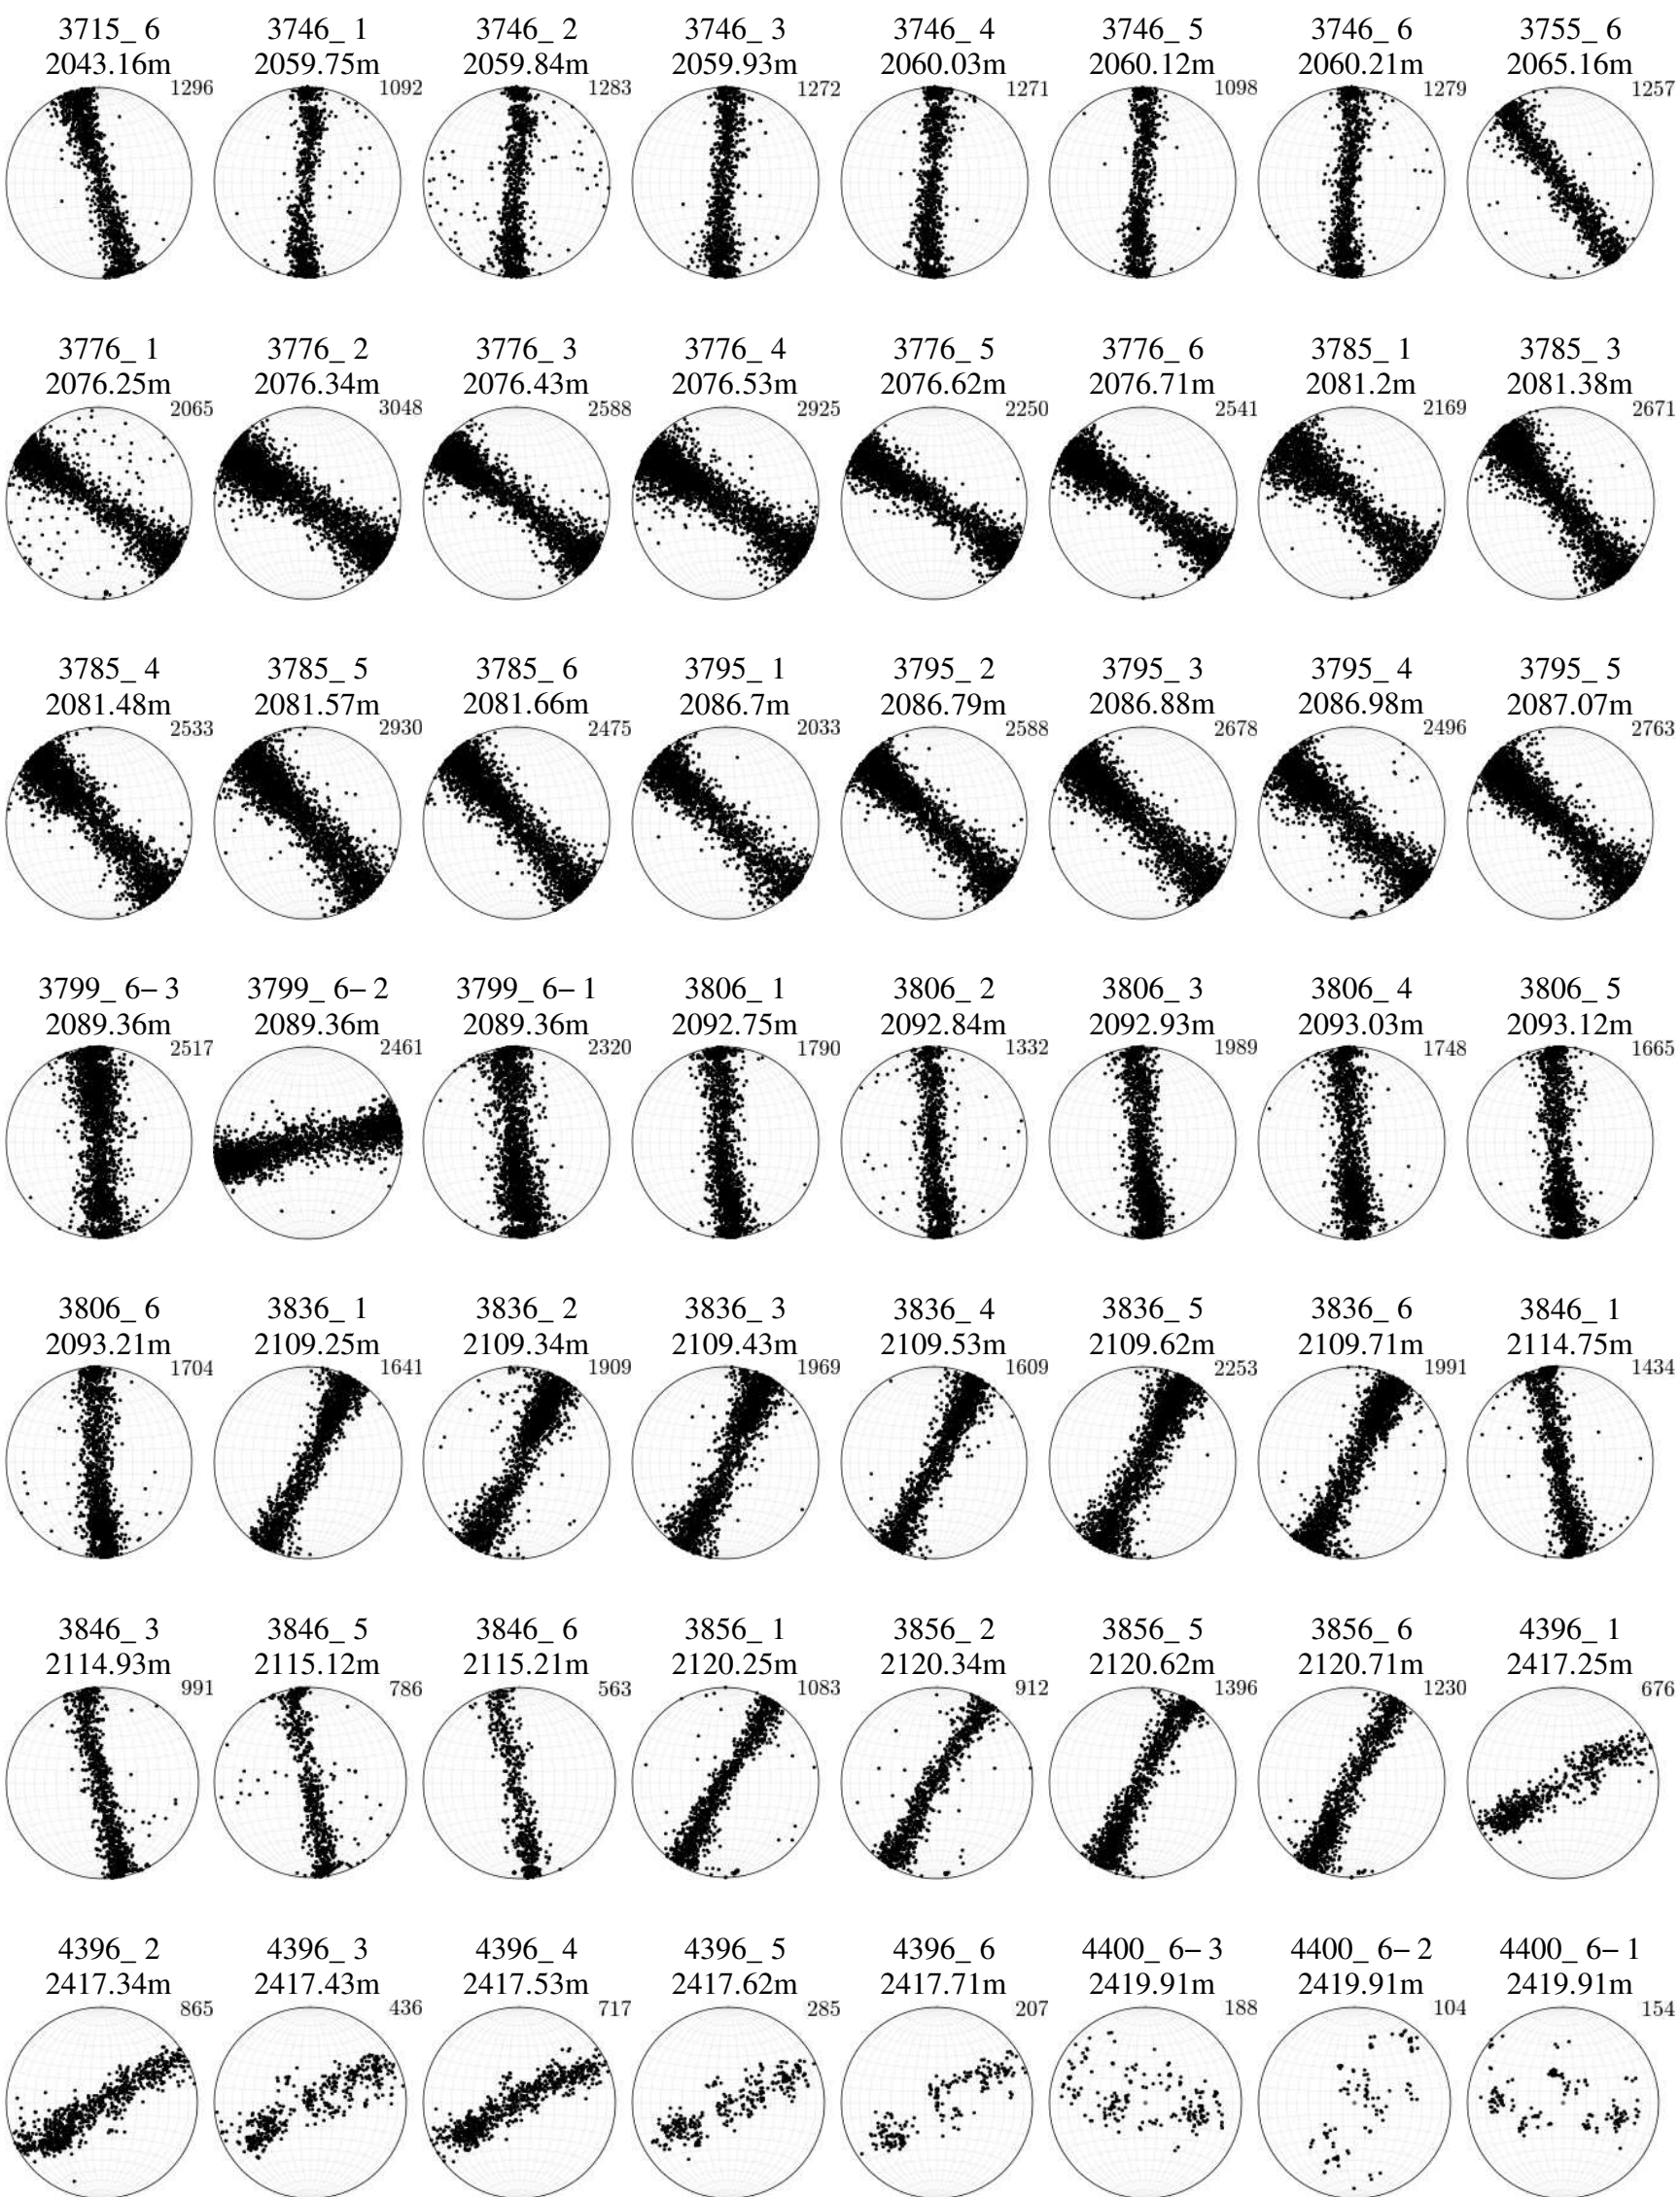

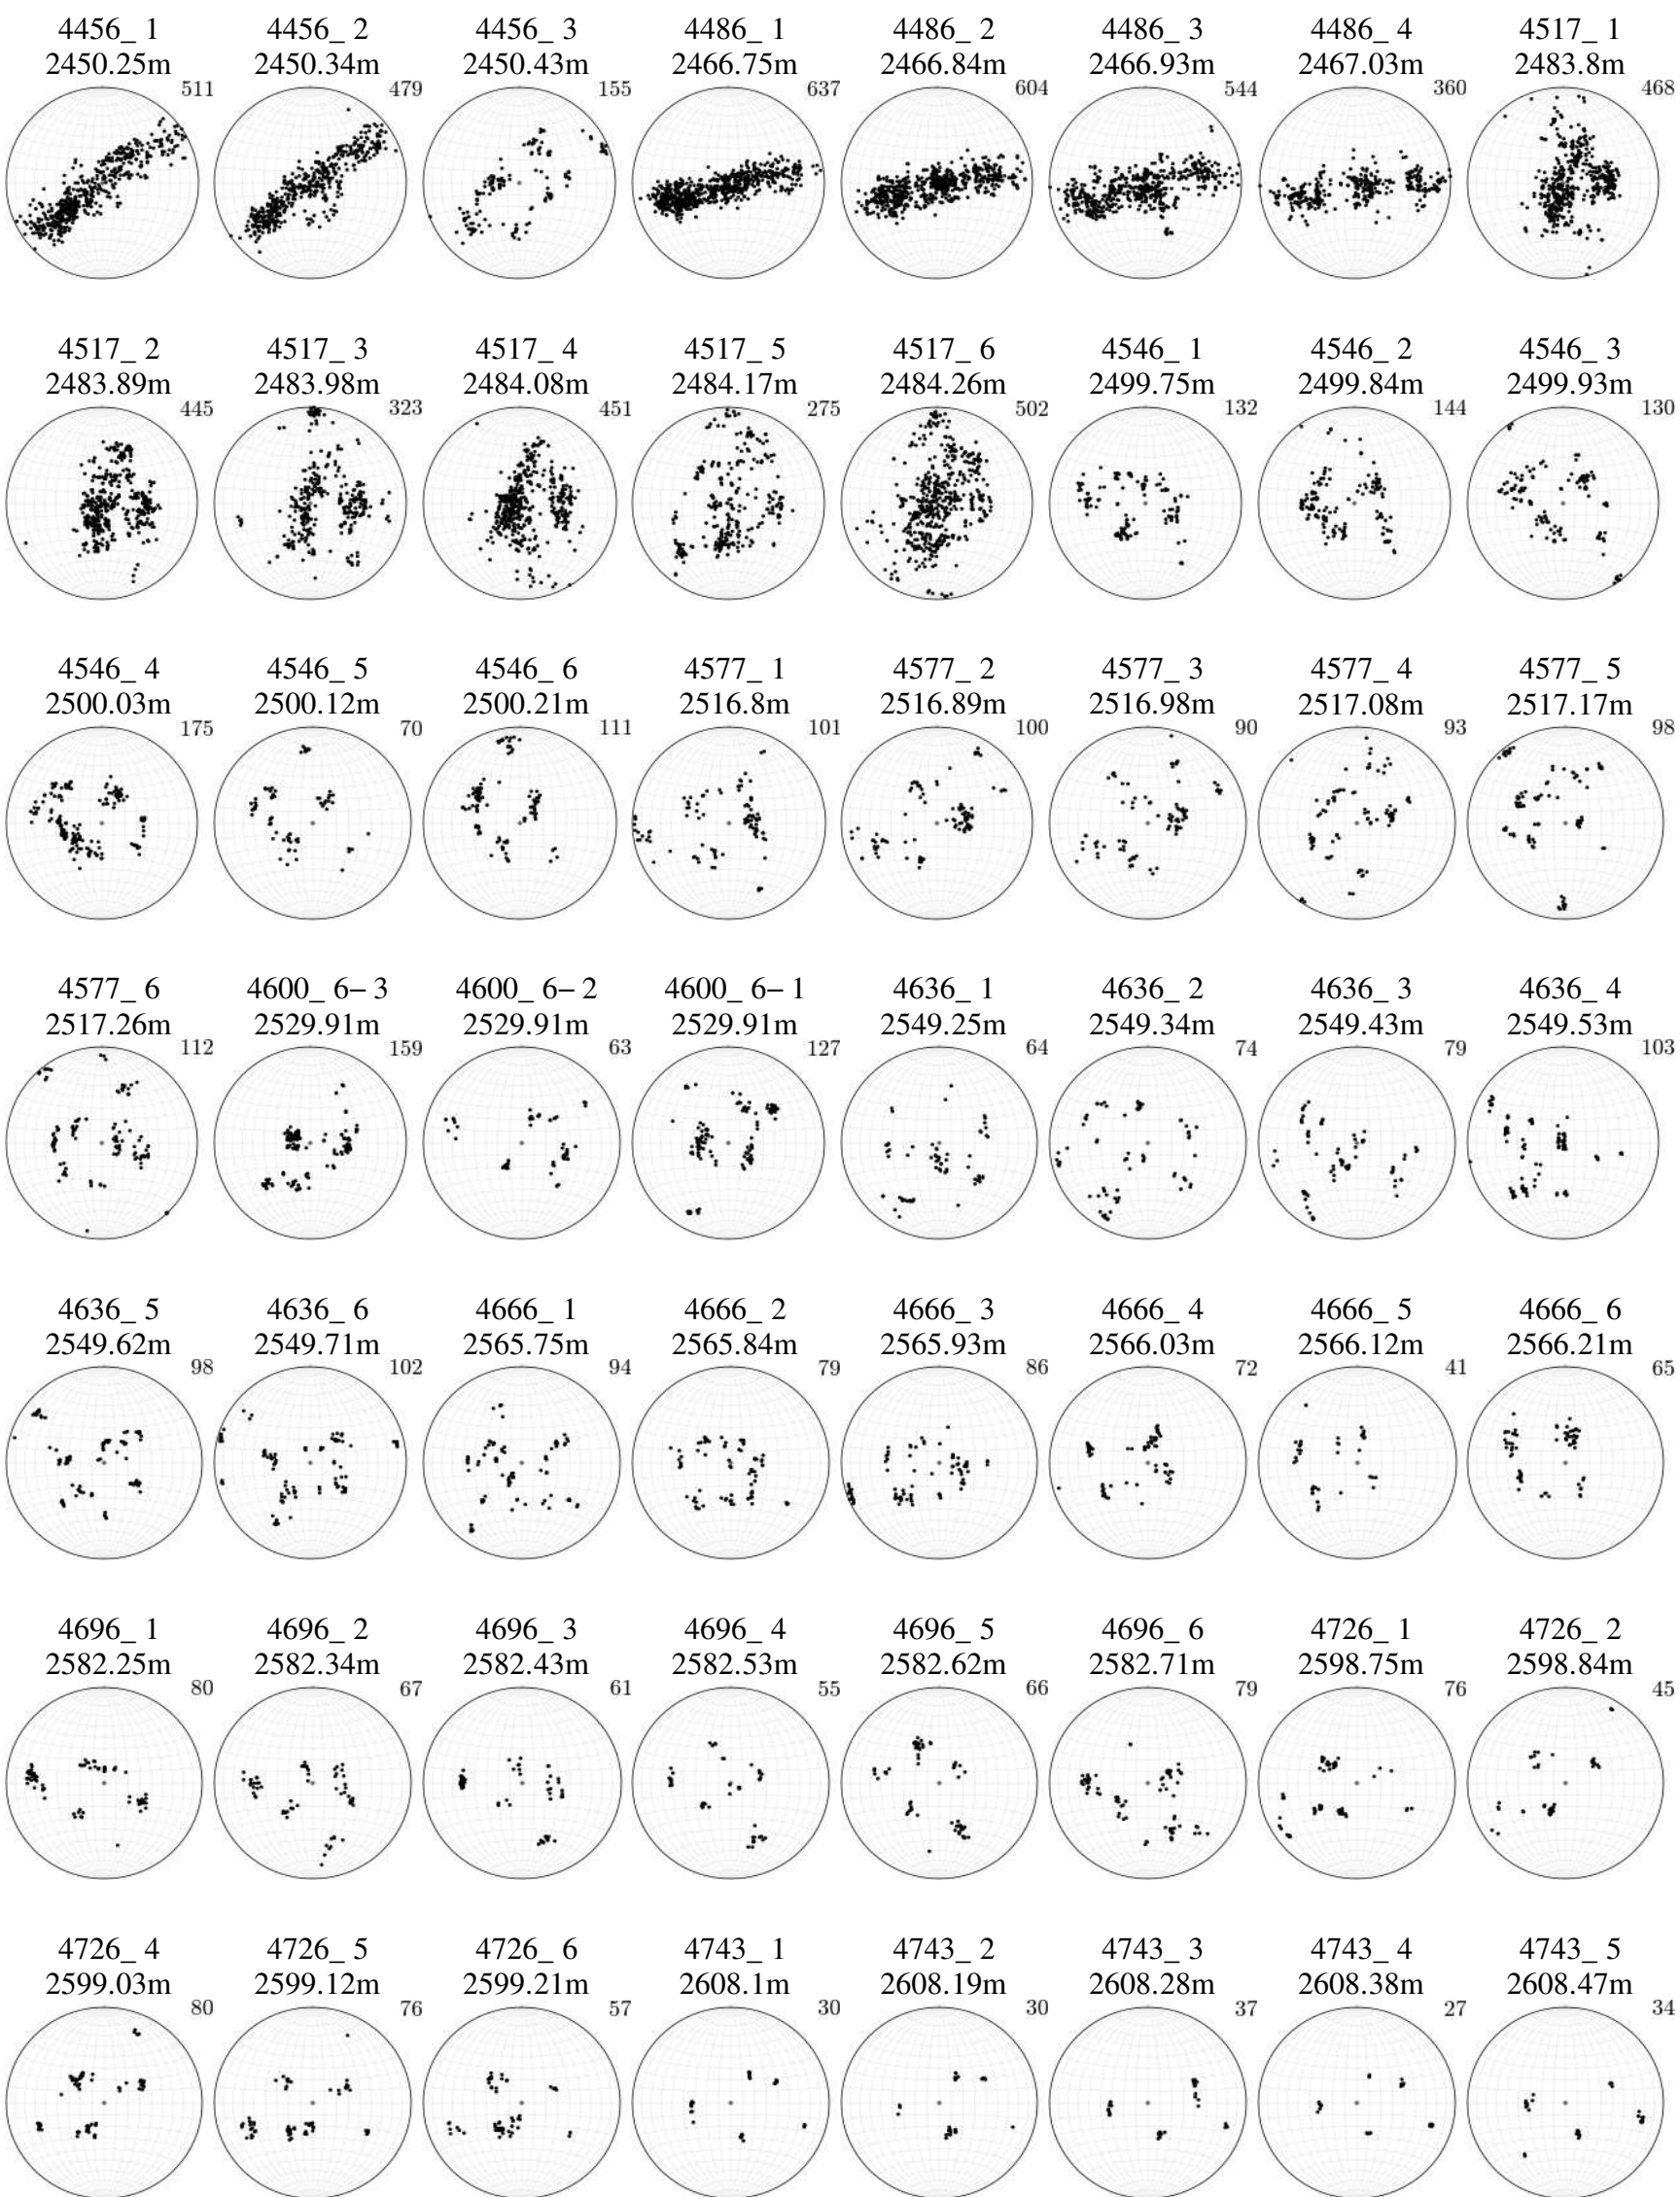

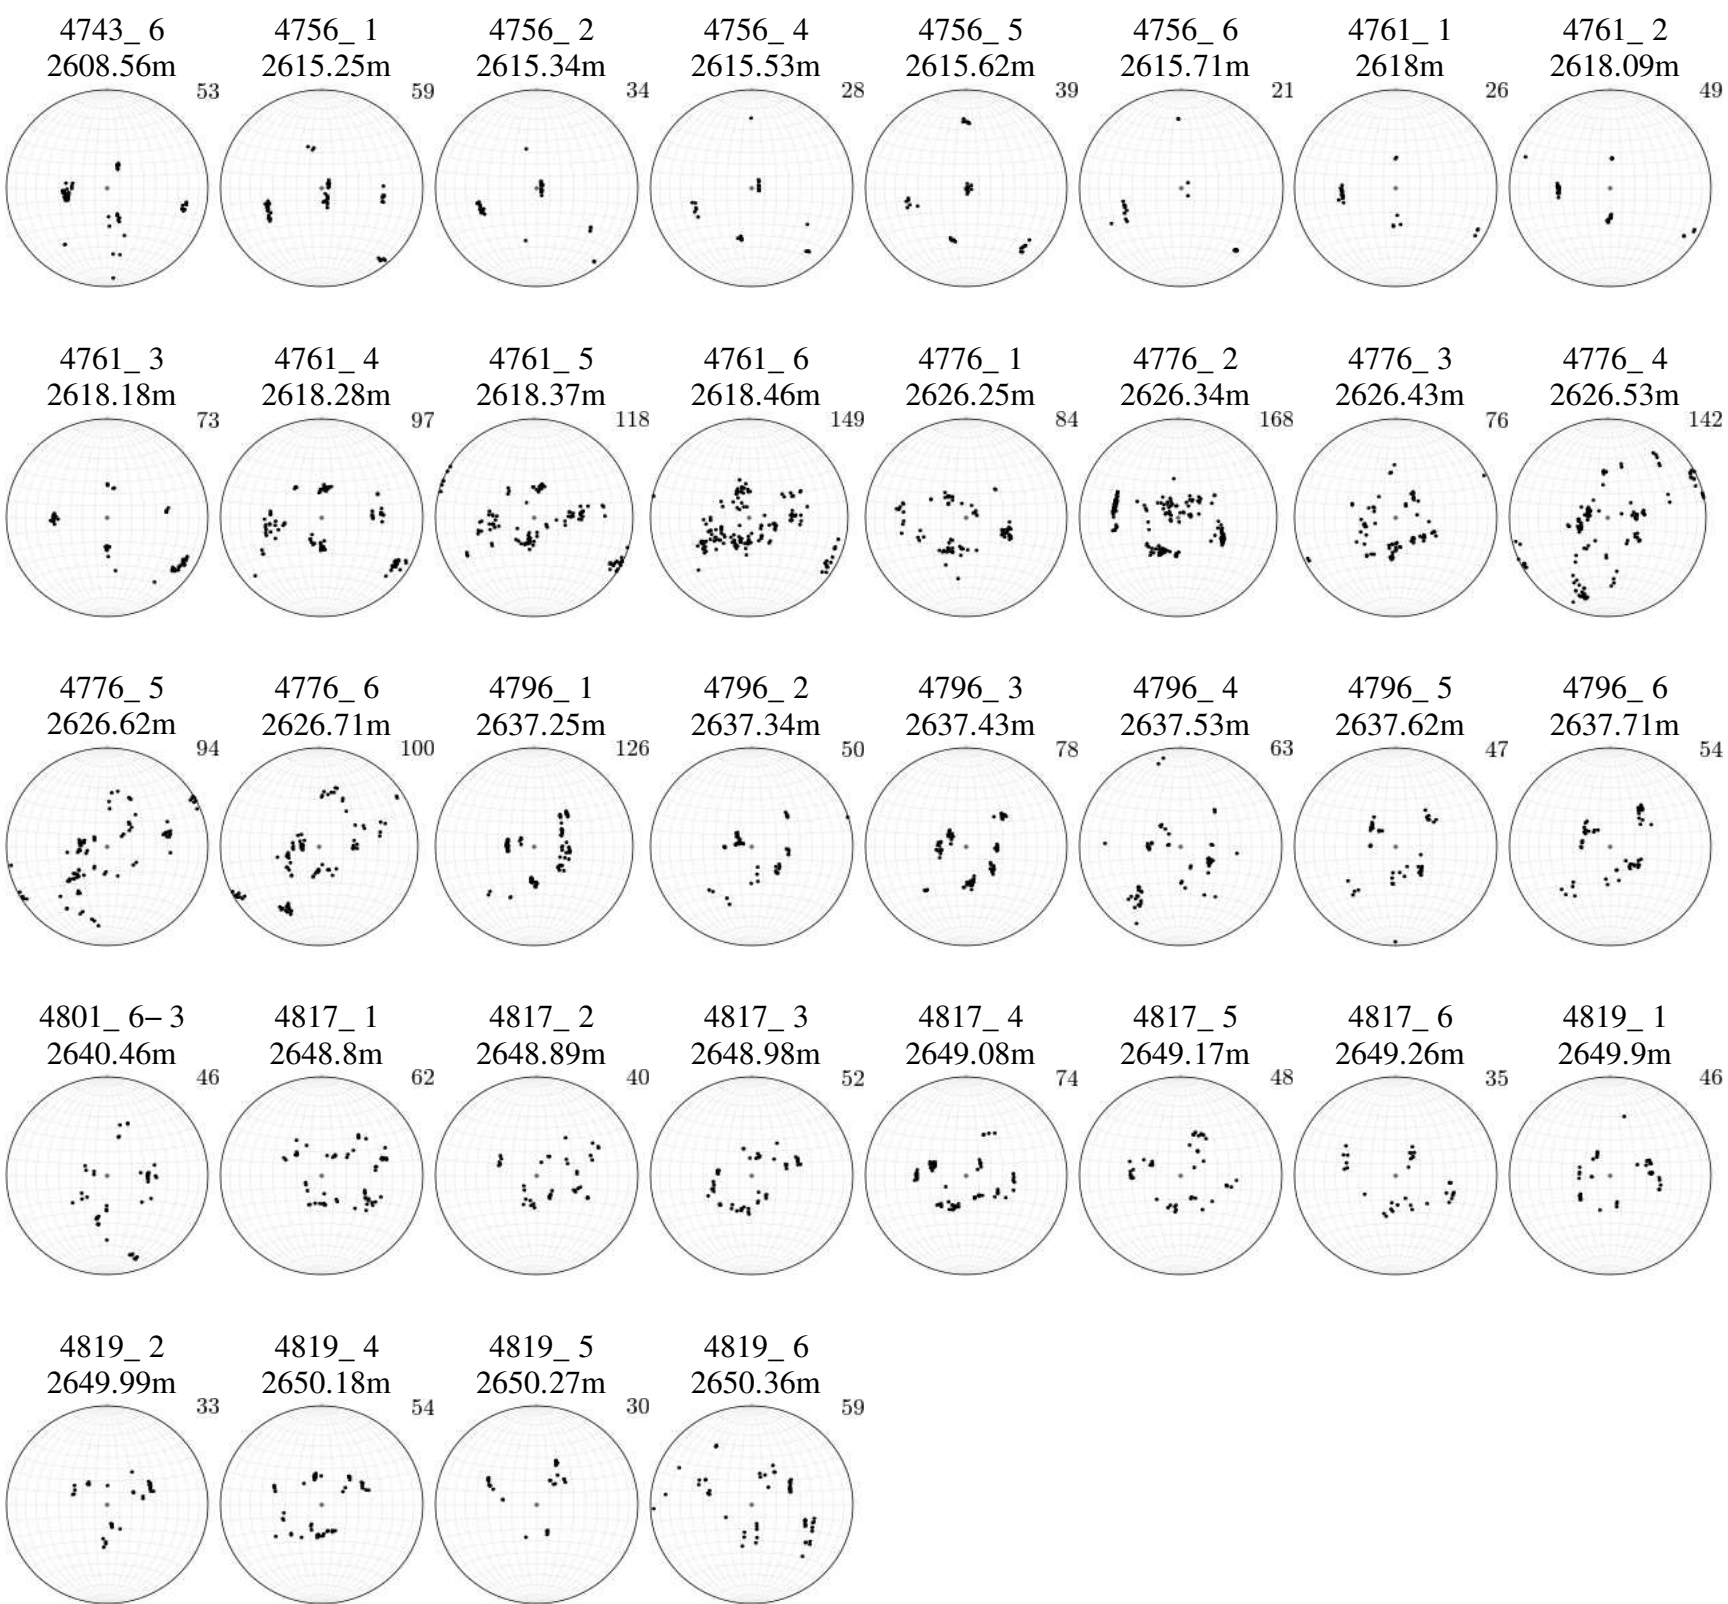

Supplement: Supplementary file 1 [file egusphere-2024-2653-supplement.pdf]
